# Supplementary material for: Application of Feature-Based Molecular Networking for Comparative Metabolomics and Targeted Isolation of Stereoisomers from Algicolous Fungi
Source: MDPI journal article supplement (doi:10.3390/md20030210), 2022-03-16
Supplement: s1 [file s1]

# Application of Feature-Based Molecular Networking for Comparative Metabolomics and Targeted Isolation of Stereoisomers from Algicolous Fungi

Bicheng Fan <sup>1</sup>, Laura Grauso <sup>2</sup>, Fengjie Li <sup>1</sup>, Silvia Scarpato <sup>3</sup>, Alfonso Mangoni<sup>3</sup>, and Deniz Tasdemir <sup>1,4\*</sup>

<sup>1</sup> GEOMAR Centre for Marine Biotechnology (GEOMAR-Biotech), Research Unit Marine Natural Products Chemistry, GEOMAR Helmholtz Centre for Ocean Research Kiel, Am Kiel-Kanal 44, 24106 Kiel, Germany; bichengfan@hotmail.com (B.F.); Fengjieli0620@hotmail.com (F.L.)

<sup>2</sup> Dipartimento di Agraria, Università degli Studi di Napoli Federico II, 80055 Portici, Italy; laura.grauso@unina.it

<sup>3</sup> Dipartimento di Farmacia, Università degli Studi di Napoli Federico II, 80131 Napoli, Italy; silvia.scarpato@unina.it (S.S.); alfonso.mangoni@unina.it (A.M.)

<sup>4</sup> Faculty of Mathematics and Natural Sciences, Kiel University, Christian-Albrechts-Platz 4, 24118 Kiel, Germany

\* Correspondence: dtasdemir@geomar.de; Tel.: +49-431-600-4430

## List of Figures:

**Figure S1.** Global molecular networking of KC subextracts of *Pyrenochaetopsis* sp. strain FVE-001 (grey) and *Pyrenochaetopsis* sp. strain FVE-087 (red). **A).** Cluster annotated as decalin derivative containing pyrenosetins and phomasetin. **B).** Cluster annotated as decalin derivative containing wakodecalines.

**Figure S2.** Euler diagram based on the global molecular network (MN in Figure S1). Grey: ions observed in the KC subextract of *Pyrenochaetopsis* sp. FVE-001. Red: ions observed in the KC subextract of *Pyrenochaetopsis* sp. FVE-087.

**Figure S3.** <sup>1</sup>H NMR spectrum of compound **5** (600 MHz, CDCl<sub>3</sub>).

**Figure S4.** <sup>13</sup>C NMR spectrum of compound **5** (150 MHz, CDCl<sub>3</sub>).

**Figure S5.** DEPT-HSQC spectrum of compound **5** (600M Hz, CDCl<sub>3</sub>).

**Figure S6.** COSY spectrum of compound **5** (600 MHz, CDCl<sub>3</sub>).

**Figure S7.** HMBC spectrum of compound **5** (600 MHz, CDCl<sub>3</sub>).

**Figure S8.** NOESY spectrum of compound **5** (600 MHz, CDCl<sub>3</sub>).

**Figure S9.** <sup>1</sup>H NMR spectrum of 16-(*R*)-MTPA ester of **5** (600M Hz, CDCl<sub>3</sub>).

**Figure S10.** <sup>1</sup>H NMR spectrum of 16-(*S*)-MTPA ester of **5** (600M Hz, CDCl<sub>3</sub>).

**Figure S11.** HR-ESIMS of compound **5**.

**Figure S12.** FT-IR spectrum of compound **5**.

**Figure S13.** <sup>1</sup>H NMR spectrum of compound **6** (600 MHz, CDCl<sub>3</sub>).

**Figure S14.** <sup>13</sup>C NMR spectrum of compound **6** (150 MHz, CDCl<sub>3</sub>).

**Figure S15.** DEPT-HSQC spectrum of compound **6** (600M Hz, CDCl<sub>3</sub>).

**Figure S16.** COSY spectrum of compound **6** (600M Hz, CDCl<sub>3</sub>).

**Figure S17.** HMBC spectrum of compound **6** (600M Hz, CDCl<sub>3</sub>).

**Figure S18.** NOESY spectrum of compound **6** (600M Hz, CDCl<sub>3</sub>).

**Figure S19.** HR-ESIMS spectrum of compound **6**.

**Figure S20.** FT-IR spectrum of compound **6**.

**Figure S21.** DP4+ results for compound 5.

**Figure S22.** DP4+ results for compound 6.

**Figure S23.** DP4+ results for compound 3.

### **List of Tables:**

**Table S1.** Putatively identified compounds by MN-based dereplication of KC subextracts of *Pyrenochaetopsis* sp. strains FVE-001 and FVE-087. Annotation considered the putative ID, retention time ( $t_R$ ),  $m/z$  value, adduct, chemical structure, molecular formula, and MS/MS fragments.

**Table S2.** Experimental  $^{13}\text{C}$  and  $^1\text{H}$  NMR chemical shifts of pyrenosetins E (5) and Boltzmann-averaged  $^{13}\text{C}$  and  $^1\text{H}$  NMR isotropic shielding values of their four possible stereoisomers at C-3' and C-5'.

**Table S3.** Experimental  $^{13}\text{C}$  and  $^1\text{H}$  NMR chemical shifts of pyrenosetins F (6) and C (3) and Boltzmann-averaged  $^{13}\text{C}$  and  $^1\text{H}$  NMR isotropic shielding values of their four possible stereoisomers at C-3' and C-5'.

**Table S4.** Theoretical relative Gibbs free energies (kcal/mol) calculated at the B3LYP/TZVP/SMD( $\text{CHCl}_3$ )/B3LYP/6-31+G(d,p)/SMD( $\text{CHCl}_3$ ) level, and populations according to the Boltzmann distribution (300 K) of populated (>1%) conformers of the four stereoisomers of pyrenosetins E (5) considered in this study.

**Table S5.** Theoretical relative Gibbs free energies (kcal/mol) calculated at the B3LYP/TZVP/SMD( $\text{CHCl}_3$ )/B3LYP/6-31+G(d,p)/SMD( $\text{CHCl}_3$ ) level, and populations according to the Boltzmann distribution (300 K) of populated (>1%) conformers of the four stereoisomers of pyrenosetins F (6) considered in this study.

**Table S6.** Cartesian coordinates of the six lowest-energy conformers of the 3'R,5'R stereoisomer of pyrenosetins E at the B3LYP/TZVP/SMD( $\text{CHCl}_3$ )/B3LYP/6-31+G(d,p)/SMD( $\text{CHCl}_3$ ) level.

**Table S7.** Cartesian coordinates of the six lowest-energy conformers of the 3'S,5'R stereoisomer of pyrenosetins E at the B3LYP/TZVP/SMD( $\text{CHCl}_3$ )/B3LYP/6-31+G(d,p)/SMD( $\text{CHCl}_3$ ) level.

**Table S8.** Cartesian coordinates of the six lowest-energy conformers of the 3'R,5'S stereoisomer of pyrenosetins E at the B3LYP/TZVP/SMD( $\text{CHCl}_3$ )/B3LYP/6-31+G(d,p)/SMD( $\text{CHCl}_3$ ) level.

**Table S9.** Cartesian coordinates of the six lowest-energy conformers of the 3'S,5'S stereoisomer of pyrenosetins E at the B3LYP/TZVP/SMD( $\text{CHCl}_3$ )/B3LYP/6-31+G(d,p)/SMD( $\text{CHCl}_3$ ) level.

**Table S10.** Cartesian coordinates of the six lowest-energy conformers of the 3'R,5'R stereoisomer of pyrenosetins F at the B3LYP/TZVP/SMD( $\text{CHCl}_3$ )/B3LYP/6-31+G(d,p)/SMD( $\text{CHCl}_3$ ) level.

**Table S11.** Cartesian coordinates of the six lowest-energy conformers of the 3'S,5'R stereoisomer of pyrenosetins F at the B3LYP/TZVP/SMD( $\text{CHCl}_3$ )/B3LYP/6-31+G(d,p)/SMD( $\text{CHCl}_3$ ) level.

**Table S12.** Cartesian coordinates of the six lowest-energy conformers of the 3'R,5'S stereoisomer of pyrenosetins F at the B3LYP/TZVP/SMD( $\text{CHCl}_3$ )/B3LYP/6-31+G(d,p)/SMD( $\text{CHCl}_3$ ) level.

**Table S13.** Cartesian coordinates of the six lowest-energy conformers of the 3'S,5'S stereoisomer of pyrenosetins F at the B3LYP/TZVP/SMD( $\text{CHCl}_3$ )/B3LYP/6-31+G(d,p)/SMD( $\text{CHCl}_3$ ) level.

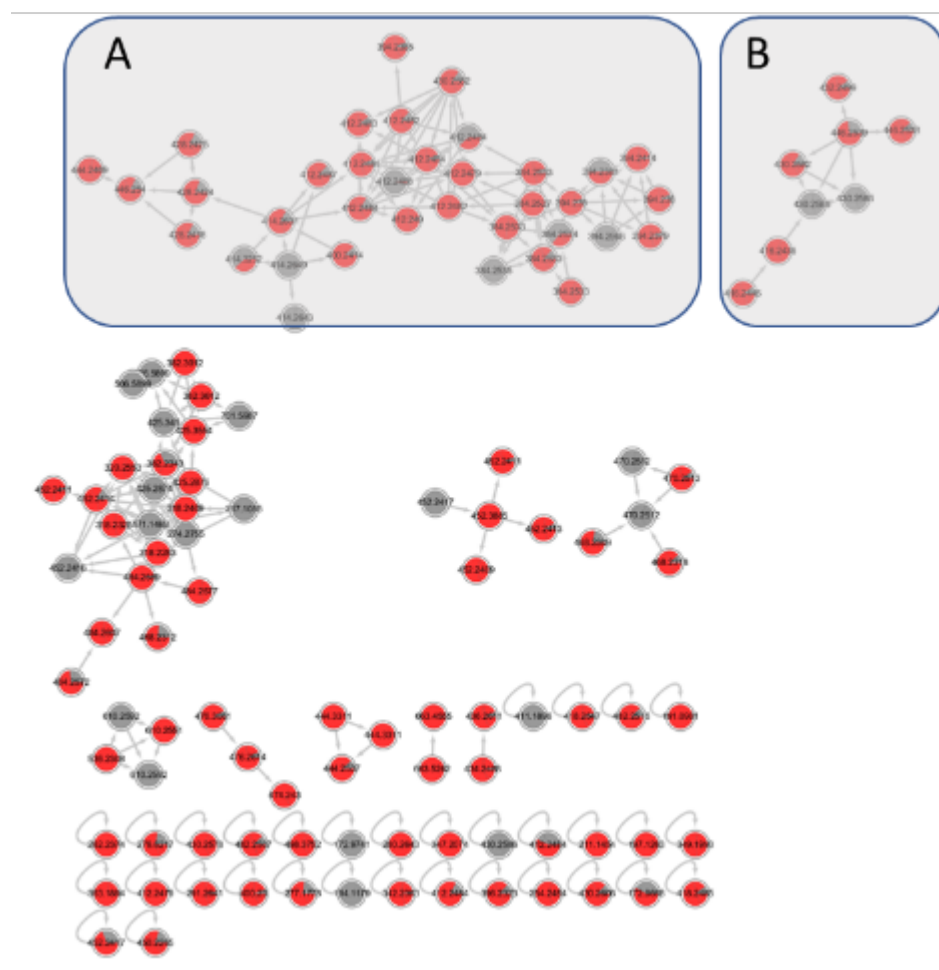

**Figure S1.** Global molecular networking of KC subextracts of *Pyrenochaetopsis* sp. strain FVE-001 (grey) and *Pyrenochaetopsis* sp. strain FVE-087 (red). **A).** Cluster annotated as decalin derivative containing pyrenosetins and phomasetin. **B).** Cluster annotated as decalin derivative containing wakodecalines.

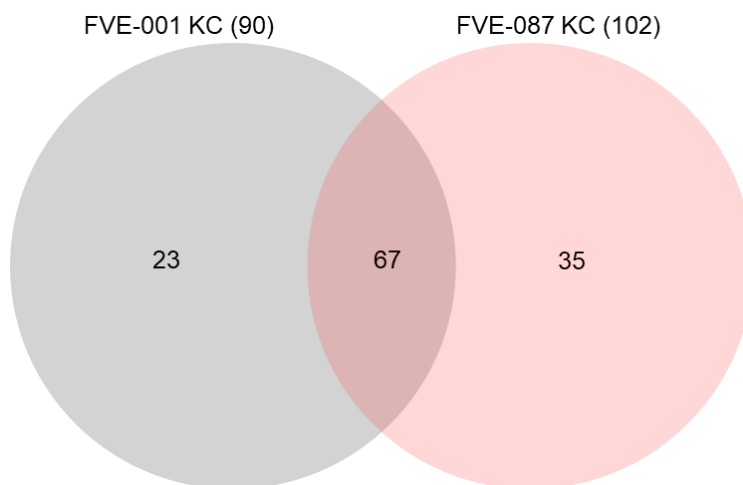

**Figure S2.** Euler diagram based on the global molecular network (MN in Figure S1). Grey: ions observed in the KC subextract of *Pyrenochaetopsis* sp. FVE-001. Red: ions observed in the KC subextract of *Pyrenochaetopsis* sp. FVE-087.

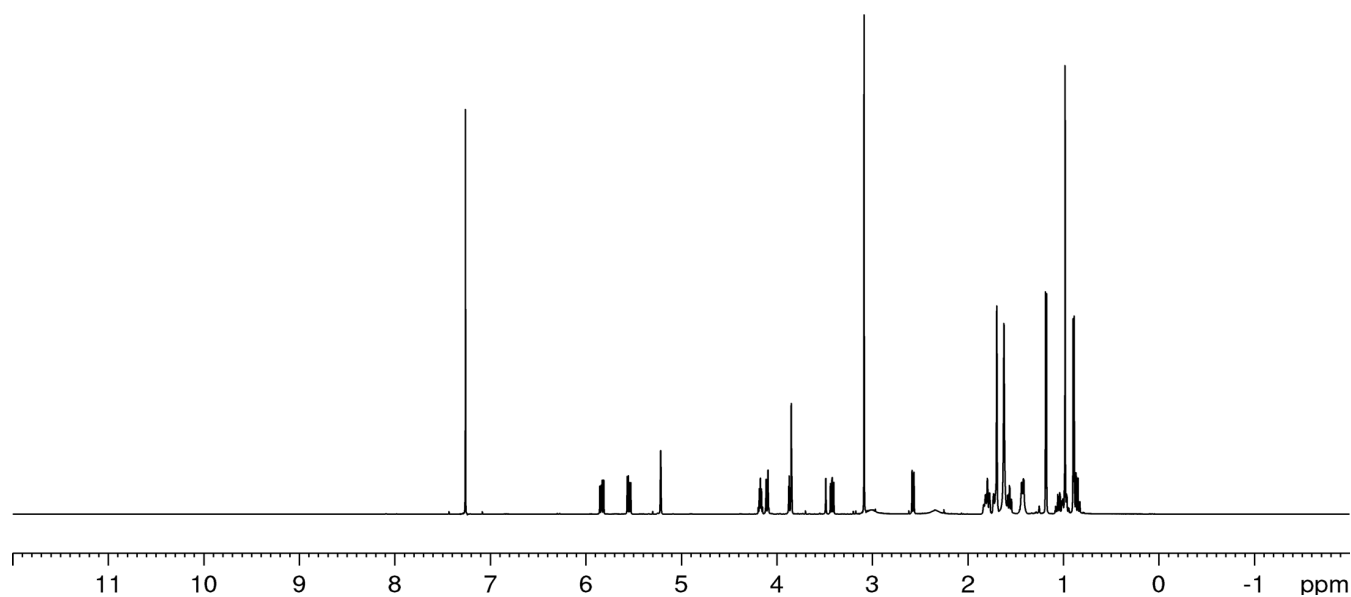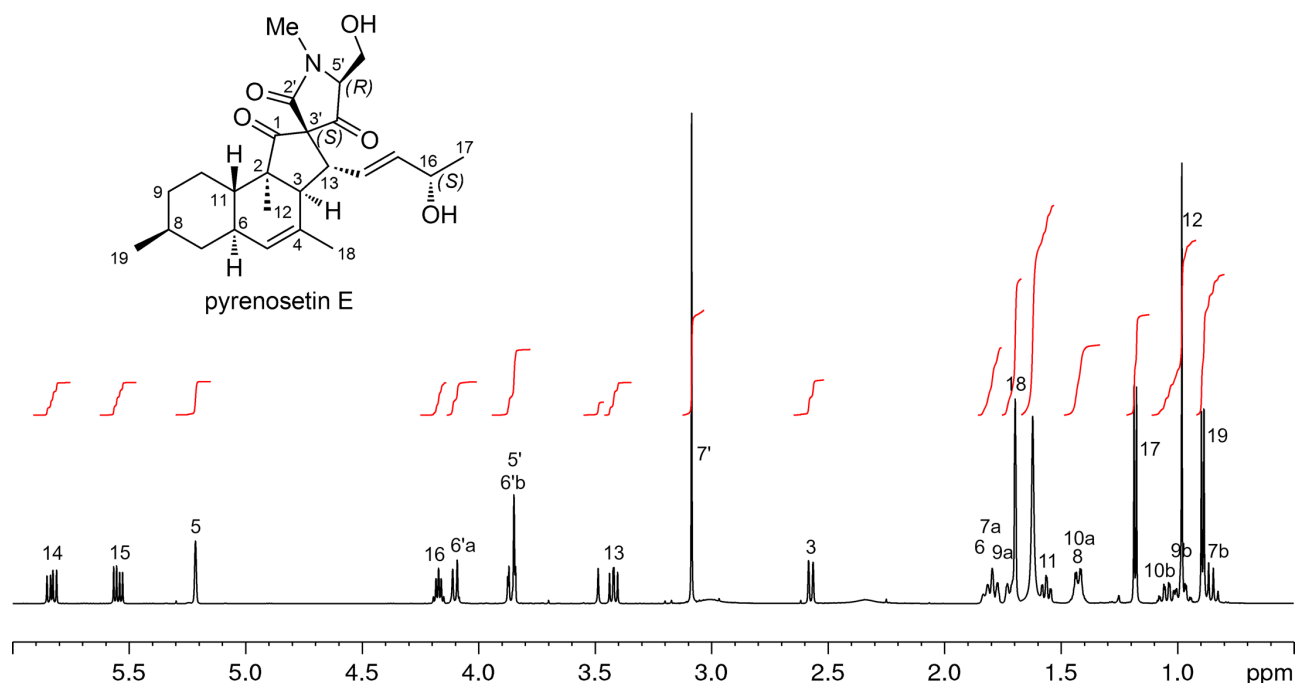

**Figure S3.**  $^1\text{H}$  NMR spectrum of pyrenosetin E (5) (600 MHz,  $\text{CDCl}_3$ )

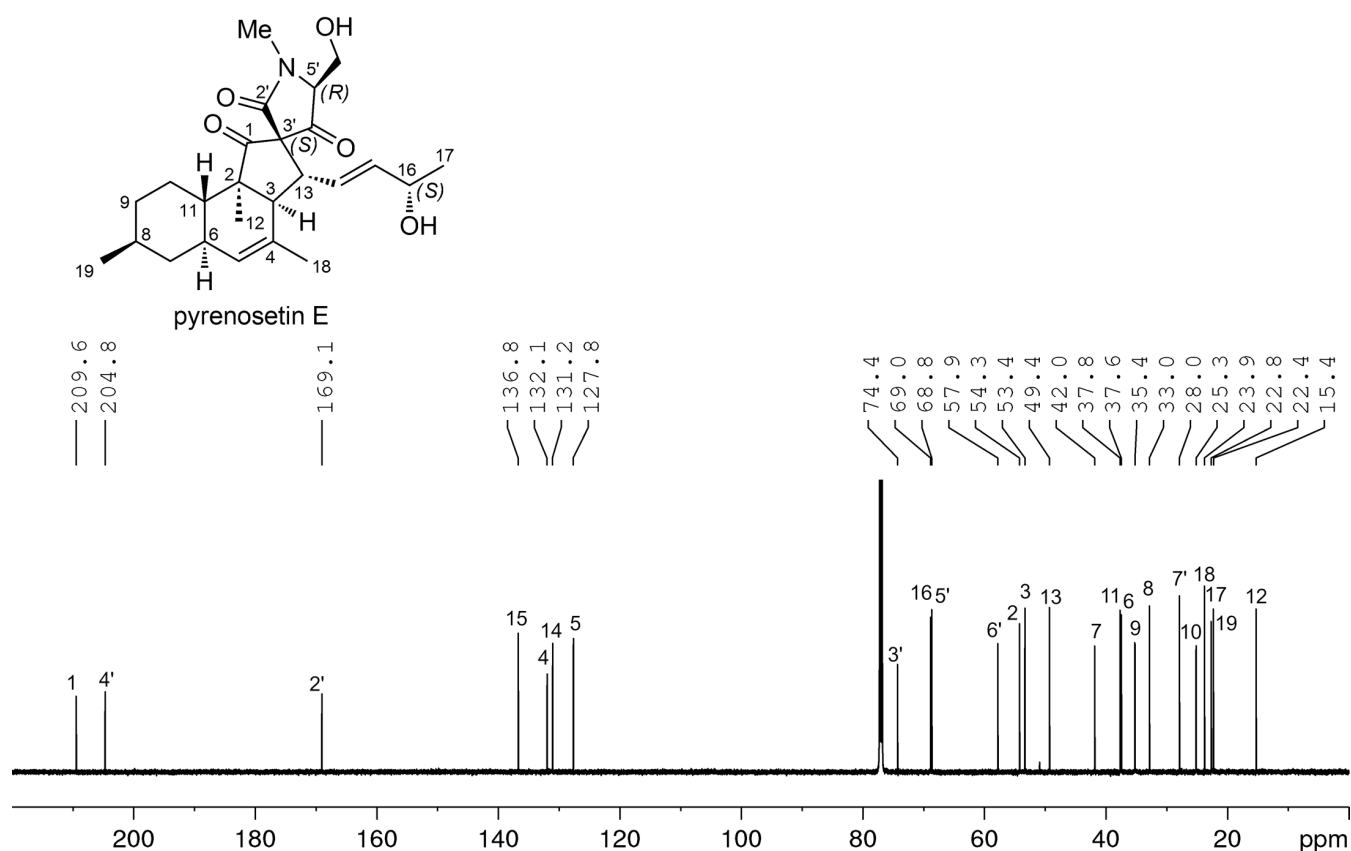

**Figure S4.**  $^{13}\text{C}$  NMR spectrum of pyrenosetin E (5) (150 MHz,  $\text{CDCl}_3$ )

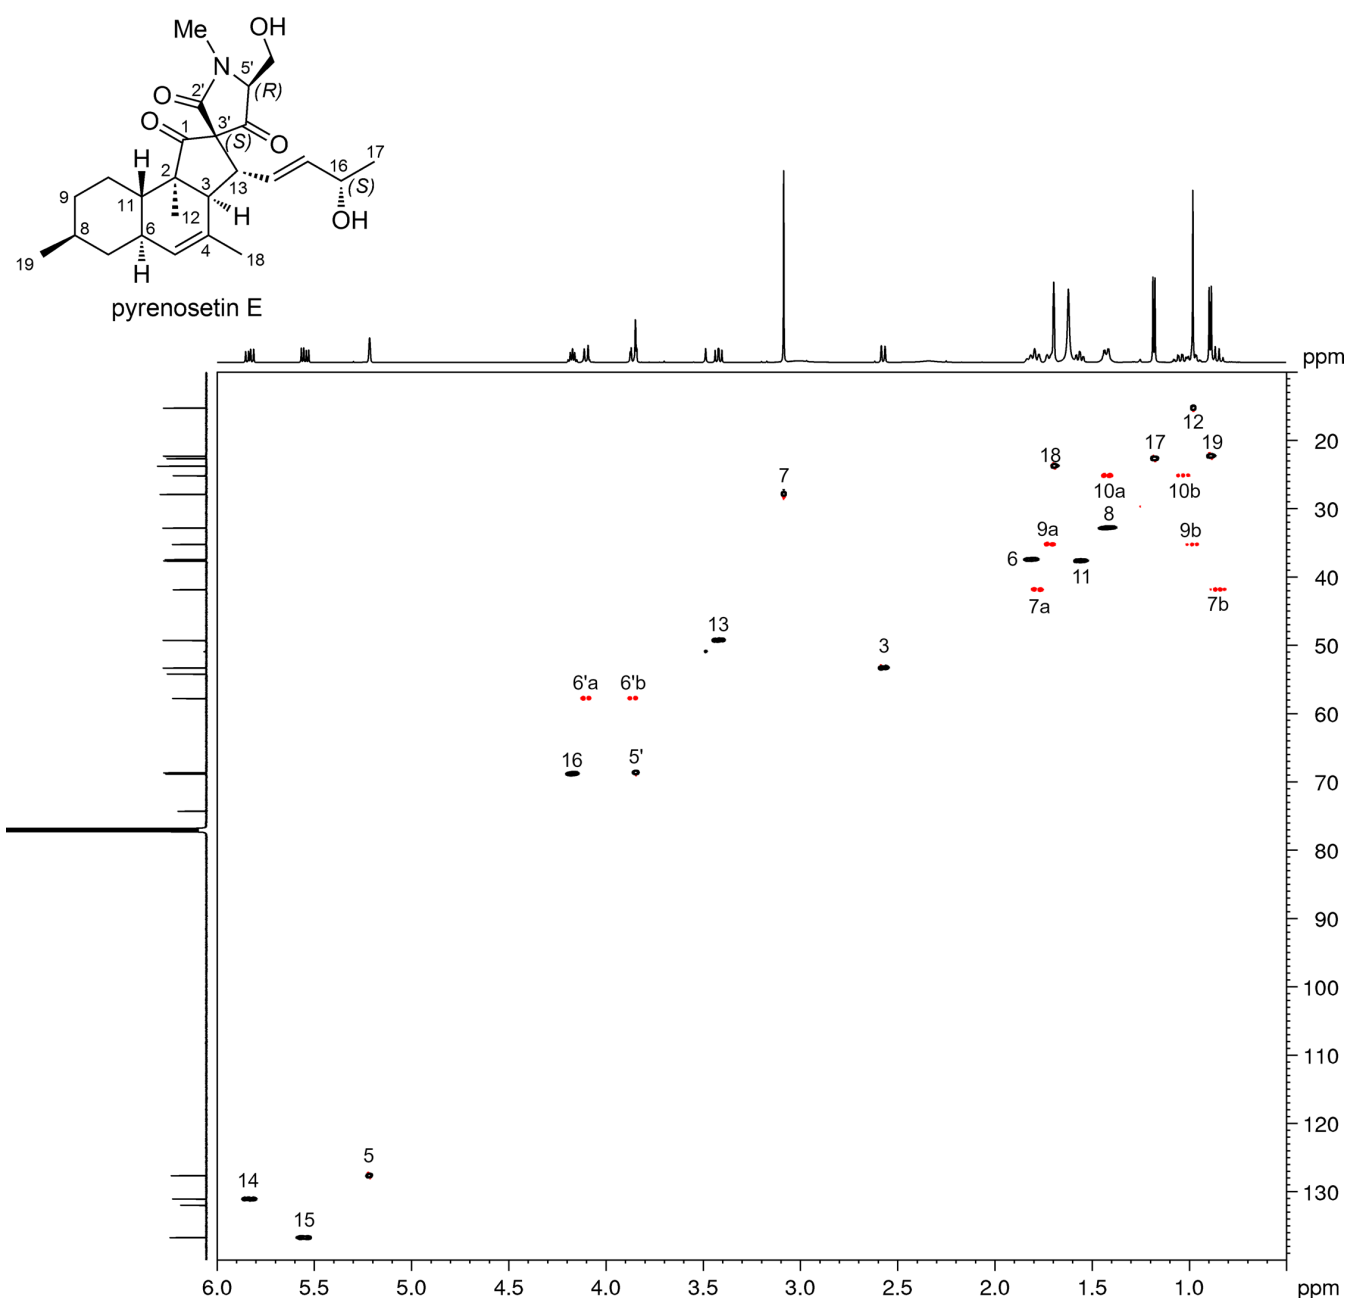

Figure S5. DEPT-HSQC spectrum of pyrenosetin E (5) (600 MHz,  $\text{CDCl}_3$ )

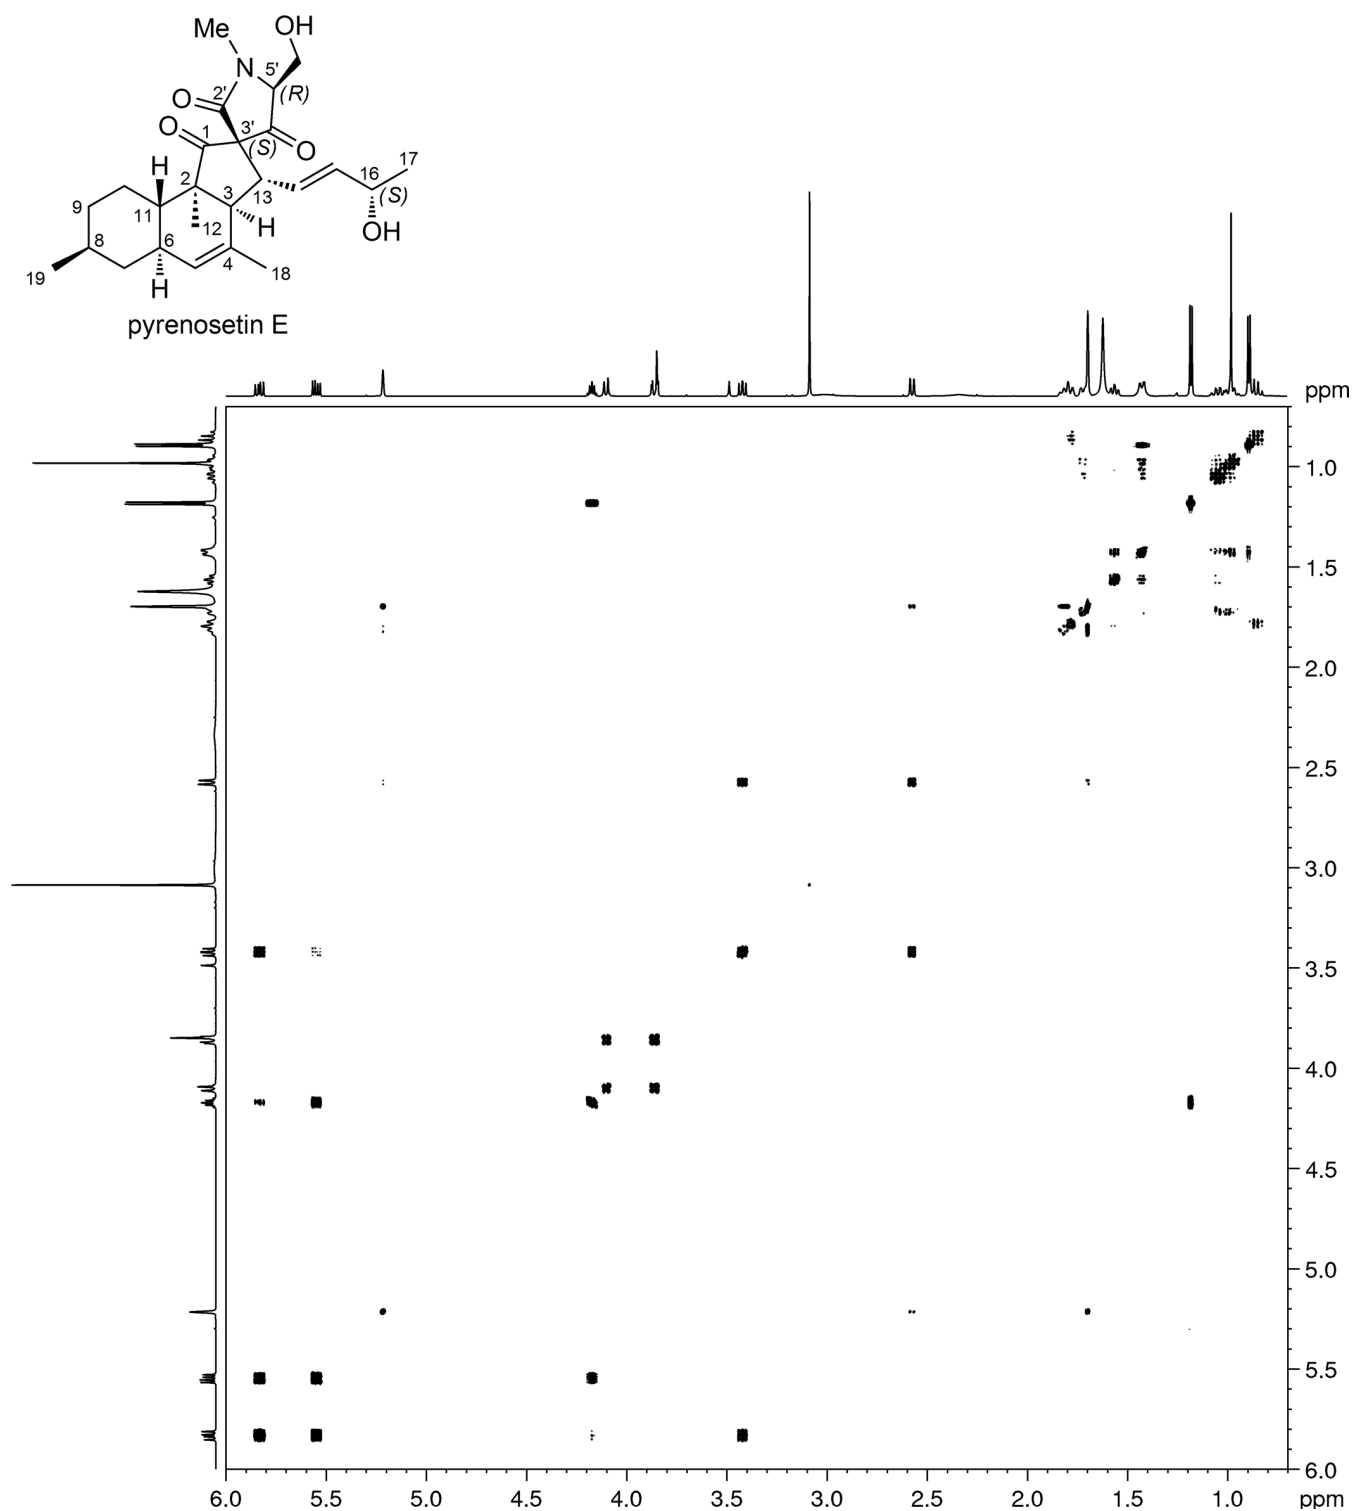

**Figure S6.** COSY spectrum of pyrenosetin E (5) (600 MHz, CDCl<sub>3</sub>)

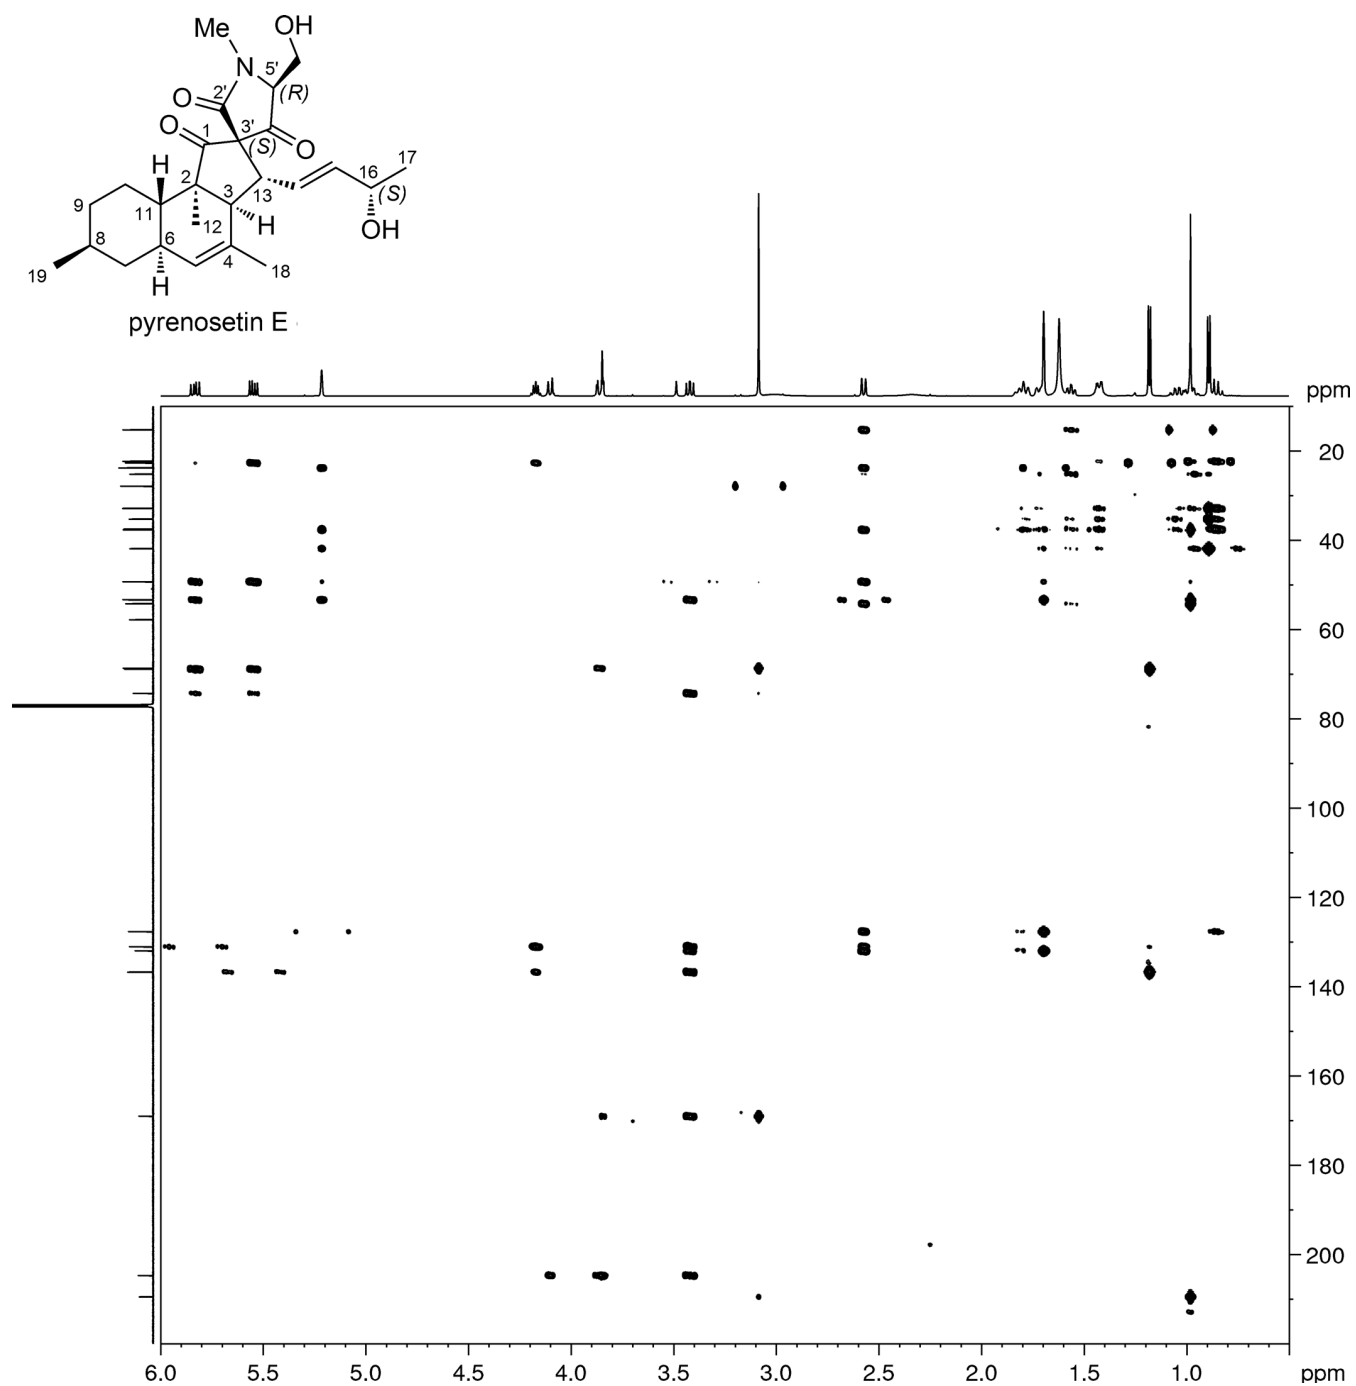

**Figure S7.** HMBC spectrum of pyrenosetin E (5) (600 MHz, CDCl<sub>3</sub>)



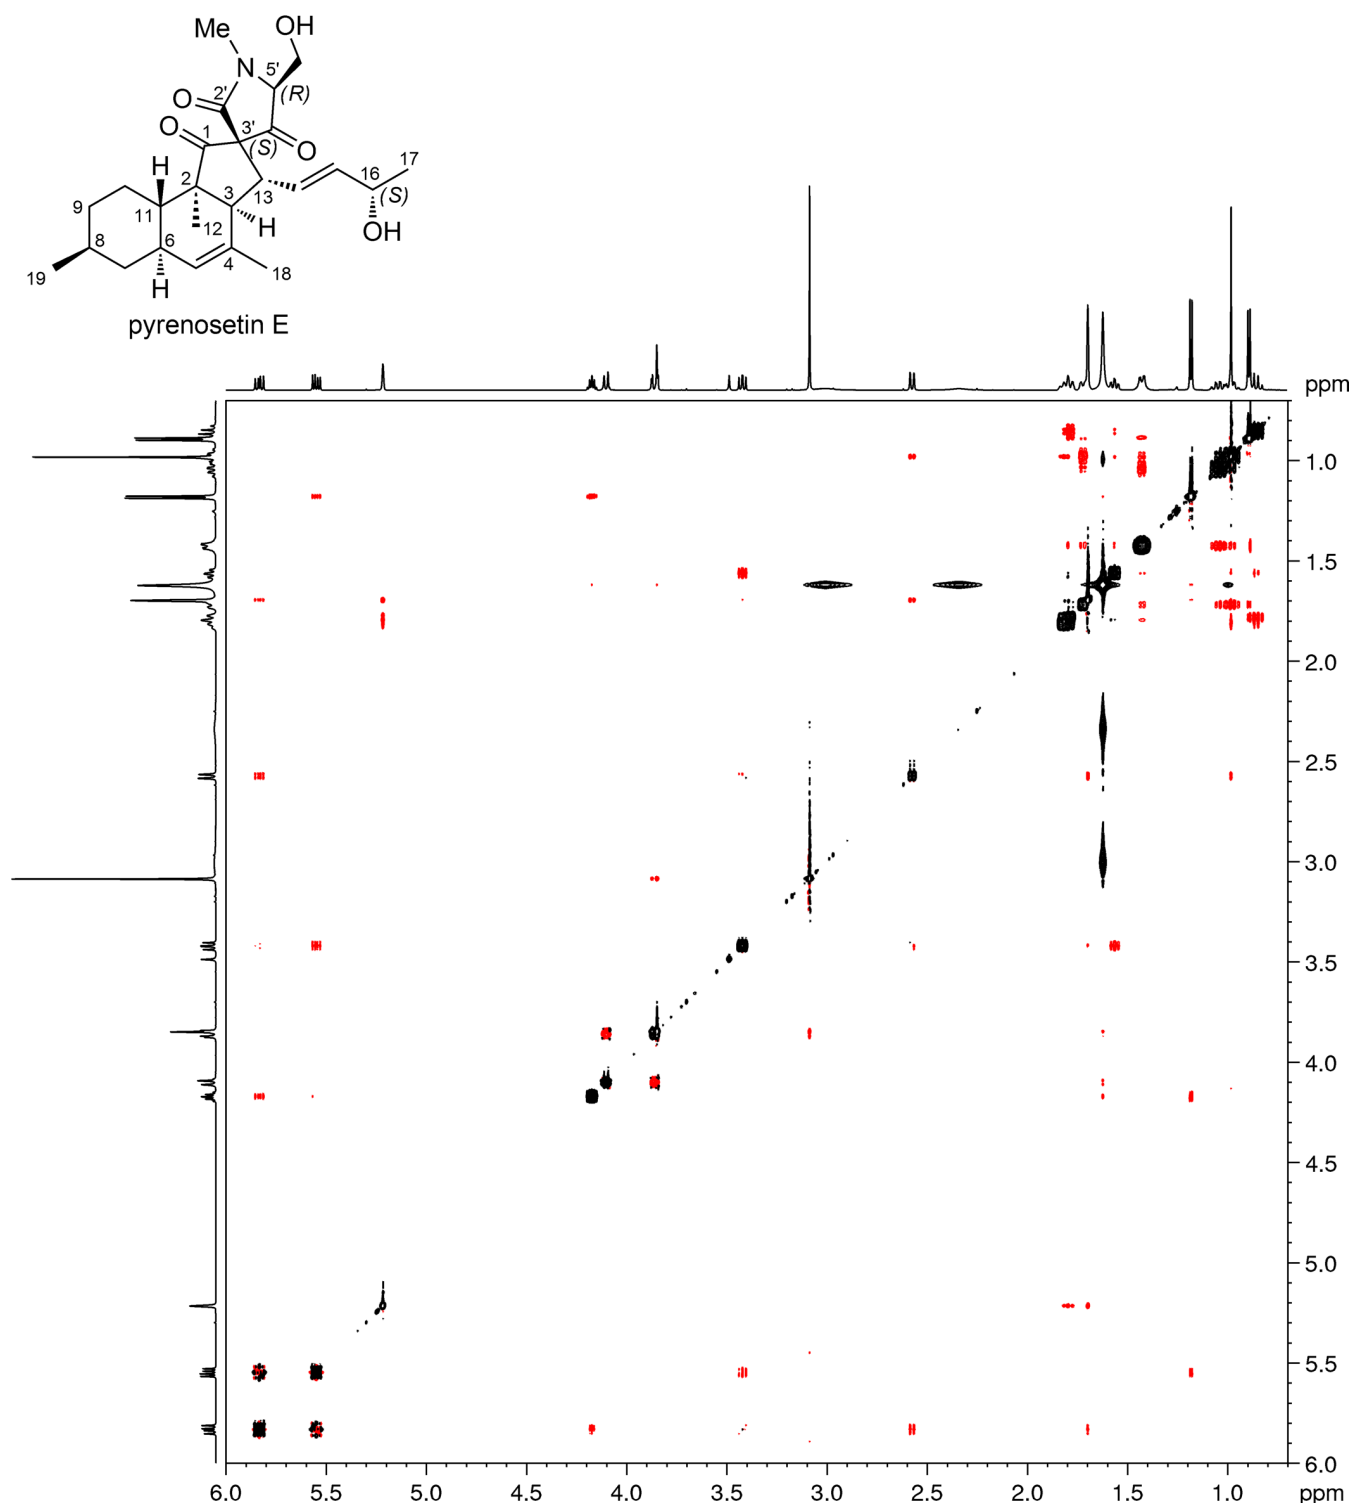

**Figure S8.** NOESY spectrum of pyrenosetin E (4) (600 MHz, CDCl<sub>3</sub>)

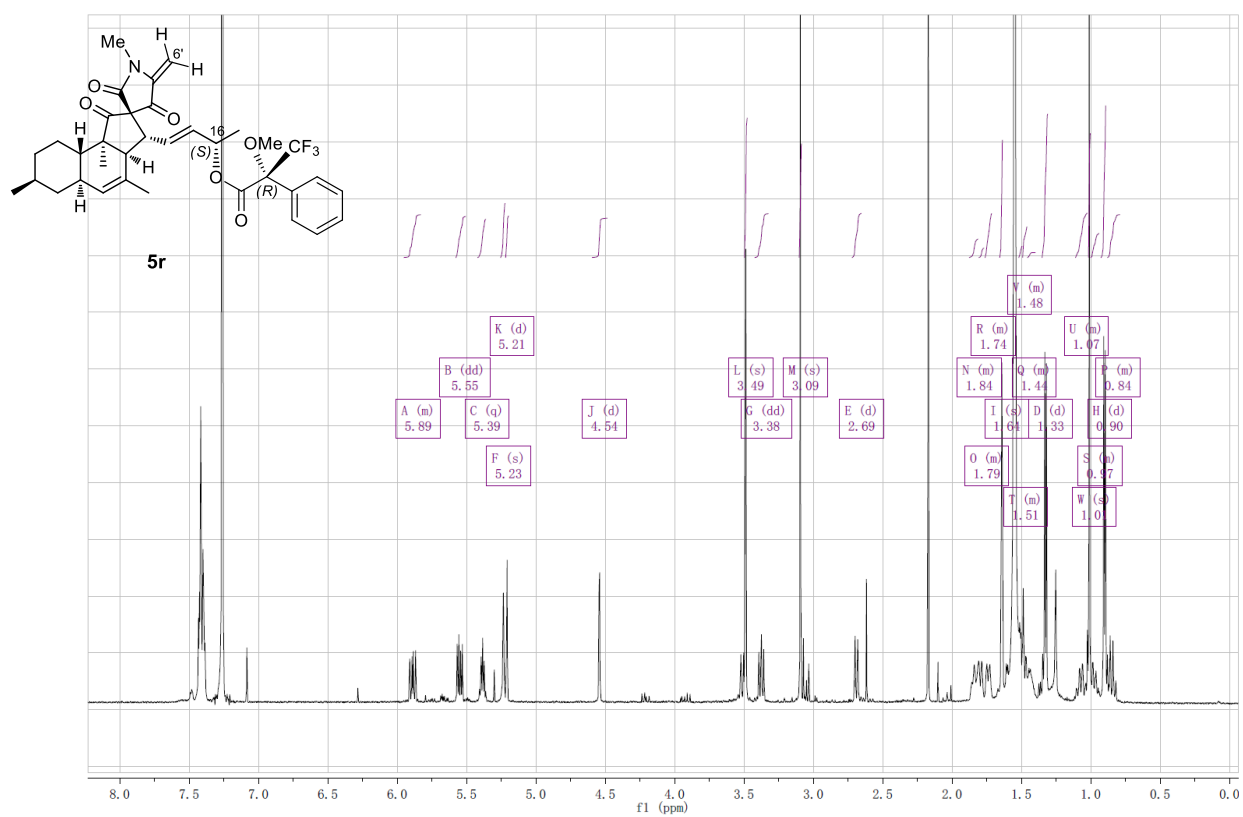

**Figure S9.**  $^1\text{H}$  NMR spectrum of 16O-(*R*)-MTPA ester of dehydrated pyrenosetin E (**5r**) (600M Hz,  $\text{CDCl}_3$ )

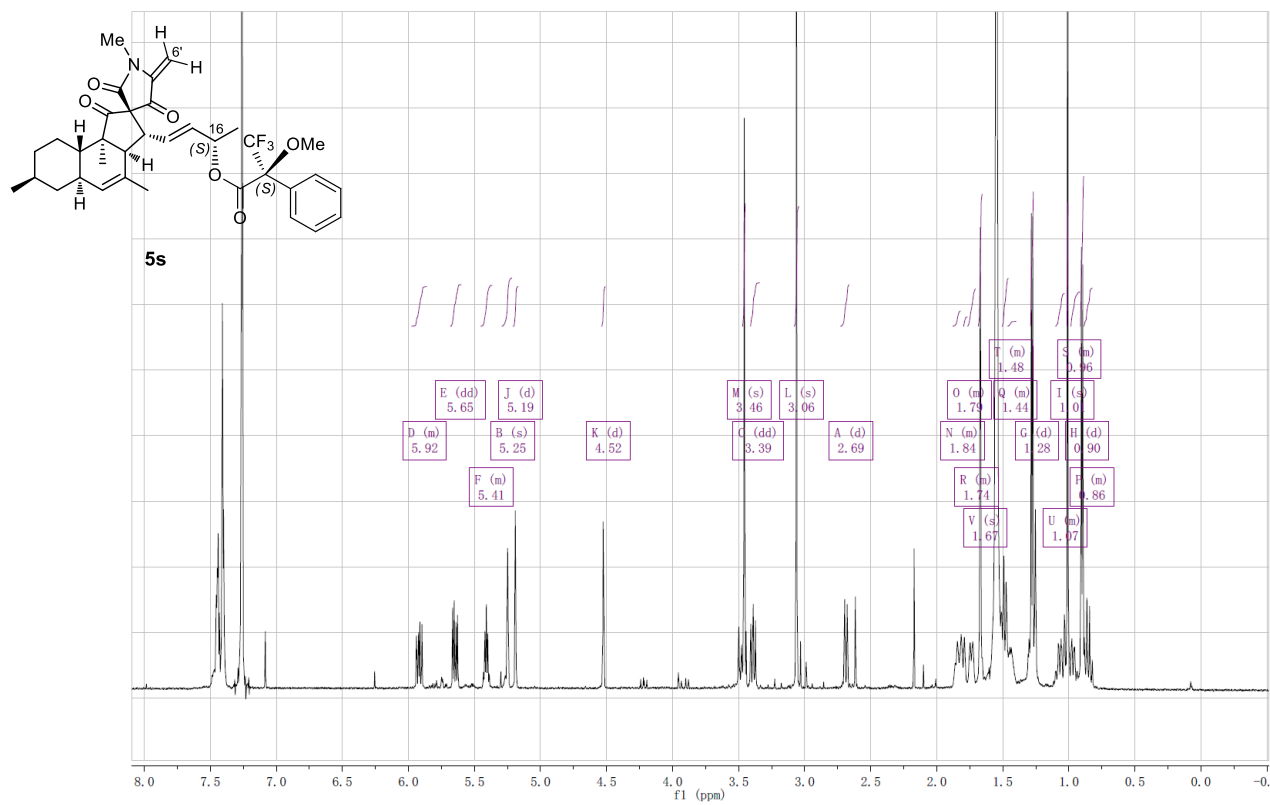

**Figure S10.**  $^1\text{H}$  NMR spectrum of 16O-(S)-MTPA ester of dehydrated pyrenosetin E (**5s**) (600MHz,  $\text{CDCl}_3$ )

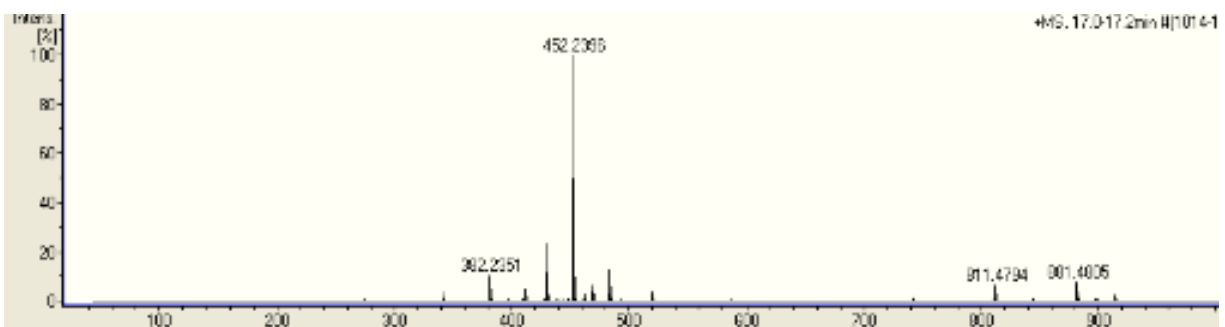

**Figure S11.** High-resolution ESI mass spectrum of pyrenosetin E (5) (positive ion mode).

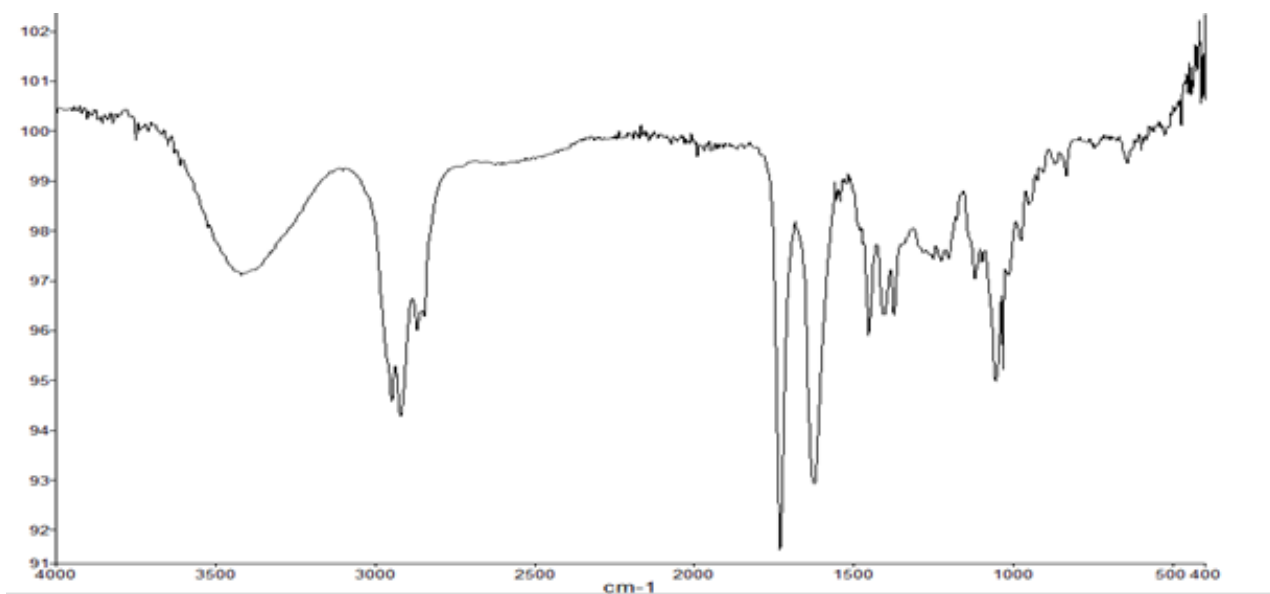

**Figure S12.** FT-IR spectrum of pyrenosetin E (5)

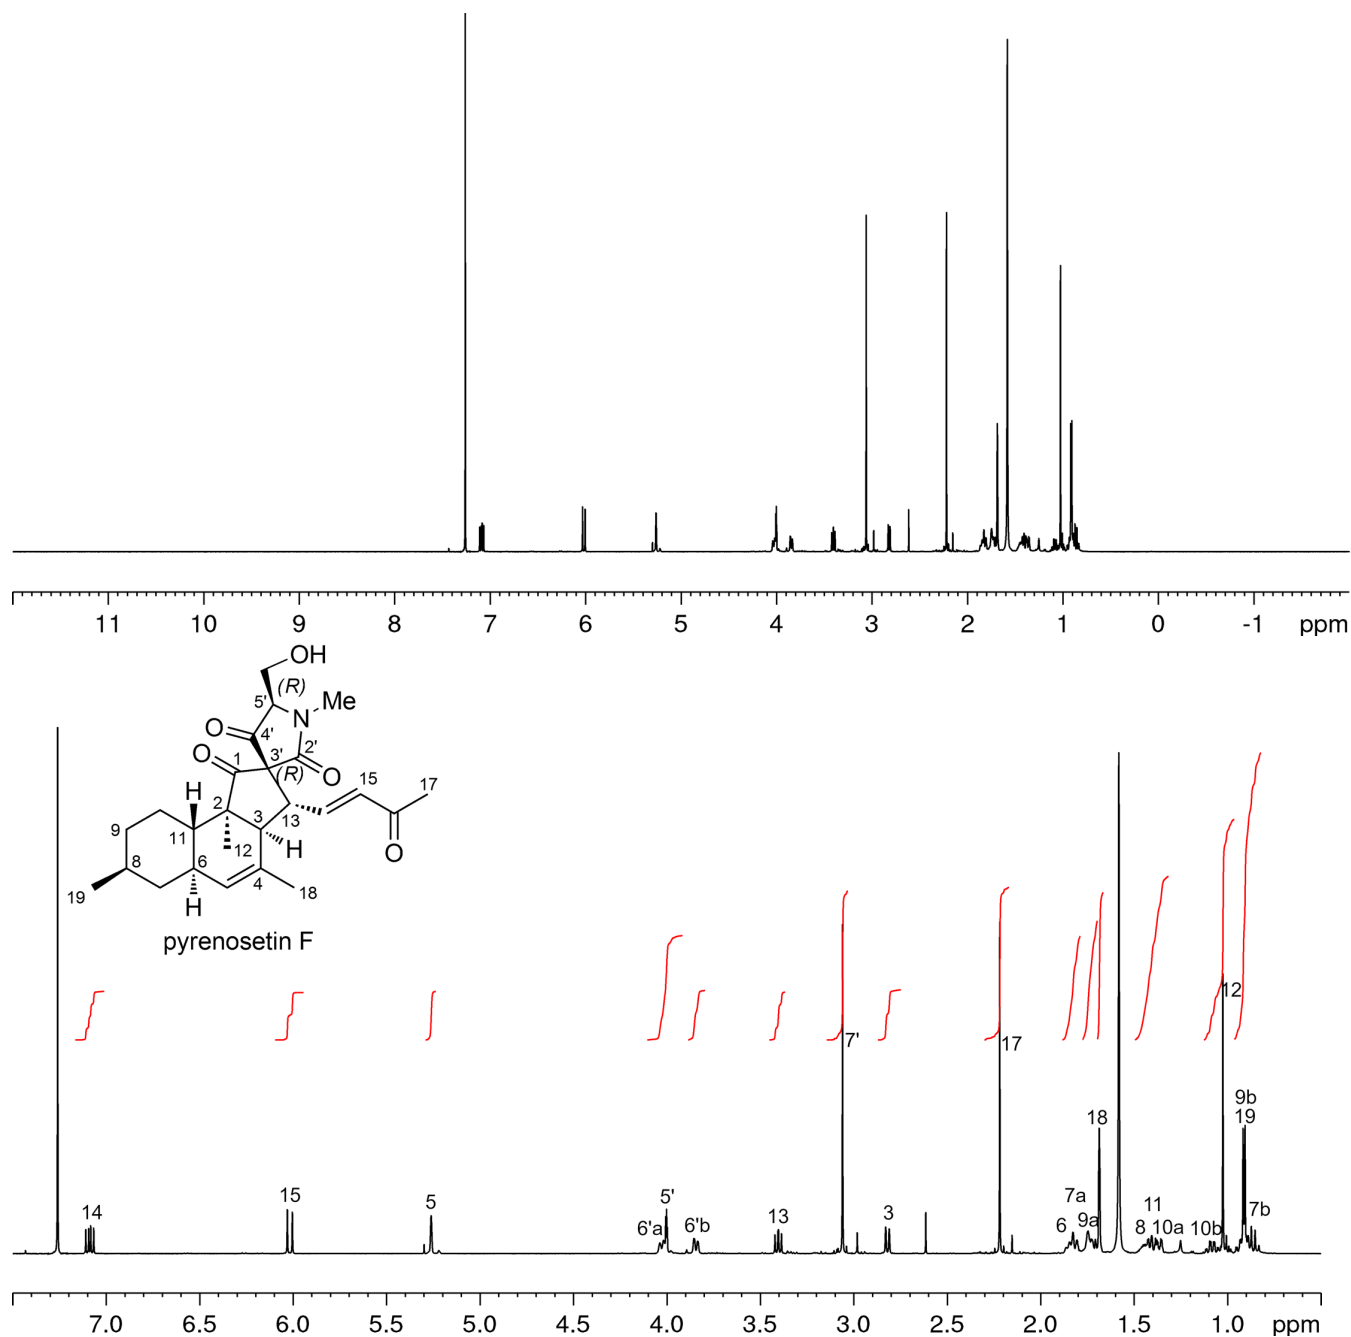

**Figure S13.**  $^1\text{H}$  NMR spectrum of pyrenosetin F (6) (600 MHz,  $\text{CDCl}_3$ )

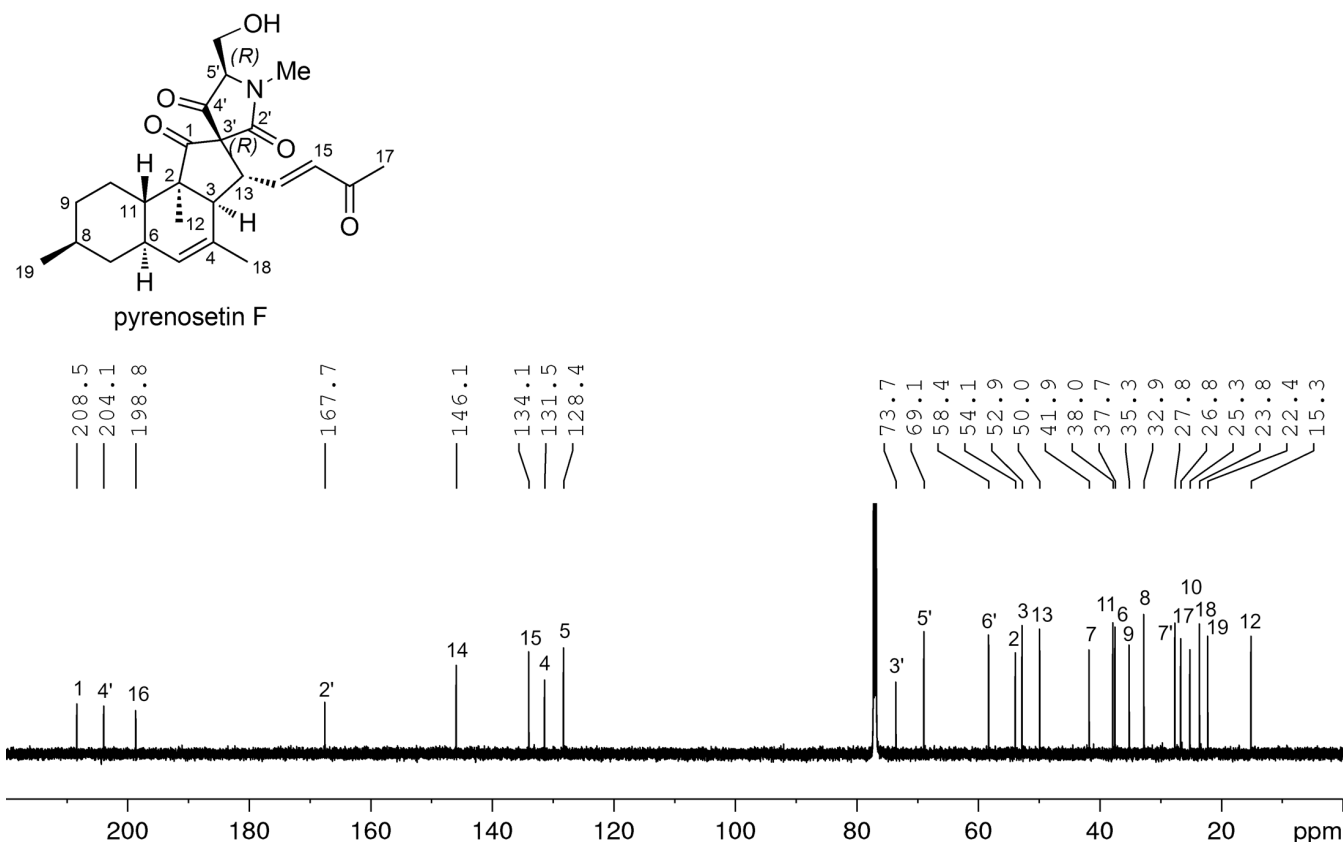

**Figure S14.**  $^{13}\text{C}$  NMR spectrum of pyrenosetin F (6) (150 MHz,  $\text{CDCl}_3$ )

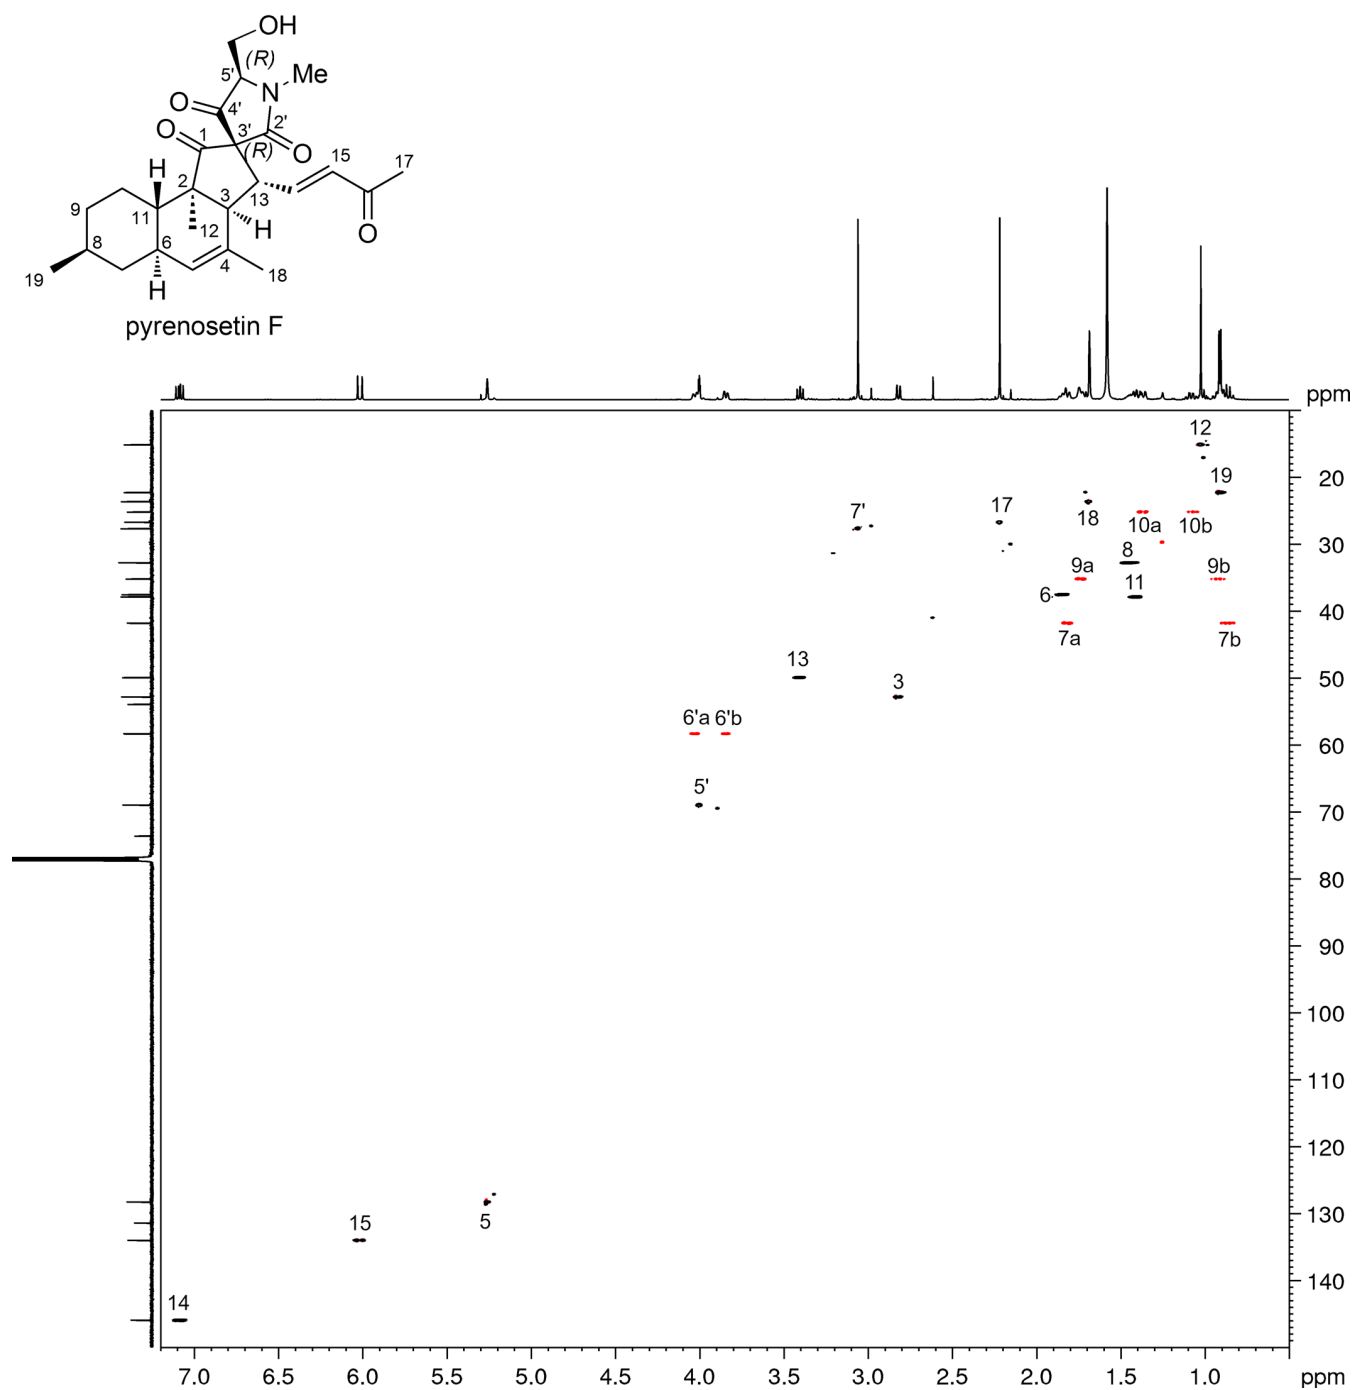

Figure S15. DEPT-HSQC spectrum of pyrenosetin F (6) (600 MHz,  $\text{CDCl}_3$ )

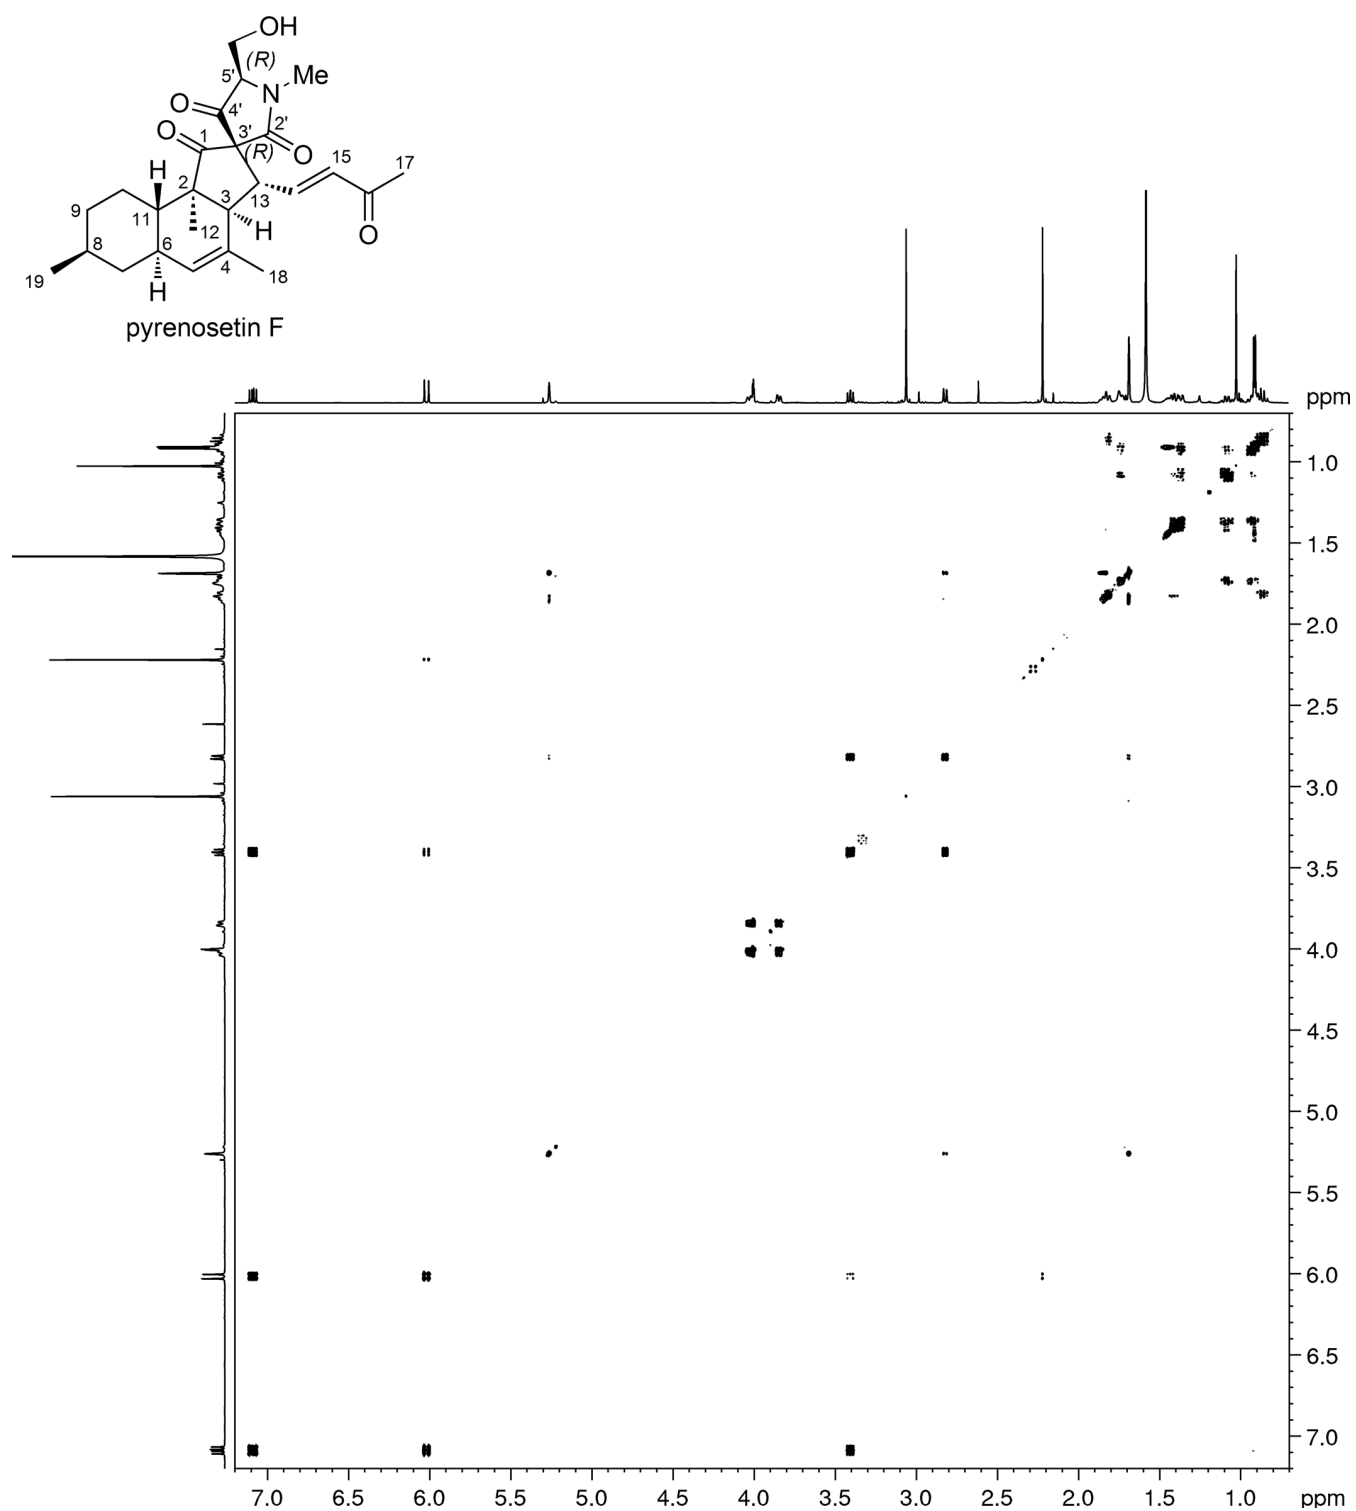

**Figure S16.** COSY spectrum of pyrenosetin F (6) (600 MHz, CDCl<sub>3</sub>)



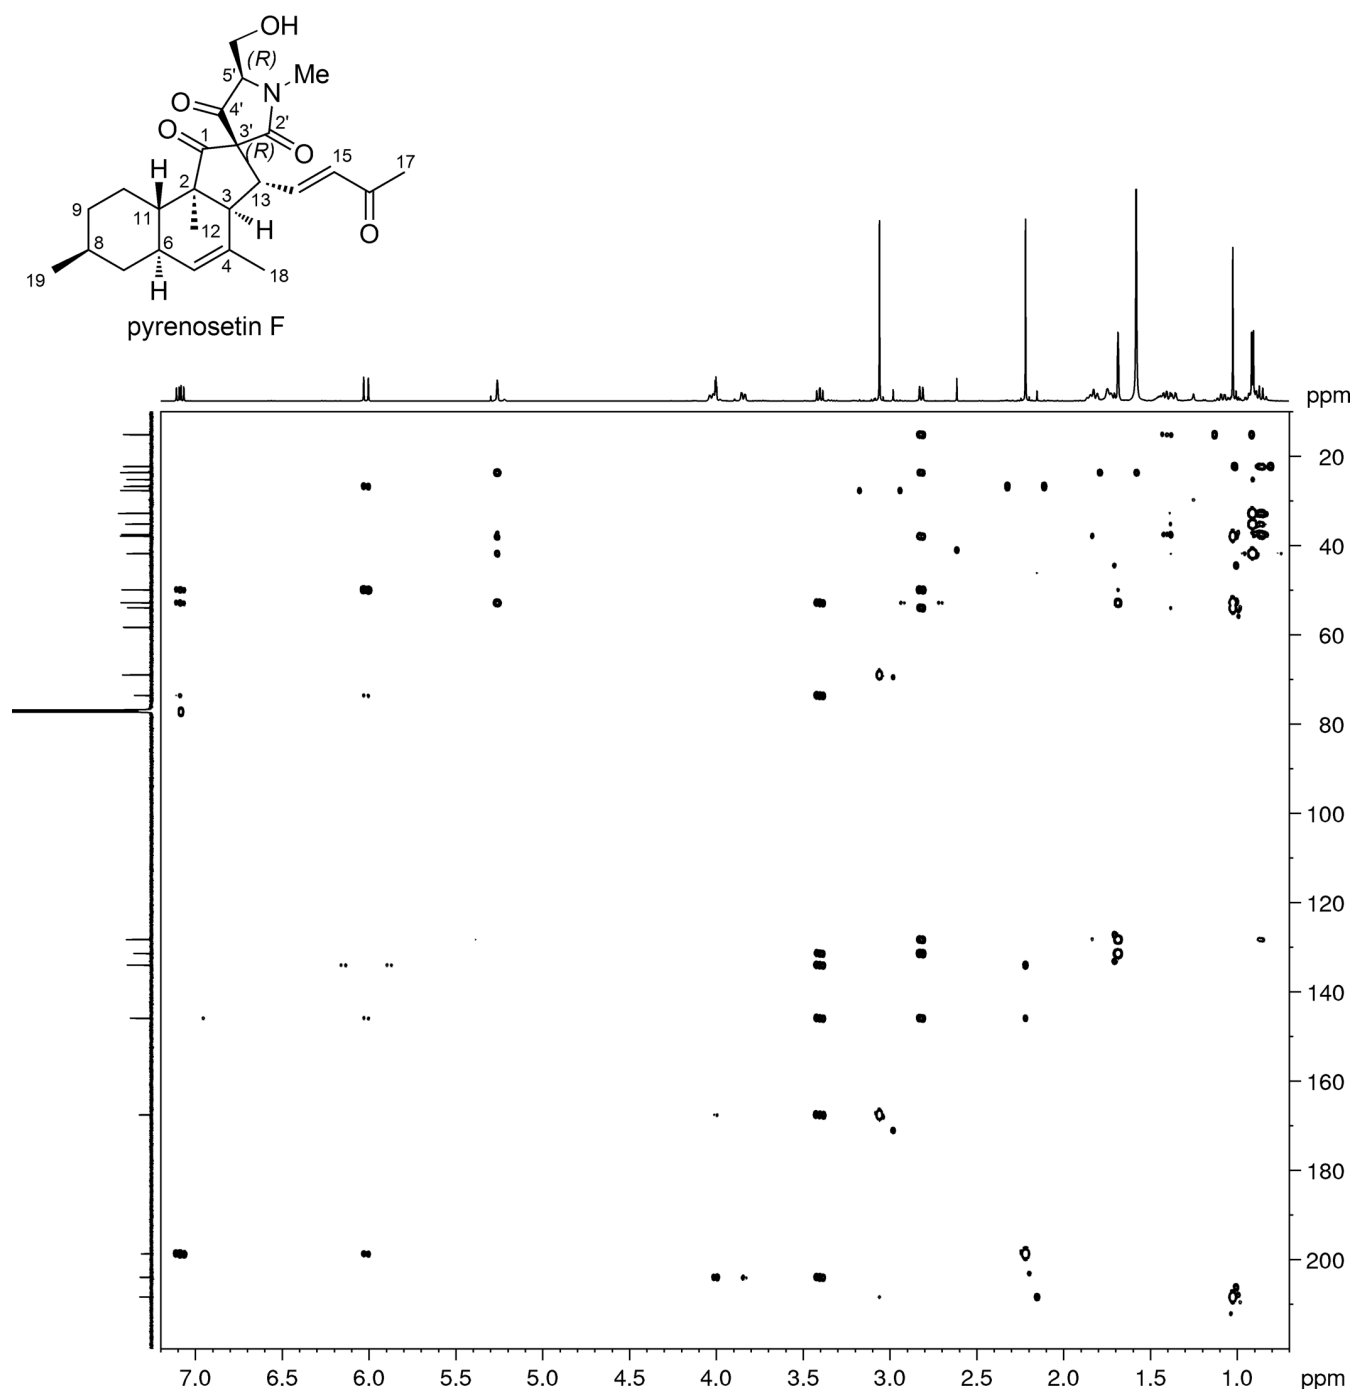

**Figure S17.** HMBC spectrum of pyrenosetin F (**6**) (600 MHz, CDCl<sub>3</sub>)

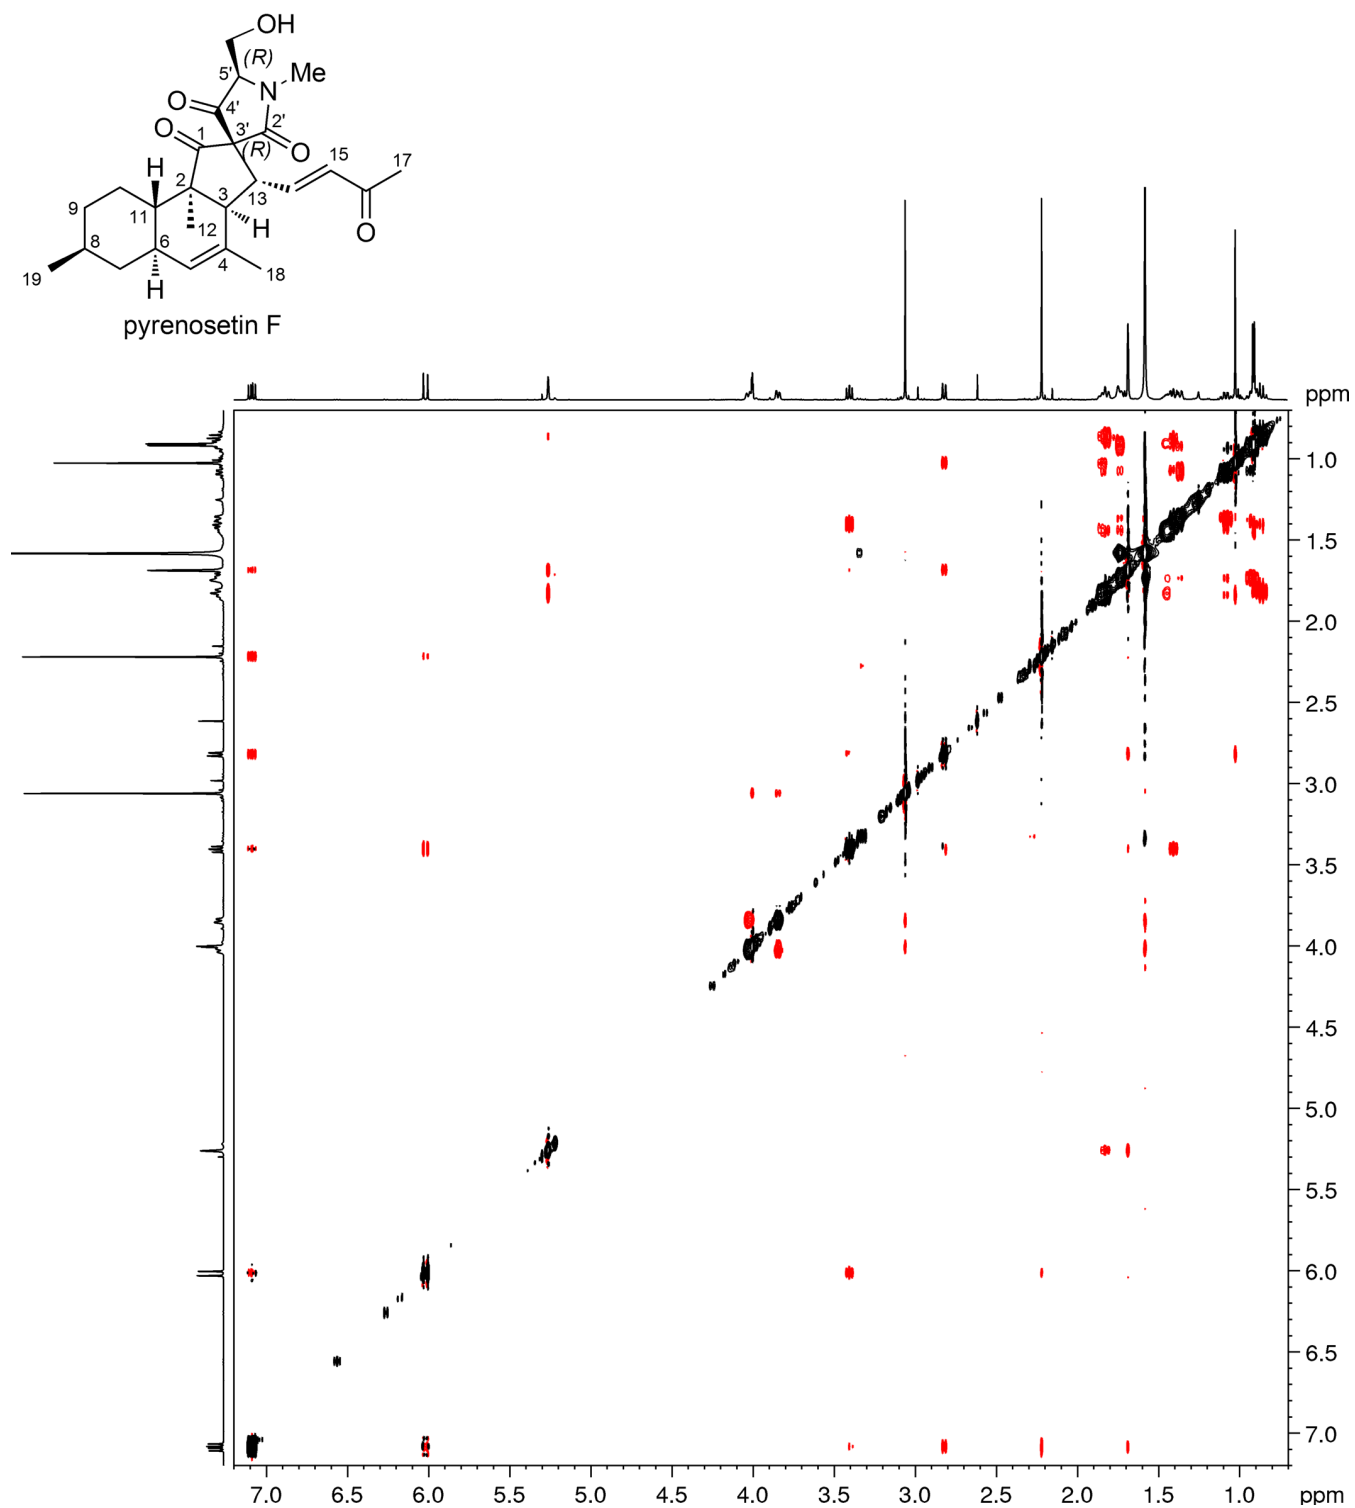

**Figure S18.** NOESY spectrum of pyrenosetin F (6) (600 MHz, CDCl<sub>3</sub>)

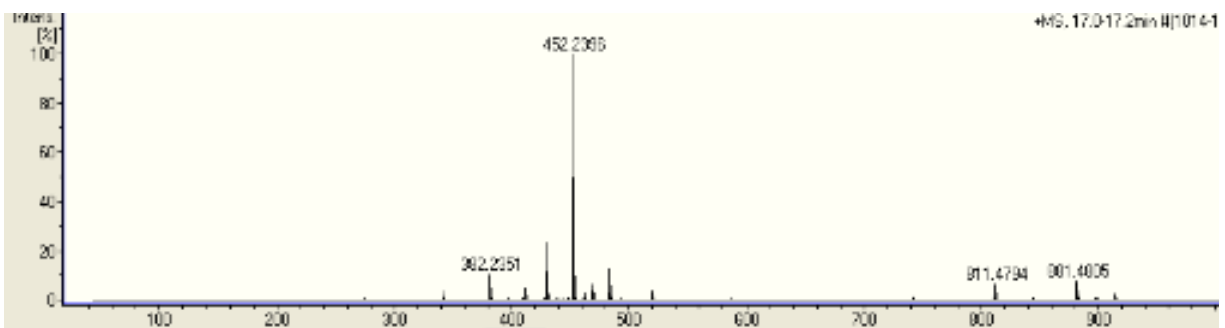

**Figure S19.** High-resolution ESI mass spectrum of pyrenosetin F (6) (positive ion mode).

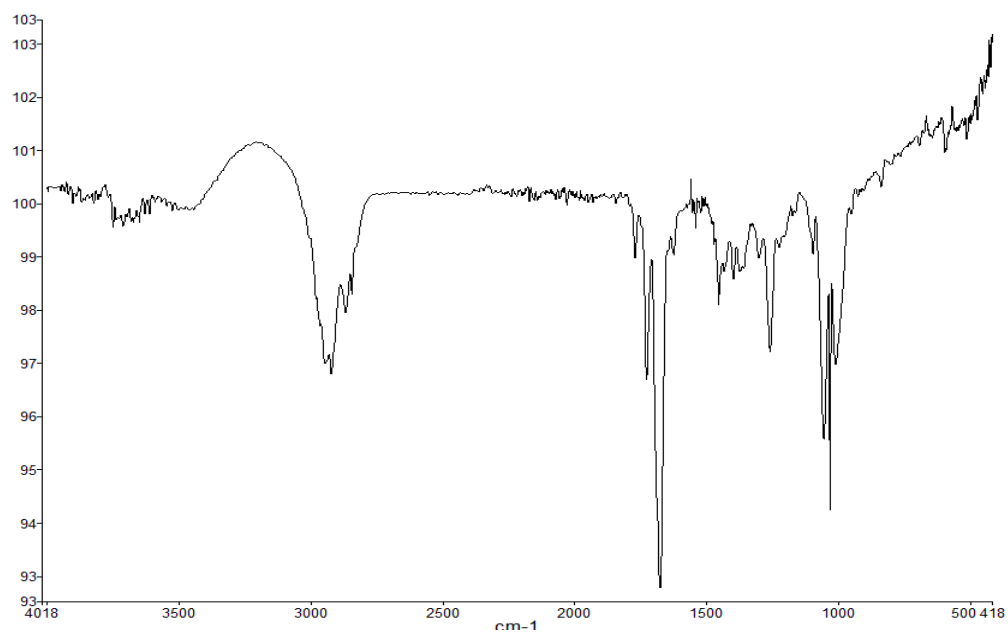

**Figure S20.** FT-IR spectrum of pyrenosetin F (6)

| Functional       | Solvent? |         | Basis Set?   |         | Type of Data      |          |
|------------------|----------|---------|--------------|---------|-------------------|----------|
| mPW1PW91         | PCM      |         | 6-311+G(d,p) |         | Shielding Tensors |          |
|                  | 3'R,5'R  | 3'S,5'R | 3'R,5'S      | 3'S,5'S | Isomer 5          | Isomer 6 |
| sDP4+ (H data)   | 1.94%    | 30.30%  | 2.27%        | 65.49%  | -                 | -        |
| sDP4+ (C data)   | 21.68%   | 0.13%   | 0.03%        | 78.16%  | -                 | -        |
| sDP4+ (all data) | 0.82%    | 0.07%   | 0.00%        | 99.11%  | -                 | -        |
| uDP4+ (H data)   | 12.73%   | 11.65%  | 1.57%        | 74.05%  | -                 | -        |
| uDP4+ (C data)   | 8.88%    | 0.00%   | 0.00%        | 91.12%  | -                 | -        |
| uDP4+ (all data) | 1.65%    | 0.00%   | 0.00%        | 98.35%  | -                 | -        |
| DP4+ (H data)    | 0.47%    | 6.75%   | 0.07%        | 92.71%  | -                 | -        |
| DP4+ (C data)    | 2.63%    | 0.00%   | 0.00%        | 97.37%  | -                 | -        |
| DP4+ (all data)  | 0.01%    | 0.00%   | 0.00%        | 99.99%  | -                 | -        |

Figure S21. DP4+ results for pyrenosetin E (5).

| Functional       | Solvent? |         | Basis Set?   |         | Type of Data      |          |
|------------------|----------|---------|--------------|---------|-------------------|----------|
| mPW1PW91         | PCM      |         | 6-311+G(d,p) |         | Shielding Tensors |          |
|                  | 3'R,5'R  | 3'S,5'R | 3'R,5'S      | 3'S,5'S | Isomer 5          | Isomer 6 |
| sDP4+ (H data)   | 13.54%   | 24.05%  | 43.28%       | 19.13%  | -                 | -        |
| sDP4+ (C data)   | 84.81%   | 0.28%   | 0.23%        | 14.67%  | -                 | -        |
| sDP4+ (all data) | 79.42%   | 0.47%   | 0.70%        | 19.40%  | -                 | -        |
| uDP4+ (H data)   | 92.28%   | 0.77%   | 1.54%        | 5.42%   | -                 | -        |
| uDP4+ (C data)   | 15.20%   | 0.04%   | 0.00%        | 84.76%  | -                 | -        |
| uDP4+ (all data) | 75.34%   | 0.00%   | 0.00%        | 24.66%  | -                 | -        |
| DP4+ (H data)    | 86.88%   | 1.28%   | 4.64%        | 7.20%   | -                 | -        |
| DP4+ (C data)    | 50.90%   | 0.00%   | 0.00%        | 49.10%  | -                 | -        |
| DP4+ (all data)  | 92.60%   | 0.00%   | 0.00%        | 7.40%   | -                 | -        |

Figure S22. DP4+ results for pyrenosetin F (6).

| Functional       | Solvent? |         | Basis Set?   |         | Type of Data      |          |
|------------------|----------|---------|--------------|---------|-------------------|----------|
| mPW1PW91         | PCM      |         | 6-311+G(d,p) |         | Shielding Tensors |          |
|                  | 3'R,5'R  | 3'S,5'R | 3'R,5'S      | 3'S,5'S | Isomer 5          | Isomer 6 |
| sDP4+ (H data)   | 0.01%    | 99.32%  | 0.21%        | 0.46%   | -                 | -        |
| sDP4+ (C data)   | 2.69%    | 71.00%  | 13.43%       | 12.87%  | -                 | -        |
| sDP4+ (all data) | 0.00%    | 99.88%  | 0.04%        | 0.08%   | -                 | -        |
| uDP4+ (H data)   | 0.69%    | 93.80%  | 4.48%        | 1.03%   | -                 | -        |
| uDP4+ (C data)   | 1.35%    | 1.62%   | 0.02%        | 97.02%  | -                 | -        |
| uDP4+ (all data) | 0.37%    | 60.24%  | 0.03%        | 39.37%  | -                 | -        |
| DP4+ (H data)    | 0.00%    | 99.98%  | 0.01%        | 0.01%   | -                 | -        |
| DP4+ (C data)    | 0.26%    | 8.43%   | 0.01%        | 91.29%  | -                 | -        |
| DP4+ (all data)  | 0.00%    | 99.94%  | 0.00%        | 0.06%   | -                 | -        |

Figure S23. DP4+ results for pyrenosetin C (3).

**Table S1.** Putatively identified compounds by MN-based dereplication of KC subextracts of *Pyrenochaetopsis* sp. strains FVE-001 and FVE-087. Annotation considered the putative ID, retention time ( $t_R$ ),  $m/z$  value, adduct, chemical structure, molecular formula, and MS/MS fragments.

| Putative ID                     | $t_R$<br>(min) | Precursor $m/z$<br>(adduct)                     | Chemical structure                                                                  | Molecular formula<br>( $\Delta$ ppm)                      | MS/MS fragmentation                                          |
|---------------------------------|----------------|-------------------------------------------------|-------------------------------------------------------------------------------------|-----------------------------------------------------------|--------------------------------------------------------------|
| Stereoisomer of phomasetin      | 10.34          | 414.2643<br>[M+H] <sup>+</sup>                  | 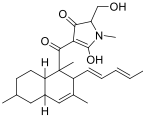   | C <sub>25</sub> H <sub>36</sub> NO <sub>4</sub><br>(0.1)  | 396.2635;<br>346.1981;<br>328.1932;<br>215.1779<br>170.0448  |
| Phomasetin?                     | 10.10          | 414.3252<br>[M+H] <sup>+</sup>                  |    | C <sub>25</sub> H <sub>36</sub> NO <sub>4</sub><br>(60.8) | 396.2533;<br>346.2022;<br>243.2124;<br>215.1813;<br>170.0458 |
| Phomasetin?                     | 10.10          | 414.2649<br>[M+H] <sup>+</sup>                  |    | C <sub>25</sub> H <sub>36</sub> NO <sub>4</sub><br>(0.5)  | 396.2543;<br>346.2011;<br>215.1797;<br>170.0451              |
| Phomasetin                      | 10.10          | 414.2631<br>[M+H] <sup>+</sup>                  |    | C <sub>25</sub> H <sub>36</sub> NO <sub>4</sub><br>(-13)  | 396.2543;<br>346.2026;<br>215.1808;<br>170.0460              |
| Pyrenosetin A                   | 7.55           | 412.2484<br>[M-H <sub>2</sub> O+H] <sup>+</sup> |   | C <sub>25</sub> H <sub>34</sub> NO <sub>4</sub><br>(-0.4) | 394.2369<br>384.2527;<br>210.1128                            |
| Stereoisomer of pyrenosetin A/B | 7.52           | 412.2484<br>[M-H <sub>2</sub> O+H] <sup>+</sup> |  | C <sub>25</sub> H <sub>34</sub> NO <sub>4</sub><br>(-0.4) | 394.2378;<br>384.2539;<br>210.1138;<br>175.1488              |
| Stereoisomer of pyrenosetin A/B | 7.98           | 412.2484<br>[M-H <sub>2</sub> O+H] <sup>+</sup> |  | C <sub>25</sub> H <sub>34</sub> NO <sub>4</sub><br>(-0.4) | 394.2367;<br>384.2543;<br>210.1136                           |
| Stereoisomer of pyrenosetin A/B | 7.28           | 412.2484<br>[M-H <sub>2</sub> O+H] <sup>+</sup> |  | C <sub>25</sub> H <sub>34</sub> NO <sub>4</sub><br>(-0.4) | 394.2382;<br>384.2534;<br>210.1134                           |
| Stereoisomer of pyrenosetin A/B | 7.50           | 412.2479<br>[M-H <sub>2</sub> O+H] <sup>+</sup> |  | C <sub>25</sub> H <sub>34</sub> NO <sub>4</sub><br>(-0.9) | 394.2382;<br>384.2534;<br>210.1131                           |
| Stereoisomer of pyrenosetin A/B | 7.00           | 412.2483<br>[M-H <sub>2</sub> O+H] <sup>+</sup> |  | C <sub>25</sub> H <sub>34</sub> NO <sub>4</sub><br>(-0.5) | 394.2365;<br>384.2543;<br>210.1124                           |
| Stereoisomer of pyrenosetin A/B | 8.43           | 412.2490<br>[M-H <sub>2</sub> O+H] <sup>+</sup> |  | C <sub>25</sub> H <sub>34</sub> NO <sub>4</sub><br>(0.2)  | 394.2372;<br>384.2547;<br>210.1143;<br>175.1490              |
| Stereoisomer of pyrenosetin A/B | 7.79           | 412.2482<br>[M-H <sub>2</sub> O+H] <sup>+</sup> |  | C <sub>25</sub> H <sub>34</sub> NO <sub>4</sub><br>(-0.6) | 394.2373;<br>384.2538;<br>210.1138;                          |

|                                    |      |                                                 |                                                                                     |                                                           |                                                                                        |
|------------------------------------|------|-------------------------------------------------|-------------------------------------------------------------------------------------|-----------------------------------------------------------|----------------------------------------------------------------------------------------|
| Pyrenosetin B                      | 7.78 | 412.2488<br>[M-H <sub>2</sub> O+H] <sup>+</sup> | 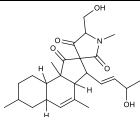   | C <sub>25</sub> H <sub>34</sub> NO <sub>4</sub><br>(0)    | 394.2374;<br>384.2545;<br>210.1146                                                     |
| Stereoisomer of<br>pyrenosetin A/B | 8.28 | 412.2482<br>[M-H <sub>2</sub> O+H] <sup>+</sup> |    | C <sub>25</sub> H <sub>34</sub> NO <sub>4</sub><br>(-0.6) | 394.2284;<br>384.2538;<br>210.1132<br>175.1473                                         |
| Stereoisomer of<br>pyrenosetin A/B | 9.15 | 412.2487<br>[M-H <sub>2</sub> O+H] <sup>+</sup> |    | C <sub>25</sub> H <sub>34</sub> NO <sub>4</sub><br>(-0.1) | 394.2350;<br>384.2532;<br>243.2121;<br>170.0458                                        |
| Stereoisomer of<br>pyrenosetin C   | 7.98 | 428.2425<br>[M+H] <sup>+</sup>                  |    | C <sub>25</sub> H <sub>34</sub> NO <sub>5</sub><br>(-1.2) | 410.2326;<br>400.2502;<br>368.2244<br>342.2072<br>226.1078;<br>144.0652                |
| Stereoisomer of<br>pyrenosetin C   | 7.07 | 428.2436<br>[M+H] <sup>+</sup>                  |    | C <sub>25</sub> H <sub>34</sub> NO <sub>5</sub><br>(-0.1) | 410.2374;<br>400.2409;<br>386.2320;<br>368.2212;<br>342.2043;<br>226.1096              |
| Pyrenosetin C                      | 7.87 | 428.2424<br>[M+H] <sup>+</sup>                  |    | C <sub>25</sub> H <sub>34</sub> NO <sub>5</sub><br>(-1.3) | 410.2322;<br>400.2450;<br>386.2346;<br>368.2229;<br>342.2070;<br>226.1101;<br>144.0666 |
| Pyrenosetin D                      | 7.01 | 446.2540<br>[M+H] <sup>+</sup>                  |   | C <sub>25</sub> H <sub>36</sub> NO <sub>6</sub><br>(-0.3) | 428.2442;<br>400.2463<br>386.2330;<br>368.2232;<br>342.2081<br>226.1077                |
| Wakodecaline A                     | 6.41 | 430.2582<br>[M-H <sub>2</sub> O+H] <sup>+</sup> |  | C <sub>25</sub> H <sub>36</sub> NO <sub>5</sub><br>(-1.3) | 412.2473;<br>311.2007;<br>265.1988;<br>120.0669                                        |
| Stereoisomer of<br>wakodecaline A  | 6.90 | 430.2586<br>[M-H <sub>2</sub> O+H] <sup>+</sup> |  | C <sub>25</sub> H <sub>36</sub> NO <sub>5</sub><br>(-0.4) | 412.2491;<br>311.2001;<br>283.2072;<br>120.0654                                        |
| Stereoisomer of<br>wakodecaline A  | 6.57 | 430.2586<br>[M-H <sub>2</sub> O+H] <sup>+</sup> |  | C <sub>25</sub> H <sub>36</sub> NO <sub>5</sub><br>(-0.4) | 412.2470;<br>311.2004;<br>283.2058;<br>265.1949;<br>120.0665                           |

|                                   |      |                                |                                                                                   |                                                           |                                                              |
|-----------------------------------|------|--------------------------------|-----------------------------------------------------------------------------------|-----------------------------------------------------------|--------------------------------------------------------------|
| Wakodecaline B                    | 6.81 | 446.2538<br>[M+H] <sup>+</sup> | 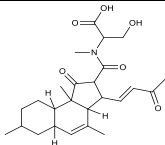 | C <sub>25</sub> H <sub>36</sub> NO <sub>6</sub><br>(-0.5) | 428.2430;<br>327.1975;<br>299.2016;<br>281.1905;<br>120.0666 |
| Stereoisomer of<br>wakodecaline B | 6.93 | 446.2539<br>[M+H] <sup>+</sup> |  | C <sub>25</sub> H <sub>36</sub> NO <sub>6</sub><br>(-0.4) | 428.2425;<br>327.1961;<br>299.2015;<br>281.1916;<br>120.0666 |

**Table S2.** Experimental  $^{13}\text{C}$  and  $^1\text{H}$  NMR chemical shifts of pyrenosetins E (**5**) and Boltzmann-averaged  $^{13}\text{C}$  and  $^1\text{H}$  NMR isotropic shielding values of its four possible stereoisomers at C-3' and C-5' calculated at the mPW1PW91/6-311+G(d,p)/PCM( $\text{CHCl}_3$ ) level of theory.

| Experimental chemical shifts |               | Predicted isotropic shielding values |         |         |         |
|------------------------------|---------------|--------------------------------------|---------|---------|---------|
|                              | pyrenosetin E | 3'R,5'R                              | 3'S,5'R | 3'R,5'S | 3'S,5'S |
| C-1                          | 209.6         | -35.4                                | -39.8   | -41.1   | -34.8   |
| C-2                          | 54.3          | 126.8                                | 125.9   | 126.5   | 126.2   |
| C-3                          | 53.4          | 131.2                                | 130.1   | 131.2   | 129.9   |
| C-4                          | 132.1         | 44.7                                 | 45.2    | 45.1    | 44.9    |
| C-5                          | 127.8         | 51.8                                 | 51.5    | 51.5    | 51.8    |
| C-6                          | 37.6          | 145.4                                | 145.4   | 145.3   | 145.7   |
| C-7                          | 42.0          | 143.5                                | 143.6   | 143.5   | 143.6   |
| C-8                          | 33.0          | 151.08                               | 151.06  | 151.23  | 151.01  |
| C-9                          | 35.4          | 150.20                               | 150.35  | 150.22  | 150.29  |
| C-10                         | 25.3          | 159.68                               | 159.57  | 159.72  | 159.81  |
| C-11                         | 37.8          | 146.20                               | 147.18  | 145.92  | 147.03  |
| C-12                         | 15.4          | 170.91                               | 171.20  | 171.09  | 171.00  |
| C-13                         | 49.4          | 129.91                               | 129.99  | 129.42  | 132.42  |
| C-14                         | 131.2         | 47.93                                | 50.69   | 49.96   | 45.76   |
| C-15                         | 136.8         | 41.31                                | 40.63   | 40.63   | 42.92   |
| C-16                         | 69.0          | 113.85                               | 114.21  | 114.00  | 113.65  |
| C-17                         | 22.8          | 164.54                               | 163.64  | 164.60  | 164.50  |
| C-18                         | 23.9          | 161.27                               | 161.09  | 161.01  | 161.35  |
| C-19                         | 22.4          | 164.68                               | 164.78  | 164.79  | 164.66  |
| C-2'                         | 169.1         | 12.59                                | 12.55   | 13.33   | 11.83   |
| C-3'                         | 74.4          | 106.55                               | 107.17  | 107.46  | 105.62  |
| C-4'                         | 204.8         | -33.10                               | -36.12  | -35.34  | -32.83  |
| C-5'                         | 68.8          | 113.91                               | 114.00  | 113.08  | 114.59  |
| C-6'                         | 57.9          | 123.91                               | 123.31  | 122.85  | 125.38  |
| C-7'                         | 28.0          | 159.19                               | 159.10  | 159.36  | 159.11  |
| H-3                          | 2.57          | 28.86                                | 29.12   | 28.80   | 29.16   |
| H-5                          | 5.22          | 26.14                                | 26.11   | 26.12   | 26.14   |
| H-6                          | 1.82          | 29.84                                | 29.88   | 29.85   | 29.86   |
| H-7a                         | 1.79          | 30.02                                | 30.02   | 30.00   | 30.03   |
| H-7b                         | 0.85          | 30.94                                | 30.91   | 30.95   | 30.89   |
| H-8                          | 1.42          | 30.30                                | 30.27   | 30.28   | 30.30   |
| H-9a                         | 1.72          | 30.13                                | 30.15   | 30.12   | 30.14   |
| H-9b                         | 0.97          | 30.83                                | 30.76   | 30.83   | 30.76   |
| H-10a                        | 1.43          | 30.40                                | 30.45   | 30.38   | 30.44   |
| H-10b                        | 1.05          | 30.71                                | 30.75   | 30.72   | 30.73   |
| H-11                         | 1.56          | 30.40                                | 30.14   | 30.41   | 30.13   |
| H-12                         | 0.98          | 30.82                                | 30.85   | 30.82   | 30.85   |
| H-13                         | 3.42          | 28.40                                | 28.26   | 28.43   | 28.21   |
| H-14                         | 5.82          | 25.43                                | 25.67   | 25.47   | 25.53   |
| H-15                         | 5.55          | 25.99                                | 25.85   | 25.93   | 25.98   |
| H-16                         | 4.17          | 27.60                                | 27.57   | 27.55   | 27.64   |
| H-17                         | 1.18          | 30.64                                | 30.63   | 30.62   | 30.63   |
| H-18                         | 1.70          | 29.99                                | 29.99   | 29.99   | 29.99   |
| H-19                         | 0.89          | 30.86                                | 30.85   | 30.86   | 30.86   |
| H-5'                         | 3.85          | 27.86                                | 28.25   | 28.20   | 27.98   |
| H-6'a                        | 4.10          | 27.84                                | 27.70   | 27.61   | 27.62   |
| H-6'b                        | 3.87          | 27.88                                | 27.85   | 27.83   | 27.96   |
| H-7'                         | 3.09          | 28.72                                | 28.70   | 28.68   | 28.69   |



**Table S3.** Experimental  $^{13}\text{C}$  and  $^1\text{H}$  NMR chemical shifts of pyrenosetins F (**6**) and C (**3**) and Boltzmann-averaged  $^{13}\text{C}$  and  $^1\text{H}$  NMR isotropic shielding values of their four possible stereoisomers at C-3' and C-5' calculated at the mPW1PW91/6-311+G(d,p)/PCM( $\text{CHCl}_3$ ) level of theory.

|       | Experimental chemical shifts |                            | Predicted isotropic shielding values |         |         |         |
|-------|------------------------------|----------------------------|--------------------------------------|---------|---------|---------|
|       | pyrenosetin F ( <b>6</b> )   | pyrenosetin C ( <b>3</b> ) | 3'R,5'R                              | 3'S,5'R | 3'R,5'S | 3'S,5'S |
| C-1   | 208.5                        | 212.1                      | -33.7                                | -36.8   | -38.3   | -32.8   |
| C-2   | 54.1                         | 54.7                       | 127.0                                | 126.5   | 126.6   | 127.0   |
| C-3   | 52.9                         | 53.6                       | 130.9                                | 130.3   | 131.0   | 130.5   |
| C-4   | 131.5                        | 130.9                      | 45.5                                 | 45.9    | 45.8    | 45.8    |
| C-5   | 128.4                        | 128.8                      | 50.9                                 | 50.5    | 50.6    | 50.6    |
| C-6   | 37.7                         | 37.6                       | 145.3                                | 145.4   | 145.3   | 145.3   |
| C-7   | 41.9                         | 41.8                       | 143.6                                | 143.7   | 143.6   | 143.6   |
| C-8   | 32.9                         | 32.9                       | 151.10                               | 151.01  | 151.14  | 151.01  |
| C-9   | 35.3                         | 35.2                       | 150.21                               | 150.32  | 150.25  | 150.28  |
| C-10  | 25.3                         | 25.2                       | 159.75                               | 159.76  | 159.81  | 159.83  |
| C-11  | 38.0                         | 37.4                       | 146.03                               | 146.62  | 146.07  | 146.23  |
| C-12  | 15.3                         | 15.2                       | 170.69                               | 170.83  | 170.97  | 170.52  |
| C-13  | 50.0                         | 50.6                       | 131.64                               | 131.14  | 130.08  | 132.09  |
| C-14  | 146.1                        | 144.4                      | 29.39                                | 31.43   | 30.22   | 30.69   |
| C-15  | 134.1                        | 133.9                      | 48.38                                | 49.83   | 48.74   | 49.90   |
| C-16  | 198.8                        | 197.6                      | -19.67                               | -18.92  | -19.57  | -19.10  |
| C-17  | 26.8                         | 27.6                       | 158.04                               | 156.62  | 157.83  | 156.69  |
| C-18  | 23.8                         | 23.7                       | 161.48                               | 161.52  | 161.50  | 161.55  |
| C-19  | 22.4                         | 22.4                       | 164.71                               | 164.75  | 164.73  | 164.70  |
| C-2'  | 167.7                        | 167.8                      | 13.15                                | 13.13   | 13.74   | 12.93   |
| C-3'  | 73.7                         | 72.7                       | 106.62                               | 107.09  | 107.71  | 106.02  |
| C-4'  | 204.1                        | 206.4                      | -30.69                               | -31.12  | -32.47  | -29.64  |
| C-5'  | 69.1                         | 69.8                       | 113.45                               | 112.50  | 112.30  | 114.68  |
| C-6'  | 58.4                         | 60.3                       | 125.43                               | 120.97  | 122.07  | 122.89  |
| C-7'  | 27.8                         | 28.5                       | 159.43                               | 157.50  | 158.40  | 158.10  |
| H-3   | 2.82                         | 2.66                       | 28.81                                | 28.96   | 28.72   | 28.94   |
| H-5   | 5.26                         | 5.28                       | 26.08                                | 26.09   | 26.08   | 26.08   |
| H-6   | 1.85                         | 1.83                       | 29.83                                | 29.84   | 29.81   | 29.83   |
| H-7a  | 1.82                         | 1.82                       | 30.01                                | 30.01   | 30.00   | 30.01   |
| H-7b  | 0.86                         | 0.88                       | 30.92                                | 30.91   | 30.93   | 30.91   |
| H-8   | 1.45                         | 1.44                       | 30.28                                | 30.28   | 30.28   | 30.29   |
| H-9a  | 1.74                         | 1.73                       | 30.13                                | 30.12   | 30.11   | 30.12   |
| H-9b  | 0.92                         | 0.99                       | 30.85                                | 30.77   | 30.83   | 30.78   |
| H-10a | 1.37                         | 1.41                       | 30.44                                | 30.39   | 30.41   | 30.36   |
| H-10b | 1.00                         | 1.04                       | 30.68                                | 30.72   | 30.69   | 30.69   |
| H-11  | 1.41                         | 1.64                       | 30.44                                | 30.24   | 30.39   | 30.31   |
| H-12  | 1.02                         | 1.01                       | 30.77                                | 30.82   | 30.78   | 30.80   |
| H-13  | 3.40                         | 3.57                       | 28.26                                | 28.20   | 28.32   | 28.20   |
| H-14  | 7.09                         | 6.85                       | 24.11                                | 24.34   | 24.17   | 24.28   |
| H-15  | 6.02                         | 6.18                       | 25.53                                | 25.35   | 25.52   | 25.36   |
| H-17  | 2.22                         | 2.22                       | 29.52                                | 29.54   | 29.51   | 29.54   |
| H-18  | 1.69                         | 1.68                       | 30.03                                | 30.05   | 30.04   | 30.05   |
| H-19  | 0.91                         | 0.90                       | 30.86                                | 30.85   | 30.85   | 30.85   |
| H-5'  | 4.00                         | 3.61                       | 27.80                                | 28.13   | 28.12   | 27.74   |
| H-6'a | 4.03                         | 4.10                       | 27.71                                | 27.59   | 27.59   | 27.96   |
| H-6'b | 3.84                         | 3.94                       | 27.92                                | 27.85   | 27.84   | 27.85   |
| H-7'  | 3.06                         | 3.11                       | 28.72                                | 28.66   | 28.66   | 28.67   |

**Table S4.** Theoretical relative Gibbs free energies (kcal/mol) calculated at the B3LYP/TZVP/SMD(CHCl<sub>3</sub>)/B3LYP/6-31+G(d,p)/SMD(CHCl<sub>3</sub>) level, and populations according to the Boltzmann distribution (300 K) of populated (>1%) conformers of the four stereoisomers of pyrenosetins E (**5**) considered in this study.

|    | 3'R,5'R    |        | 3'S,5'R    |        | 3'R,5'S    |        | 3'S,5'S ( <b>5</b> ) |        |
|----|------------|--------|------------|--------|------------|--------|----------------------|--------|
|    | $\Delta G$ | % pop. | $\Delta G$ | % pop. | $\Delta G$ | % pop. | $\Delta G$           | % pop. |
| 1  | 0.00       | 17.1%  | 0.00       | 16.1%  | 0.00       | 37.5%  | 0.00                 | 20.7%  |
| 2  | 0.04       | 16.1%  | 0.06       | 14.5%  | 0.75       | 10.5%  | 0.10                 | 17.4%  |
| 3  | 0.14       | 13.4%  | 0.21       | 11.2%  | 0.78       | 10.1%  | 0.13                 | 16.5%  |
| 4  | 0.27       | 10.9%  | 0.36       | 8.7%   | 0.88       | 8.4%   | 0.23                 | 14.1%  |
| 5  | 0.57       | 6.5%   | 0.39       | 8.3%   | 1.06       | 6.3%   | 0.28                 | 13.0%  |
| 6  | 0.59       | 6.3%   | 0.39       | 8.3%   | 1.12       | 5.7%   | 0.68                 | 6.6%   |
| 7  | 0.72       | 5.1%   | 0.44       | 7.6%   | 1.20       | 4.9%   | 0.82                 | 5.1%   |
| 8  | 0.73       | 5.0%   | 0.79       | 4.2%   | 1.29       | 4.2%   | 1.38                 | 2.0%   |
| 9  | 0.81       | 4.4%   | 0.91       | 3.5%   | 1.42       | 3.4%   | 1.51                 | 1.6%   |
| 10 | 0.82       | 4.3%   | 0.91       | 3.5%   | 1.44       | 3.3%   | 1.77                 | 1.0%   |
| 11 | 1.00       | 3.2%   | 0.95       | 3.2%   | 1.76       | 1.9%   |                      |        |
| 12 | 1.07       | 2.8%   | 1.08       | 2.6%   | 1.79       | 1.8%   |                      |        |
| 13 | 1.10       | 2.7%   | 1.19       | 2.2%   | 2.07       | 1.1%   |                      |        |
| 14 | 1.24       | 2.1%   | 1.24       | 2.0%   |            |        |                      |        |
| 15 |            |        | 1.62       | 1.0%   |            |        |                      |        |
| 16 |            |        | 1.63       | 1.0%   |            |        |                      |        |
| 17 |            |        | 1.65       | 1.0%   |            |        |                      |        |

**Table S5.** Theoretical relative Gibbs free energies (kcal/mol) calculated at the B3LYP/TZVP/SMD(CHCl<sub>3</sub>)/B3LYP/6-31+G(d,p)/SMD(CHCl<sub>3</sub>) level, and populations according to the Boltzmann distribution (300 K) of populated (>1%) conformers of the four stereoisomers of pyrenosetins F (**6**) considered in this study.

|    | 3'R,5'R ( <b>6</b> ) |        | 3'S,5'R ( <b>3</b> ) |        | 3'R,5'S    |        | 3'S,5'S ( <b>5</b> ) |        |
|----|----------------------|--------|----------------------|--------|------------|--------|----------------------|--------|
|    | $\Delta G$           | % pop. | $\Delta G$           | % pop. | $\Delta G$ | % pop. | $\Delta G$           | % pop. |
| 1  | 0.00                 | 28.1%  | 0.00                 | 20.1%  | 0.00       | 27.7%  | 0.00                 | 14.9%  |
| 2  | 0.16                 | 21.3%  | 0.09                 | 17.1%  | 0.33       | 15.9%  | 0.05                 | 13.7%  |
| 3  | 0.60                 | 10.2%  | 0.26                 | 12.9%  | 0.68       | 8.7%   | 0.06                 | 13.5%  |
| 4  | 0.70                 | 8.5%   | 0.32                 | 11.6%  | 0.69       | 8.7%   | 0.06                 | 13.4%  |
| 5  | 0.72                 | 8.4%   | 0.37                 | 10.8%  | 0.72       | 8.2%   | 0.09                 | 12.7%  |
| 6  | 0.83                 | 6.9%   | 0.50                 | 8.6%   | 0.83       | 6.8%   | 0.50                 | 6.4%   |
| 7  | 0.92                 | 5.9%   | 0.69                 | 6.3%   | 0.91       | 5.9%   | 0.55                 | 5.9%   |
| 8  | 1.08                 | 4.6%   | 0.72                 | 6.0%   | 0.91       | 5.9%   | 0.61                 | 5.3%   |
| 9  | 1.22                 | 3.6%   | 0.81                 | 5.1%   | 1.07       | 4.5%   | 0.64                 | 5.0%   |
| 10 | 1.40                 | 2.6%   | 0.82                 | 5.1%   | 1.12       | 4.2%   | 0.70                 | 4.6%   |
| 11 |                      |        | 0.95                 | 4.1%   | 1.24       | 3.4%   | 0.70                 | 4.5%   |
| 12 |                      |        | 0.97                 | 3.9%   |            |        | 0.73                 | 4.4%   |
| 13 |                      |        |                      |        |            |        | 0.77                 | 4.0%   |
| 14 |                      |        |                      |        |            |        | 1.63                 | 1.0%   |

**Table S6.** Cartesian coordinates of the six lowest-energy conformers of the 3'R,5'R stereoisomer of pyrenosetins E at the B3LYP/TZVP/SMD(CHCl<sub>3</sub>)/B3LYP/6-31+G(d,p)/SMD(CHCl<sub>3</sub>) level.

| Conformer 1 |         |         | Conformer 2 |   |         | Conformer 3 |         |   |         |         |         |
|-------------|---------|---------|-------------|---|---------|-------------|---------|---|---------|---------|---------|
| C           | -0.3990 | -1.4319 | 0.9830      | C | -0.5355 | -1.5204     | 0.8922  | C | -0.5353 | -1.5979 | 0.7804  |
| C           | -1.4794 | -0.4124 | 1.3263      | C | -1.5391 | -0.4461     | 1.3023  | C | -1.5353 | -0.5471 | 1.2575  |
| C           | -0.7108 | 0.9401  | 1.3131      | C | -0.6724 | 0.8438      | 1.3732  | C | -0.6647 | 0.7348  | 1.4076  |
| C           | -1.6017 | 2.1548  | 1.1349      | C | -1.4632 | 2.1327      | 1.2569  | C | -1.4522 | 2.0301  | 1.3737  |
| C           | -2.8655 | 2.0353  | 0.7026      | C | -2.7310 | 2.1367      | 0.8204  | C | -2.7210 | 2.0647  | 0.9415  |
| C           | -3.5422 | 0.7385  | 0.3487      | C | -3.5059 | 0.9168      | 0.3995  | C | -3.5004 | 0.8759  | 0.4472  |
| C           | -4.4352 | 0.8555  | -0.9042     | C | -4.3868 | 1.1731      | -0.8411 | C | -4.3829 | 1.2121  | -0.7733 |
| C           | -5.1963 | -0.4506 | -1.1946     | C | -5.2450 | -0.0518     | -1.2045 | C | -5.2466 | 0.0154  | -1.2104 |
| C           | -4.2182 | -1.6366 | -1.2765     | C | -4.3597 | -1.3019     | -1.3586 | C | -4.3669 | -1.2264 | -1.4428 |
| C           | -3.3016 | -1.7382 | -0.0458     | C | -3.4547 | -1.5439     | -0.1392 | C | -3.4607 | -1.5469 | -0.2426 |
| C           | -2.5400 | -0.4187 | 0.1675      | C | -2.5945 | -0.3013     | 0.1484  | C | -2.5945 | -0.3278 | 0.1187  |
| C           | -2.0835 | -0.7401 | 2.7003      | C | -2.1694 | -0.8136     | 2.6543  | C | -2.1629 | -0.9972 | 2.5860  |
| C           | 0.4095  | 0.7731  | 0.2274      | C | 0.4406  | 0.6615      | 0.2871  | C | 0.4428  | 0.6116  | 0.3079  |
| C           | 1.5641  | 1.7357  | 0.3211      | C | 1.6802  | 1.4999      | 0.4477  | C | 1.6812  | 1.4479  | 0.4828  |
| C           | 2.0768  | 2.4064  | -0.7166     | C | 2.3222  | 2.0969      | -0.5613 | C | 2.2651  | 2.1411  | -0.5001 |
| C           | 3.2654  | 3.3293  | -0.6295     | C | 3.6690  | 2.7569      | -0.4241 | C | 3.6046  | 2.8208  | -0.3805 |
| C           | 2.9682  | 4.7202  | -1.1797     | C | 3.7187  | 4.1573      | -1.0241 | C | 3.5700  | 4.2853  | -0.8027 |
| C           | -1.0251 | 3.4931  | 1.5241      | C | -0.7755 | 3.4000      | 1.6995  | C | -0.7620 | 3.2640  | 1.8989  |
| C           | -6.0551 | -0.3360 | -2.4582     | C | -6.0912 | 0.2015      | -2.4563 | C | -6.0932 | 0.3491  | -2.4430 |
| C           | 2.0237  | -1.0098 | 1.2943      | C | 1.9190  | -1.2834     | 1.2397  | C | 1.9018  | -1.3558 | 1.2275  |
| C           | 0.8388  | -0.7141 | 0.3632      | C | 0.7564  | -0.8635     | 0.3267  | C | 0.7700  | -0.9103 | 0.2870  |
| C           | 1.2421  | -1.3928 | -0.9343     | C | 1.1350  | -1.4684     | -1.0162 | C | 1.2178  | -1.4409 | -1.0638 |
| C           | 2.4688  | -2.2679 | -0.6796     | C | 2.3560  | -2.3755     | -0.8334 | C | 2.4457  | -2.3332 | -0.8775 |
| C           | 3.5360  | -2.0554 | -1.7673     | C | 3.4371  | -2.0974     | -1.8753 | C | 3.5646  | -1.9785 | -1.8694 |
| C           | 3.9849  | -2.5008 | 1.3676      | C | 3.8953  | -2.7582     | 1.1583  | C | 3.8973  | -2.8013 | 1.1637  |
| H           | -0.1930 | 1.0334  | 2.2778      | H | -0.1595 | 0.8424      | 2.3450  | H | -0.1487 | 0.6716  | 2.3752  |
| H           | -3.4812 | 2.9325  | 0.6290      | H | -3.2720 | 3.0833      | 0.7888  | H | -3.2600 | 3.0124  | 0.9727  |
| H           | -4.2153 | 0.4769  | 1.1830      | H | -4.1970 | 0.6602      | 1.2206  | H | -4.1907 | 0.5711  | 1.2523  |
| H           | -5.1479 | 1.6800  | -0.7703     | H | -5.0346 | 2.0405      | -0.6572 | H | -5.0268 | 2.0688  | -0.5343 |
| H           | -3.8110 | 1.1188  | -1.7707     | H | -3.7436 | 1.4381      | -1.6931 | H | -3.7402 | 1.5272  | -1.6085 |
| H           | -5.8686 | -0.6343 | -0.3420     | H | -5.9303 | -0.2333     | -0.3617 | H | -5.9315 | -0.2149 | -0.3795 |
| H           | -4.7789 | -2.5718 | -1.4000     | H | -4.9896 | -2.1831     | -1.5343 | H | -5.0008 | -2.0925 | -1.6714 |
| H           | -3.5984 | -1.5251 | -2.1784     | H | -3.7323 | -1.1854     | -2.2546 | H | -3.7407 | -1.0575 | -2.3314 |
| H           | -2.6046 | -2.5727 | -0.1712     | H | -2.8230 | -2.4202     | -0.3151 | H | -2.8334 | -2.4136 | -0.4731 |
| H           | -3.9077 | -1.9665 | 0.8404      | H | -4.0773 | -1.7766     | 0.7343  | H | -4.0826 | -1.8297 | 0.6166  |
| H           | -1.9905 | -0.2176 | -0.7636     | H | -2.0290 | -0.0888     | -0.7705 | H | -2.0318 | -0.0607 | -0.7878 |
| H           | -0.0449 | 0.8696  | -0.7645     | H | 0.0070  | 0.8571      | -0.6997 | H | -0.0013 | 0.8425  | -0.6666 |
| H           | 2.0144  | 1.8511  | 1.3065      | H | 2.1110  | 1.5342      | 1.4476  | H | 2.1606  | 1.4012  | 1.4601  |
| H           | 1.6464  | 2.2876  | -1.7124     | H | 1.9203  | 2.0459      | -1.5744 | H | 1.8040  | 2.1835  | -1.4889 |
| H           | 3.5739  | 3.4163  | 0.4240      | H | 3.9258  | 2.8153      | 0.6459  | H | 3.9429  | 2.7561  | 0.6659  |
| H           | 2.1526  | -3.3235 | -0.6952     | H | 2.0367  | -3.4226     | -0.9544 | H | 2.1563  | -3.3810 | -1.0577 |
| H           | 3.0426  | -2.1632 | -2.7420     | H | 4.2755  | -2.7946     | -1.7404 | H | 4.4611  | -2.5575 | -1.6303 |
| H           | 3.9259  | -1.0350 | -1.6966     | H | 2.9930  | -2.2887     | -2.8592 | H | 3.2331  | -2.2761 | -2.8706 |
| H           | 4.3554  | -3.8208 | -1.8552     | H | 4.2420  | -0.4671     | -2.6021 | H | 3.3161  | -0.1095 | -2.3952 |
| H           | -2.8388 | -0.0015 | 2.9817      | H | -2.8667 | -0.0390     | 2.9846  | H | -2.8582 | -0.2435 | 2.9652  |
| H           | -2.5447 | -1.7305 | 2.7068      | H | -2.7048 | -1.7644     | 2.5992  | H | -2.7004 | -1.9416 | 2.4725  |
| H           | -1.3041 | -0.7314 | 3.4690      | H | -1.3929 | -0.9130     | 3.4197  | H | -1.3847 | -1.1451 | 3.3415  |
| H           | 2.6412  | 4.6581  | -2.2232     | H | 3.4351  | 4.1329      | -2.0819 | H | 3.2122  | 4.3798  | -1.8338 |
| H           | 3.8690  | 5.3407  | -1.1388     | H | 4.7328  | 4.5635      | -0.9508 | H | 4.5746  | 4.7168  | -0.7482 |
| H           | 2.1815  | 5.2089  | -0.5972     | H | 3.0362  | 4.8300      | -0.4953 | H | 2.9073  | 4.8617  | -0.1498 |
| H           | -1.7648 | 4.2918  | 1.4135      | H | -1.4462 | 4.2617      | 1.6287  | H | -1.4293 | 4.1309  | 1.8804  |
| H           | -0.6855 | 3.4858  | 2.5684      | H | -0.4325 | 3.3196      | 2.7396  | H | -0.4245 | 3.1156  | 2.9334  |
| H           | -0.1518 | 3.7522  | 0.9156      | H | 0.1140  | 3.6114      | 1.0951  | H | 0.1313  | 3.5101  | 1.3137  |
| H           | -5.4331 | -0.1504 | -3.3428     | H | -5.4560 | 0.3910      | -3.3305 | H | -5.4583 | 0.5891  | -3.3050 |
| H           | -6.7743 | 0.4875  | -2.3801     | H | -6.7459 | 1.0713      | -2.3276 | H | -6.7437 | 1.2122  | -2.2600 |
| H           | -6.6219 | -1.2566 | -2.6395     | H | -6.7262 | -0.6612     | -2.6894 | H | -6.7324 | -0.4948 | -2.7276 |
| H           | 3.8630  | -3.5897 | 1.3753      | H | 3.8339  | -3.8448     | 1.0331  | H | 3.8554  | -3.8779 | 0.9649  |
| H           | 4.9353  | -2.2618 | 0.8863      | H | 4.8302  | -2.4004     | 0.7146  | H | 4.8532  | -2.4098 | 0.8010  |
| H           | 3.9861  | -2.1298 | 2.3927      | H | 3.8913  | -2.5166     | 2.2213  | H | 3.8288  | -2.6289 | 2.2380  |
| H           | 4.5753  | 1.9423  | -1.0556     | H | 4.4931  | 1.0437      | -0.8908 | H | 4.5314  | 1.2189  | -1.0413 |
| N           | 2.8696  | -1.8769 | 0.6697      | N | 2.7471  | -2.1132     | 0.5465  | N | 2.7778  | -2.1282 | 0.5280  |
| O           | -0.4430 | -2.6298 | 1.1691      | O | -0.6743 | -2.7212     | 0.9985  | O | -0.6841 | -2.8017 | 0.7942  |
| O           | 4.3536  | 2.8131  | -1.4169     | O | 4.6548  | 1.9739      | -1.1196 | O | 4.5493  | 2.1689  | -1.2449 |
| O           | 0.7043  | -1.2533 | -2.0124     | O | 0.5786  | -1.2690     | -2.0736 | O | 0.7261  | -1.1679 | -2.1388 |
| O           | 2.1549  | -0.5656 | 2.4309      | O | 2.0531  | -0.9480     | 2.4126  | O | 1.9776  | -1.0798 | 2.4210  |
| O           | 4.6505  | -2.9237 | -1.6389     | O | 3.8650  | -0.7434     | -1.7548 | O | 3.9327  | -0.6035 | -1.8358 |

Table S6 (continued)

| Conformer 4 |         |         |         | Conformer 5 |         |         | Conformer 6 |   |         |         |         |
|-------------|---------|---------|---------|-------------|---------|---------|-------------|---|---------|---------|---------|
| C           | 0.4042  | -1.3938 | -1.0796 | C           | 0.4651  | -1.4788 | -0.9711     | C | 0.5702  | -1.3986 | -1.0804 |
| C           | 1.4417  | -0.3170 | -1.3759 | C           | 1.4972  | -0.4121 | -1.3284     | C | 1.5713  | -0.2842 | -1.3716 |
| C           | 0.6163  | 1.0006  | -1.3205 | C           | 0.6621  | 0.9012  | -1.3573     | C | 0.6962  | 0.9993  | -1.3190 |
| C           | 1.4546  | 2.2444  | -1.0942 | C           | 1.4842  | 2.1641  | -1.1871     | C | 1.4737  | 2.2760  | -1.0629 |
| C           | 2.7196  | 2.1623  | -0.6569 | C           | 2.7481  | 2.1197  | -0.7414     | C | 2.7377  | 2.2452  | -0.6168 |
| C           | 3.4476  | 0.8834  | -0.3423 | C           | 3.4892  | 0.8665  | -0.3600     | C | 3.5185  | 0.9938  | -0.3158 |
| C           | 4.3262  | 0.9938  | 0.9214  | C           | 4.3658  | 1.0546  | 0.8959      | C | 4.3854  | 1.1291  | 0.9536  |
| C           | 5.1399  | -0.2884 | 1.1726  | C           | 5.1917  | -0.2036 | 1.2181      | C | 5.2475  | -0.1218 | 1.2014  |
| C           | 4.2128  | -1.5170 | 1.2043  | C           | 4.2755  | -1.4366 | 1.3184      | C | 4.3688  | -1.3857 | 1.2207  |
| C           | 3.3092  | -1.6136 | -0.0364 | C           | 3.3748  | -1.6109 | 0.0843      | C | 3.4776  | -1.5096 | -0.0262 |
| C           | 2.4939  | -0.3205 | -0.2092 | C           | 2.5468  | -0.3379 | -0.1624     | C | 2.6132  | -0.2488 | -0.1976 |
| C           | 2.0689  | -0.5693 | -2.7555 | C           | 2.1298  | -0.7422 | -2.6895     | C | 2.2176  | -0.5087 | -2.7464 |
| C           | -0.5004 | 0.7475  | -0.2482 | C           | -0.4635 | 0.6972  | -0.2874     | C | -0.4250 | 0.7114  | -0.2669 |
| C           | -1.6924 | 1.6659  | -0.3068 | C           | -1.6707 | 1.5909  | -0.3841     | C | -1.6912 | 1.5142  | -0.4160 |
| C           | -2.2220 | 2.2848  | 0.7545  | C           | -2.2354 | 2.1966  | 0.6646      | C | -2.4645 | 1.8836  | 0.6075  |
| C           | -3.4456 | 3.1635  | 0.7053  | C           | -3.5001 | 3.0084  | 0.6017      | C | -3.8498 | 2.4438  | 0.4378  |
| C           | -3.1882 | 4.5586  | 1.2651  | C           | -3.2963 | 4.4416  | 1.0982      | C | -4.1702 | 3.5581  | 1.4289  |
| C           | 0.8250  | 3.5698  | -1.4427 | C           | 0.8367  | 3.4631  | -1.5970     | C | 0.7713  | 3.5755  | -1.3669 |
| C           | 5.9838  | -0.1825 | 2.4469  | C           | 6.0340  | -0.0185 | 2.4844      | C | 6.0796  | 0.0092  | 2.4812  |
| C           | -2.0310 | -1.0595 | -1.4037 | C           | -1.9548 | -1.1383 | -1.4241     | C | -1.9184 | -1.1680 | -1.2825 |
| C           | -0.8697 | -0.7480 | -0.4449 | C           | -0.8314 | -0.8076 | -0.4265     | C | -0.7049 | -0.8215 | -0.4100 |
| C           | -1.2636 | -1.4941 | 0.8134  | C           | -1.3105 | -1.4622 | 0.8550      | C | -1.0056 | -1.5316 | 0.9073  |
| C           | -2.4111 | -2.4448 | 0.4966  | C           | -2.5478 | -2.3027 | 0.5684      | C | -2.3143 | -2.3131 | 0.7740  |
| C           | -3.5071 | -2.3610 | 1.5811  | C           | -3.6781 | -1.9581 | 1.5668      | C | -3.2931 | -2.0206 | 1.9265  |
| C           | -3.8988 | -2.6650 | -1.5625 | C           | -3.9408 | -2.5972 | -1.5462     | C | -3.9761 | -2.5152 | -1.1466 |
| H           | 0.1000  | 1.1061  | -2.2847 | H           | 0.1573  | 0.9491  | -2.3318     | H | 0.1924  | 1.0927  | -2.2917 |
| H           | 3.2971  | 3.0811  | -0.5485 | H           | 3.3134  | 3.0501  | -0.6745     | H | 3.2685  | 3.1880  | -0.4782 |
| H           | 4.1370  | 0.6793  | -1.1793 | H           | 4.1809  | 0.6244  | -1.1848     | H | 4.2191  | 0.8261  | -1.1516 |
| H           | 5.0042  | 1.8517  | 0.8220  | H           | 5.0354  | 1.9124  | 0.7495      | H | 5.0296  | 2.0139  | 0.8647  |
| H           | 3.6854  | 1.2004  | 1.7912  | H           | 3.7224  | 1.3025  | 1.7528      | H | 3.7319  | 1.3034  | 1.8208  |
| H           | 5.8257  | -0.4130 | 0.3200  | H           | 5.8788  | -0.3695 | 0.3737      | H | 5.9423  | -0.2142 | 0.3519  |
| H           | 4.8119  | -2.4314 | 1.2989  | H           | 4.8825  | -2.3390 | 1.4649      | H | 5.0026  | -2.2766 | 1.3143  |
| H           | 3.5830  | -1.4645 | 2.1047  | H           | 3.6441  | -1.3391 | 2.2139      | H | 3.7313  | -1.3628 | 2.1168  |
| H           | 2.6478  | -2.4810 | 0.0539  | H           | 2.7216  | -2.4780 | 0.2218      | H | 2.8487  | -2.4017 | 0.0555  |
| H           | 3.9302  | -1.7844 | -0.9253 | H           | 3.9991  | -1.8248 | -0.7928     | H | 4.1103  | -1.6517 | -0.9120 |
| H           | 1.9311  | -0.1751 | 0.7244  | H           | 1.9806  | -0.1459 | 0.7608      | H | 2.0371  | -0.1335 | 0.7320  |
| H           | -0.0535 | 0.8223  | 0.7489  | H           | -0.0253 | 0.8117  | 0.7100      | H | -0.0189 | 0.8602  | 0.7393  |
| H           | -2.1544 | 1.7928  | -1.2852 | H           | -2.1306 | 1.6796  | -1.3677     | H | -2.0351 | 1.6881  | -1.4344 |
| H           | -1.7777 | 2.1546  | 1.7428  | H           | -1.7937 | 2.0970  | 1.6572      | H | -2.1569 | 1.6761  | 1.6315  |
| H           | -3.7817 | 3.2507  | -0.3397 | H           | -3.8563 | 3.0352  | -0.4399     | H | -3.9695 | 2.8160  | -0.5896 |
| H           | -2.0304 | -3.4769 | 0.4711  | H           | -2.3032 | -3.3689 | 0.6830      | H | -2.0827 | -3.3902 | 0.8037  |
| H           | -3.8428 | -1.3162 | 1.6752  | H           | -3.8788 | -0.8768 | 1.5321      | H | -4.2431 | -2.5376 | 1.7246  |
| H           | -4.3692 | -2.9634 | 1.2805  | H           | -4.5940 | -2.4790 | 1.2727      | H | -2.8628 | -2.4757 | 2.8244  |
| H           | -2.2500 | -2.3744 | 3.0452  | H           | -2.5118 | -1.9732 | 3.1065      | H | -3.9872 | -0.1991 | 1.5167  |
| H           | 2.7944  | 0.2101  | -3.0029 | H           | 2.8476  | 0.0282  | -2.9837     | H | 2.9189  | 0.2948  | -2.9872 |
| H           | 2.5713  | -1.5387 | -2.7935 | H           | 2.6427  | -1.7066 | -2.6670     | H | 2.7521  | -1.4608 | -2.7838 |
| H           | 1.2955  | -0.5648 | -3.5302 | H           | 1.3576  | -0.7936 | -3.4636     | H | 1.4502  | -0.5287 | -3.5270 |
| H           | -2.8317 | 4.4976  | 2.2990  | H           | -2.9244 | 4.4420  | 2.1284      | H | -4.0618 | 3.2007  | 2.4585  |
| H           | -4.1135 | 5.1434  | 1.2552  | H           | -4.2425 | 4.9959  | 1.0747      | H | -5.1957 | 3.9220  | 1.2932  |
| H           | -2.4372 | 5.0846  | 0.6683  | H           | -2.5791 | 4.9781  | 0.4684      | H | -3.4939 | 4.4067  | 1.2840  |
| H           | 1.5304  | 4.3942  | -1.3008 | H           | 1.5300  | 4.3032  | -1.4930     | H | 1.4281  | 4.4332  | -1.1930 |
| H           | 0.4914  | 3.5833  | -2.4889 | H           | 0.5034  | 3.4238  | -2.6426     | H | 0.4365  | 3.6087  | -2.4123 |
| H           | -0.0614 | 3.7723  | -0.8316 | H           | -0.0530 | 3.6811  | -0.9955     | H | -0.1255 | 3.7056  | -0.7494 |
| H           | 5.3481  | -0.0557 | 3.3320  | H           | 5.3967  | 0.1529  | 3.3609      | H | 5.4343  | 0.1046  | 3.3633  |
| H           | 6.6673  | 0.6735  | 2.4044  | H           | 6.7102  | 0.8394  | 2.3936      | H | 6.7288  | 0.8920  | 2.4483  |
| H           | 6.5885  | -1.0837 | 2.6003  | H           | 6.6462  | -0.9045 | 2.6888      | H | 6.7188  | -0.8683 | 2.6323  |
| H           | -3.7292 | -3.7470 | -1.5858 | H           | -3.8962 | -3.6860 | -1.4362     | H | -3.9535 | -3.6077 | -1.0644 |
| H           | -4.8745 | -2.4688 | -1.1071 | H           | -4.9111 | -2.2433 | -1.1837     | H | -4.8789 | -2.1410 | -0.6535 |
| H           | -3.8990 | -2.2770 | -2.5813 | H           | -3.8400 | -2.3349 | -2.5996     | H | -4.0052 | -2.2322 | -2.1991 |
| H           | -4.6796 | 1.7159  | 1.1574  | H           | -5.2541 | 2.8590  | 1.4624      | H | -5.6319 | 1.6600  | 0.8194  |
| N           | -2.8292 | -2.0051 | -0.8304 | N           | -2.8439 | -1.9763 | -0.8213     | N | -2.7788 | -1.9384 | -0.5595 |
| O           | 0.4975  | -2.5803 | -1.3100 | O           | 0.5831  | -2.6783 | -1.1034     | O | 0.7053  | -2.5764 | -1.3394 |
| O           | -4.4945 | 2.5980  | 1.5116  | O           | -4.4525 | 2.3157  | 1.4281      | O | -4.7472 | 1.3160  | 0.6238  |
| O           | -0.7869 | -1.3328 | 1.9221  | O           | -0.8316 | -1.2978 | 1.9622      | O | -0.3226 | -1.4905 | 1.9070  |
| O           | -2.1809 | -0.5668 | -2.5163 | O           | -2.0108 | -0.7397 | -2.5831     | O | -2.0751 | -0.8100 | -2.4459 |
| O           | -3.0394 | -2.8887 | 2.8065  | O           | -3.3479 | -2.4063 | 2.8674      | O | -3.4755 | -0.6531 | 2.2132  |

**Table S7.** Cartesian coordinates of the six lowest-energy conformers of the 3'S,5'R stereoisomer of pyrenosetins E at the B3LYP/TZVP/SMD(CHCl<sub>3</sub>)//B3LYP/6-31+G(d,p)/SMD(CHCl<sub>3</sub>) level.

| Conformer 1 |         |         |         | Conformer 2 |         |         |        | Conformer 3 |         |         |         |
|-------------|---------|---------|---------|-------------|---------|---------|--------|-------------|---------|---------|---------|
| C           | 0.2457  | -1.4916 | -0.7207 | C           | 0.2667  | -1.3352 | -      | C           | 0.2797  | -1.3251 | -0.9484 |
|             |         |         |         |             |         |         | 0.9379 |             |         |         |         |
| C           | 1.2931  | -0.5348 | -1.2756 | C           | 1.2761  | -0.2795 | -      | C           | 1.2865  | -0.2639 | -1.3546 |
|             |         |         |         |             |         |         | 1.3511 |             |         |         |         |
| C           | 0.5241  | 0.8135  | -1.3770 | C           | 0.4260  | 1.0240  | -      | C           | 0.4316  | 1.0368  | -1.3614 |
|             |         |         |         |             |         |         | 1.3638 |             |         |         |         |
| C           | 1.4239  | 2.0341  | -1.4305 | C           | 1.2501  | 2.2943  | -      | C           | 1.2501  | 2.3095  | -1.2529 |
|             |         |         |         |             |         |         | 1.2673 |             |         |         |         |
| C           | 2.7149  | 1.9626  | -1.0750 | C           | 2.5265  | 2.2659  | -      | C           | 2.5261  | 2.2837  | -0.8414 |
|             |         |         |         |             |         |         | 0.8570 |             |         |         |         |
| C           | 3.4178  | 0.7185  | -0.6035 | C           | 3.2842  | 1.0269  | -      | C           | 3.2882  | 1.0447  | -0.4541 |
|             |         |         |         |             |         |         | 0.4615 |             |         |         |         |
| C           | 4.3963  | 0.9884  | 0.5587  | C           | 4.1887  | 1.2455  | 0.7694 | C           | 4.1907  | 1.2589  | 0.7790  |
| C           | 5.1830  | -0.2744 | 0.9539  | C           | 5.0325  | -0.0011 | 1.0919 | C           | 5.0376  | 0.0130  | 1.0959  |
| C           | 4.2201  | -1.4387 | 1.2502  | C           | 4.1306  | -1.2407 | 1.2356 | C           | 4.1388  | -1.2297 | 1.2323  |
| C           | 3.2177  | -1.6884 | 0.1109  | C           | 3.1993  | -1.4436 | 0.0286 | C           | 3.2099  | -1.4289 | 0.0229  |
| C           | 2.4366  | -0.4015 | -0.2058 | C           | 2.3575  | -0.1794 | -      | C           | 2.3649  | -0.1659 | -0.2146 |
|             |         |         |         |             |         |         | 0.2138 |             |         |         |         |
| C           | 1.7964  | -1.0385 | -2.6363 | C           | 1.8729  | -0.6193 | -      | C           | 1.8869  | -0.5939 | -2.7284 |
|             |         |         |         |             |         |         | 2.7242 |             |         |         |         |
| C           | -0.4987 | 0.8019  | -0.1881 | C           | -0.6361 | 0.8424  | -      | C           | -0.6337 | 0.8460  | -0.2273 |
|             |         |         |         |             |         |         | 0.2243 |             |         |         |         |
| C           | -1.6595 | 1.7539  | -0.3107 | C           | -1.8629 | 1.7093  | -      | C           | -1.8716 | 1.6969  | -0.3397 |
|             |         |         |         |             |         |         | 0.3314 |             |         |         |         |
| C           | -2.0685 | 2.5762  | 0.6621  | C           | -2.3786 | 2.4149  | 0.6815 | C           | -2.4273 | 2.3520  | 0.6837  |
| C           | -3.2536 | 3.5009  | 0.5554  | C           | -3.6303 | 3.2489  | 0.5891 | C           | -3.6836 | 3.1748  | 0.5871  |
| C           | -2.8810 | 4.9600  | 0.7980  | C           | -3.3960 | 4.7034  | 0.9840 | C           | -3.4419 | 4.6387  | 0.9658  |
| C           | 0.8199  | 3.3118  | -1.9569 | C           | 0.5884  | 3.5769  | -      | C           | 0.5805  | 3.5932  | -1.6748 |
|             |         |         |         |             |         |         | 1.7049 |             |         |         |         |
| C           | 6.1274  | -0.0074 | 2.1304  | C           | 5.9037  | 0.2120  | 2.3339 | C           | 5.9070  | 0.2219  | 2.3400  |
| C           | -1.1724 | -1.1594 | 1.3664  | C           | -1.1498 | -1.2699 | 1.1817 | C           | -1.1278 | -1.2709 | 1.1766  |
| C           | -0.9266 | -0.6925 | -0.0730 | C           | -0.9458 | -0.6865 | -      | C           | -0.9325 | -0.6851 | -0.2319 |
|             |         |         |         |             |         |         | 0.2266 |             |         |         |         |
| C           | -2.2082 | -1.0967 | -0.7904 | C           | -2.1987 | -1.1535 | -      | C           | -2.1863 | -1.1569 | -0.9734 |
|             |         |         |         |             |         |         | 0.9719 |             |         |         |         |
| C           | -3.0933 | -1.8861 | 0.1663  | C           | -2.9613 | -2.1416 | -      | C           | -2.9479 | -2.1392 | -0.0853 |
|             |         |         |         |             |         |         | 0.0902 |             |         |         |         |
| C           | -3.3559 | -3.3039 | -0.3999 | C           | -2.9870 | -3.5811 | -      | C           | -2.9842 | -3.5765 | -0.6710 |
|             |         |         |         |             |         |         | 0.6740 |             |         |         |         |
| C           | -2.8877 | -2.3846 | 2.6549  | C           | -2.7063 | -2.7848 | 2.3547 | C           | -2.6830 | -2.7789 | 2.3588  |
| H           | -0.0694 | 0.7863  | -2.3023 | H           | -0.1288 | 1.0464  | -      | H           | -0.1197 | 1.0632  | -2.3125 |
|             |         |         |         |             |         |         | 2.3129 |             |         |         |         |
| H           | 3.3330  | 2.8567  | -1.1652 | H           | 3.0911  | 3.1988  | -      | H           | 3.0860  | 3.2192  | -0.8116 |
|             |         |         |         |             |         |         | 0.8374 |             |         |         |         |
| H           | 4.0320  | 0.3495  | -1.4427 | H           | 3.9584  | 0.7718  | -      | H           | 3.9641  | 0.7970  | -1.2905 |
|             |         |         |         |             |         |         | 1.2970 |             |         |         |         |
| H           | 5.0932  | 1.7874  | 0.2729  | H           | 4.8476  | 2.1056  | 0.5912 | H           | 4.8475  | 2.1219  | 0.6065  |
| H           | 3.8333  | 1.3594  | 1.4275  | H           | 3.5640  | 1.5031  | 1.6370 | H           | 3.5642  | 1.5098  | 1.6473  |
| H           | 5.7951  | -0.5634 | 0.0852  | H           | 5.7003  | -0.1749 | 0.2336 | H           | 5.7068  | -0.1545 | 0.2374  |
| H           | 4.7938  | -2.3532 | 1.4469  | H           | 4.7498  | -2.1349 | 1.3805 | H           | 4.7603  | -2.1229 | 1.3737  |
| H           | 3.6649  | -1.2160 | 2.1732  | H           | 3.5203  | -1.1347 | 2.1443 | H           | 3.5269  | -1.1298 | 2.1405  |
| H           | 2.5354  | -2.4973 | 0.3905  | H           | 2.5553  | -2.3116 | 0.2036 | H           | 2.5680  | -2.2994 | 0.1926  |
| H           | 3.7585  | -2.0271 | -0.7823 | H           | 3.8001  | -1.6711 | -      | H           | 3.8127  | -1.6504 | -0.8673 |
|             |         |         |         |             |         |         | 0.8614 |             |         |         |         |
| H           | 1.9572  | -0.0887 | 0.7323  | H           | 1.8163  | 0.0190  | 0.7215 | H           | 1.8206  | 0.0257  | 0.7202  |
| H           | 0.0372  | 1.0262  | 0.7396  | H           | -0.1539 | 1.0417  | 0.7378 | H           | -0.1583 | 1.0487  | 0.7374  |
| H           | -2.2003 | 1.7417  | -1.2574 | H           | -2.3587 | 1.7320  | -      | H           | -2.3473 | 1.7364  | -1.3191 |
|             |         |         |         |             |         |         | 1.3017 |             |         |         |         |
| H           | -1.5424 | 2.5966  | 1.6179  | H           | -1.8993 | 2.3955  | 1.6617 | H           | -1.9717 | 2.3086  | 1.6740  |
| H           | -3.6940 | 3.4040  | -0.4495 | H           | -4.0089 | 3.2126  | -      | H           | -4.0609 | 3.1295  | -0.4468 |
|             |         |         |         |             |         |         | 0.4446 |             |         |         |         |
| H           | -4.0651 | -1.3822 | 0.2704  | H           | -4.0018 | -1.7944 | -      | H           | -3.9847 | -1.7841 | 0.0006  |
|             |         |         |         |             |         |         | 0.0143 |             |         |         |         |
| H           | -2.3936 | -3.7874 | -0.6210 | H           | -3.7852 | -4.1443 | -      | H           | -3.7738 | -4.1417 | -0.1664 |
|             |         |         |         |             |         |         | 0.1809 |             |         |         |         |
| H           | -3.8706 | -3.9044 | 0.3558  | H           | -3.2558 | -3.4940 | -      | H           | -3.2705 | -3.4866 | -1.7305 |
|             |         |         |         |             |         |         | 1.7384 |             |         |         |         |
| H           | -3.7778 | -2.6638 | -2.1795 | H           | -1.0434 | -3.7886 | -      | H           | -1.0411 | -3.7799 | -0.8344 |
|             |         |         |         |             |         |         | 0.8121 |             |         |         |         |
| H           | 2.5335  | -0.3512 | -3.0597 | H           | 2.5708  | 0.1572  | -      | H           | 2.5830  | 0.1865  | -3.0465 |
|             |         |         |         |             |         |         | 3.0476 |             |         |         |         |
| H           | 2.2513  | -2.0280 | -2.5502 | H           | 2.4002  | -1.5757 | -      | H           | 2.4170  | -1.5488 | -2.7138 |
|             |         |         |         |             |         |         | 2.7050 |             |         |         |         |
| H           | 0.9654  | -1.1154 | -3.3452 | H           | 1.0811  | -0.6915 | -      | H           | 1.0966  | -0.6644 | -3.4827 |
|             |         |         |         |             |         |         | 3.4767 |             |         |         |         |

|   |         |         |         |   |         |         |        |   |         |         |         |
|---|---------|---------|---------|---|---------|---------|--------|---|---------|---------|---------|
| H | -2.4145 | 5.0787  | 1.7817  | H | -2.9938 | 4.7648  | 2.0009 | H | -3.0454 | 4.7116  | 1.9842  |
| H | -3.7787 | 5.5857  | 0.7660  | H | -4.3401 | 5.2565  | 0.9543 | H | -4.3795 | 5.2065  | 0.9210  |
| H | -2.1817 | 5.3151  | 0.0353  | H | -2.6897 | 5.1832  | 0.3001 | H | -2.7319 | 5.1124  | 0.2802  |
| H | 1.5642  | 4.1122  | -2.0053 | H | 1.2815  | 4.4214  | -      | H | 1.2684  | 4.4413  | -1.6067 |
|   |         |         |         |   |         |         | 1.6459 |   |         |         |         |
| H | 0.4108  | 3.1667  | -2.9658 | H | 0.2310  | 3.5016  | -      | H | 0.2215  | 3.5282  | -2.7106 |
|   |         |         |         |   |         |         | 2.7406 |   |         |         |         |
| H | -0.0105 | 3.6577  | -1.3317 | H | -0.2873 | 3.8126  | -      | H | -0.2956 | 3.8159  | -1.0555 |
|   |         |         |         |   |         |         | 1.0902 |   |         |         |         |
| H | 5.5675  | 0.2864  | 3.0270  | H | 5.2864  | 0.3921  | 3.2227 | H | 5.2882  | 0.3956  | 3.2291  |
| H | 6.8338  | 0.7991  | 1.9017  | H | 6.5699  | 1.0740  | 2.2125 | H | 6.5709  | 1.0865  | 2.2239  |
| H | 6.7116  | -0.8999 | 2.3828  | H | 6.5286  | -0.6653 | 2.5374 | H | 6.5341  | -0.6547 | 2.5395  |
| H | -3.8886 | -1.9777 | 2.8371  | H | -3.7648 | -2.5902 | 2.5570 | H | -3.7379 | -2.5710 | 2.5660  |
| H | -2.9500 | -3.4768 | 2.6258  | H | -2.5593 | -3.8582 | 2.1998 | H | -2.5491 | -3.8546 | 2.2074  |
| H | -2.2236 | -2.0884 | 3.4671  | H | -2.1100 | -2.4601 | 3.2076 | H | -2.0783 | -2.4577 | 3.2071  |
| H | -4.4690 | 2.2392  | 1.4265  | H | -4.7721 | 1.8152  | 1.2710 | H | -5.4093 | 3.1481  | 1.5076  |
| N | -2.3458 | -1.8532 | 1.4148  | N | -2.2729 | -2.0374 | 1.1872 | N | -2.2478 | -2.0411 | 1.1864  |
| O | 0.2676  | -2.7031 | -0.7772 | O | 0.3505  | -2.5305 | -      | O | 0.3656  | -2.5187 | -1.1883 |
|   |         |         |         |   |         |         | 1.1686 |   |         |         |         |
| O | -4.2330 | 3.1696  | 1.5549  | O | -4.6283 | 2.7465  | 1.4947 | O | -4.6316 | 2.5708  | 1.4825  |
| O | -2.4757 | -0.8991 | -1.9617 | O | -2.5346 | -0.8320 | -      | O | -2.5196 | -0.8452 | -2.0959 |
|   |         |         |         |   |         |         | 2.0910 |   |         |         |         |
| O | -0.4260 | -0.9372 | 2.3128  | O | -0.4157 | -1.0524 | 2.1396 | O | -0.3880 | -1.0533 | 2.1305  |
| O | -4.2066 | -3.2424 | -1.5280 | O | -1.7959 | -4.2994 | -      | O | -1.7889 | -4.2956 | -0.4792 |
|   |         |         |         |   |         |         | 0.4597 |   |         |         |         |

Table S7 (continued)

| Conformer 4 |         |         |         | Conformer 5 |         |         |        | Conformer 6 |         |         |         |
|-------------|---------|---------|---------|-------------|---------|---------|--------|-------------|---------|---------|---------|
| C           | 0.2705  | -1.3514 | -0.9128 | C           | 0.2565  | -1.2711 | -      | C           | 0.2727  | -1.4890 | -0.7369 |
|             |         |         |         |             |         |         | 0.9229 |             |         |         |         |
| C           | 1.2880  | -0.3081 | -1.3403 | C           | 1.2784  | -0.2204 | -      | C           | 1.3162  | -0.5216 | -1.2821 |
|             |         |         |         |             |         |         | 1.3224 |             |         |         |         |
| C           | 0.4457  | 1.0007  | -1.3774 | C           | 0.4553  | 1.0999  | -      | C           | 0.5386  | 0.8222  | -1.3767 |
|             |         |         |         |             |         |         | 1.2649 |             |         |         |         |
| C           | 1.2760  | 2.2677  | -1.2953 | C           | 1.3063  | 2.3497  | -      | C           | 1.4293  | 2.0499  | -1.4148 |
|             |         |         |         |             |         |         | 1.1425 |             |         |         |         |
| C           | 2.5509  | 2.2391  | -0.8803 | C           | 2.5918  | 2.2819  | -      | C           | 2.7198  | 1.9850  | -1.0563 |
|             |         |         |         |             |         |         | 0.7663 |             |         |         |         |
| C           | 3.3011  | 1.0019  | -0.4655 | C           | 3.3355  | 1.0143  | -      | C           | 3.4301  | 0.7415  | -0.5938 |
|             |         |         |         |             |         |         | 0.4404 |             |         |         |         |
| C           | 4.2037  | 1.2338  | 0.7644  | C           | 4.2779  | 1.1676  | 0.7716 | C           | 4.4034  | 1.0091  | 0.5732  |
| C           | 5.0399  | -0.0122 | 1.1082  | C           | 5.1067  | -0.1056 | 1.0210 | C           | 5.1965  | -0.2515 | 0.9625  |
| C           | 4.1311  | -1.2448 | 1.2677  | C           | 4.1858  | -1.3335 | 1.1421 | C           | 4.2397  | -1.4234 | 1.2481  |
| C           | 3.2020  | -1.4606 | 0.0613  | C           | 3.2173  | -1.4718 | -      | C           | 3.2428  | -1.6716 | 0.1037  |
|             |         |         |         |             |         |         | 0.0446 |             |         |         |         |
| C           | 2.3674  | -0.1958 | -0.2024 | C           | 2.3930  | -0.1842 | -      | C           | 2.4548  | -0.3877 | -0.2075 |
|             |         |         |         |             |         |         | 0.2139 |             |         |         |         |
| C           | 1.8862  | -0.6743 | -2.7061 | C           | 1.8310  | -0.5213 | -      | C           | 1.8273  | -1.0126 | -2.6444 |
|             |         |         |         |             |         |         | 2.7232 |             |         |         |         |
| C           | -0.6215 | 0.8419  | -0.2404 | C           | -0.5796 | 0.8929  | -      | C           | -0.4900 | 0.7962  | -0.1943 |
|             |         |         |         |             |         |         | 0.1057 |             |         |         |         |
| C           | -1.8448 | 1.7129  | -0.3536 | C           | -1.7767 | 1.8052  | -      | C           | -1.6653 | 1.7298  | -0.3218 |
|             |         |         |         |             |         |         | 0.1183 |             |         |         |         |
| C           | -2.3615 | 2.4154  | 0.6597  | C           | -2.1943 | 2.4896  | 0.9506 | C           | -2.1247 | 2.5008  | 0.6682  |
| C           | -3.6214 | 3.2411  | 0.5816  | C           | -3.4008 | 3.3883  | 0.9950 | C           | -3.3178 | 3.4108  | 0.5547  |
| C           | -3.3830 | 4.7059  | 0.9516  | C           | -4.3966 | 2.9344  | 2.0704 | C           | -2.9472 | 4.8755  | 0.8038  |
| C           | 0.6207  | 3.5473  | -1.7508 | C           | 0.6594  | 3.6593  | -      | C           | 0.8148  | 3.3292  | -1.9248 |
|             |         |         |         |             |         |         | 1.5183 |             |         |         |         |
| C           | 5.9085  | 0.2149  | 2.3497  | C           | 6.0168  | 0.0424  | 2.2445 | C           | 6.1356  | 0.0135  | 2.1437  |
| C           | -1.1857 | -1.2429 | 1.1831  | C           | -1.1915 | -1.2671 | 1.1814 | C           | -1.1475 | -1.1712 | 1.3544  |
| C           | -0.9455 | -0.6833 | -0.2285 | C           | -0.9403 | -0.6208 | -      | C           | -0.9040 | -0.7038 | -0.0854 |
|             |         |         |         |             |         |         | 0.1893 |             |         |         |         |
| C           | -2.1892 | -1.1458 | -0.9935 | C           | -2.1939 | -1.0022 | -      | C           | -2.1879 | -1.1060 | -0.8002 |
|             |         |         |         |             |         |         | 0.9816 |             |         |         |         |
| C           | -2.9847 | -2.1068 | -0.1118 | C           | -3.0131 | -1.9991 | -      | C           | -3.0891 | -1.8621 | 0.1672  |
|             |         |         |         |             |         |         | 0.1625 |             |         |         |         |
| C           | -3.0197 | -3.5541 | -0.6740 | C           | -3.0819 | -3.4045 | -      | C           | -3.3955 | -3.2744 | -0.3887 |
|             |         |         |         |             |         |         | 0.8198 |             |         |         |         |
| C           | -2.7931 | -2.7089 | 2.3488  | C           | -2.8301 | -2.7719 | 2.2510 | C           | -2.8836 | -2.3491 | 2.6568  |
| H           | -0.1044 | 1.0124  | -2.3293 | H           | -0.1238 | 1.1692  | -      | H           | -0.0495 | 0.7986  | -2.3056 |
|             |         |         |         |             |         |         | 2.1968 |             |         |         |         |
| H           | 3.1197  | 3.1697  | -0.8709 | H           | 3.1753  | 3.2025  | -      | H           | 3.3310  | 2.8849  | -1.1343 |
|             |         |         |         |             |         |         | 0.7265 |             |         |         |         |
| H           | 3.9759  | 0.7310  | -1.2954 | H           | 3.9814  | 0.7795  | -      | H           | 4.0489  | 0.3830  | -1.4342 |
|             |         |         |         |             |         |         | 1.3038 |             |         |         |         |
| H           | 4.8678  | 2.0876  | 0.5753  | H           | 4.9479  | 2.0221  | 0.6087 | H           | 5.0965  | 1.8142  | 0.2952  |
| H           | 3.5781  | 1.5077  | 1.6264  | H           | 3.6827  | 1.4018  | 1.6662 | H           | 3.8355  | 1.3707  | 1.4428  |
| H           | 5.7095  | -0.2024 | 0.2548  | H           | 5.7465  | -0.2572 | 0.1375 | H           | 5.8131  | -0.5312 | 0.0939  |
| H           | 4.7452  | -2.1400 | 1.4276  | H           | 4.7917  | -2.2437 | 1.2342 | H           | 4.8182  | -2.3357 | 1.4409  |
| H           | 3.5190  | -1.1222 | 2.1731  | H           | 3.6037  | -1.2526 | 2.0717 | H           | 3.6800  | -1.2100 | 2.1705  |
| H           | 2.5531  | -2.3225 | 0.2468  | H           | 2.5620  | -2.3344 | 0.1140 | H           | 2.5643  | -2.4863 | 0.3756  |
| H           | 3.8042  | -1.7040 | -0.8236 | H           | 3.7888  | -1.6743 | -      | H           | 3.7888  | -2.0013 | -0.7898 |
|             |         |         |         |             |         |         | 0.9597 |             |         |         |         |
| H           | 1.8251  | 0.0197  | 0.7285  | H           | 1.8822  | -0.0126 | 0.7435 | H           | 1.9693  | -0.0844 | 0.7307  |
| H           | -0.1397 | 1.0453  | 0.7212  | H           | -0.0603 | 1.0154  | 0.8503 | H           | 0.0372  | 1.0239  | 0.7375  |
| H           | -2.3437 | 1.7293  | -1.3221 | H           | -2.3315 | 1.8873  | -      | H           | -2.1800 | 1.7353  | -1.2825 |
|             |         |         |         |             |         |         | 1.0493 |             |         |         |         |
| H           | -1.8674 | 2.3983  | 1.6339  | H           | -1.6458 | 2.4184  | 1.8899 | H           | -1.6293 | 2.4970  | 1.6400  |
| H           | -4.0234 | 3.1849  | -0.4363 | H           | -3.0524 | 4.4022  | 1.2621 | H           | -3.7436 | 3.3159  | -0.4567 |
| H           | -4.0198 | -1.7403 | -0.0605 | H           | -4.0394 | -1.6128 | -      | H           | -4.0427 | -1.3258 | 0.2758  |
|             |         |         |         |             |         |         | 0.0868 |             |         |         |         |
| H           | -3.8327 | -4.1003 | -0.1860 | H           | -3.9078 | -3.9631 | -      | H           | -2.4477 | -3.7883 | -0.6057 |
|             |         |         |         |             |         |         | 0.3687 |             |         |         |         |
| H           | -3.2697 | -3.4800 | -1.7439 | H           | -3.3295 | -3.2530 | -      | H           | -3.9284 | -3.8543 | 0.3705  |
|             |         |         |         |             |         |         | 1.8821 |             |         |         |         |
| H           | -1.0754 | -3.7863 | -0.7723 | H           | -1.1414 | -3.6730 | -      | H           | -3.7995 | -2.6220 | -2.1663 |
|             |         |         |         |             |         |         | 0.9248 |             |         |         |         |
| H           | 2.5899  | 0.0921  | -3.0408 | H           | 2.5386  | 0.2507  | -      | H           | 2.5612  | -0.3178 | -3.0613 |
|             |         |         |         |             |         |         | 3.0361 |             |         |         |         |
| H           | 2.4072  | -1.6337 | -2.6697 | H           | 2.3353  | -1.4898 | -      | H           | 2.2885  | -1.9997 | -2.5634 |
|             |         |         |         |             |         |         | 2.7544 |             |         |         |         |
| H           | 1.0956  | -0.7539 | -3.4592 | H           | 1.0179  | -0.5461 | -      | H           | 0.9990  | -1.0907 | -3.3563 |
|             |         |         |         |             |         |         | 3.4559 |             |         |         |         |
| H           | -2.9691 | 4.7889  | 1.9643  | H           | -4.7719 | 1.9323  | 1.8391 | H           | -2.5016 | 4.9954  | 1.7970  |

|   |         |         |         |   |         |         |        |   |         |         |         |
|---|---------|---------|---------|---|---------|---------|--------|---|---------|---------|---------|
| H | -4.3264 | 5.2603  | 0.9201  | H | -5.2479 | 3.6234  | 2.1202 | H | -3.8389 | 5.5121  | 0.7486  |
| H | -2.6774 | 5.1800  | 0.2613  | H | -3.9274 | 2.9116  | 3.0597 | H | -2.2337 | 5.2357  | 0.0555  |
| H | 1.3155  | 4.3907  | -1.6970 | H | 1.3645  | 4.4911  | -      | H | 1.5522  | 4.1366  | -1.9629 |
|   |         |         |         |   |         |         | 1.4278 |   |         |         |         |
| H | 0.2691  | 3.4615  | -2.7877 | H | 0.2952  | 3.6330  | -      | H | 0.4061  | 3.1939  | -2.9352 |
|   |         |         |         |   |         |         | 2.5541 |   |         |         |         |
| H | -0.2584 | 3.7914  | -1.1442 | H | -0.2112 | 3.8787  | -      | H | -0.0182 | 3.6596  | -1.2944 |
|   |         |         |         |   |         |         | 0.8906 |   |         |         |         |
| H | 5.2893  | 0.4118  | 3.2337  | H | 5.4287  | 0.1976  | 3.1575 | H | 5.5712  | 0.2982  | 3.0403  |
| H | 6.5797  | 1.0714  | 2.2174  | H | 6.6952  | 0.8969  | 2.1377 | H | 6.8381  | 0.8254  | 1.9224  |
| H | 6.5279  | -0.6626 | 2.5684  | H | 6.6308  | -0.8531 | 2.3948 | H | 6.7242  | -0.8772 | 2.3923  |
| H | -3.8514 | -2.4882 | 2.5228  | H | -3.8826 | -2.5415 | 2.4465 | H | -3.8600 | -1.8913 | 2.8513  |
| H | -2.6656 | -3.7882 | 2.2189  | H | -2.7268 | -3.8419 | 2.0451 | H | -3.0011 | -3.4367 | 2.6286  |
| H | -2.2087 | -2.3796 | 3.2082  | H | -2.2352 | -2.5163 | 3.1281 | H | -2.1952 | -2.0863 | 3.4602  |
| H | -4.3534 | 2.7510  | 2.3298  | H | -4.7757 | 3.9981  | -      | H | -4.9995 | 3.5914  | 1.5370  |
|   |         |         |         |   |         |         | 0.2418 |   |         |         |         |
| N | -2.3184 | -1.9948 | 1.1769  | N | -2.3444 | -1.9876 | 1.1296 | N | -2.3309 | -1.8462 | 1.4098  |
| O | 0.3510  | -2.5517 | -1.1188 | O | 0.3191  | -2.4619 | -      | O | 0.3027  | -2.7000 | -0.8040 |
|   |         |         |         |   |         |         | 1.1838 |   |         |         |         |
| O | -4.6491 | 2.6685  | 1.4100  | O | -4.0088 | 3.4104  | -      | O | -4.2680 | 2.9559  | 1.5321  |
|   |         |         |         |   |         |         | 0.2950 |   |         |         |         |
| O | -2.4929 | -0.8412 | -2.1263 | O | -2.4877 | -0.6227 | -      | O | -2.4458 | -0.9300 | -1.9773 |
|   |         |         |         |   |         |         | 2.0942 |   |         |         |         |
| O | -0.4688 | -1.0190 | 2.1531  | O | -0.4670 | -1.1289 | 2.1614 | O | -0.3908 | -0.9616 | 2.2959  |
| O | -1.8408 | -4.2841 | -0.4294 | O | -1.9211 | -4.1773 | -      | O | -4.2422 | -3.1952 | -1.5189 |
|   |         |         |         |   |         |         | 0.6261 |   |         |         |         |



**Table S8.** Cartesian coordinates of the six lowest-energy conformers of the 3'R,5'S stereoisomer of pyrenosetins E at the B3LYP/TZVP/SMD(CHCl<sub>3</sub>)/B3LYP/6-31+G(d,p)/SMD(CHCl<sub>3</sub>) level.

| Conformer 1 |         |         |         | Conformer 2 |         |         |        | Conformer 3 |         |         |         |
|-------------|---------|---------|---------|-------------|---------|---------|--------|-------------|---------|---------|---------|
| C           | -0.2473 | -1.4204 | 0.7068  | C           | -0.2179 | -1.3681 | 0.8864 | C           | -0.2539 | -1.4240 | 0.6934  |
| C           | -1.2537 | -0.4161 | 1.2469  | C           | -1.3060 | -0.3897 | 1.3144 | C           | -1.2594 | -0.4208 | 1.2391  |
| C           | -0.4325 | 0.9048  | 1.3168  | C           | -0.5768 | 0.9846  | 1.2996 | C           | -0.4363 | 0.8992  | 1.3159  |
| C           | -1.2809 | 2.1614  | 1.3367  | C           | -1.5097 | 2.1767  | 1.2028 | C           | -1.2822 | 2.1572  | 1.3368  |
| C           | -2.5783 | 2.1322  | 0.9993  | C           | -2.7900 | 2.0319  | 0.8310 | C           | -2.5801 | 2.1315  | 1.0013  |
| C           | -3.3357 | 0.9052  | 0.5704  | C           | -3.4484 | 0.7261  | 0.4764 | C           | -3.3404 | 0.9066  | 0.5711  |
| C           | -4.3208 | 1.1884  | -0.5833 | C           | -4.4091 | 0.8485  | -      | C           | -4.3278 | 1.1954  | -0.5791 |
|             |         |         |         |             |         |         | 0.7247 |             |         |         |         |
| C           | -5.1618 | -0.0495 | -0.9420 | C           | -5.1513 | -0.4703 | -      | C           | -5.1706 | -0.0402 | -0.9416 |
|             |         |         |         |             |         |         | 1.0060 |             |         |         |         |
| C           | -4.2481 | -1.2544 | -1.2295 | C           | -4.1489 | -1.6274 | -      | C           | -4.2581 | -1.2440 | -1.2372 |
|             |         |         |         |             |         |         | 1.1684 |             |         |         |         |
| C           | -3.2401 | -1.5212 | -0.0991 | C           | -3.1645 | -1.7326 | 0.0085 | C           | -3.2482 | -1.5169 | -0.1100 |
| C           | -2.4040 | -0.2612 | 0.1846  | C           | -2.4268 | -0.3981 | 0.2135 | C           | -2.4104 | -0.2591 | 0.1790  |
| C           | -1.7620 | -0.8745 | 2.6235  | C           | -1.8273 | -0.7708 | 2.7087 | C           | -1.7668 | -0.8860 | 2.6139  |
| C           | 0.5978  | 0.8088  | 0.1377  | C           | 0.4882  | 0.8748  | 0.1523 | C           | 0.5977  | 0.8054  | 0.1406  |
| C           | 1.7805  | 1.7370  | 0.2107  | C           | 1.6096  | 1.8785  | 0.1903 | C           | 1.7866  | 1.7253  | 0.2145  |
| C           | 2.1949  | 2.5127  | -0.7973 | C           | 1.9938  | 2.6214  | -      | C           | 2.2164  | 2.4783  | -0.8021 |
|             |         |         |         |             |         |         | 0.8538 |             |         |         |         |
| C           | 3.4045  | 3.4099  | -0.7405 | C           | 3.1465  | 3.5918  | -      | C           | 3.4254  | 3.3728  | -0.7496 |
|             |         |         |         |             |         |         | 0.8306 |             |         |         |         |
| C           | 3.0685  | 4.8663  | -1.0443 | C           | 2.7302  | 5.0075  | -      | C           | 3.0626  | 4.8439  | -0.9722 |
|             |         |         |         |             |         |         | 1.2165 |             |         |         |         |
| C           | -0.6210 | 3.4284  | 1.8204  | C           | -0.9543 | 3.5193  | 1.6075 | C           | -0.6172 | 3.4230  | 1.8168  |
| C           | -6.1134 | 0.2316  | -2.1093 | C           | -6.0796 | -0.3499 | -      | C           | -6.1250 | 0.2470  | -2.1051 |
|             |         |         |         |             |         |         | 2.2188 |             |         |         |         |
| C           | 2.2098  | -1.0669 | 1.0036  | C           | 2.2043  | -0.8566 | 1.1297 | C           | 2.1974  | -1.0735 | 1.0199  |
| C           | 0.9937  | -0.6968 | 0.1321  | C           | 0.9749  | -0.5994 | 0.2436 | C           | 0.9921  | -0.7000 | 0.1342  |
| C           | 1.3655  | -1.2682 | -1.2306 | C           | 1.3688  | -1.2329 | -      | C           | 1.3804  | -1.2662 | -1.2260 |
|             |         |         |         |             |         |         | 1.0819 |             |         |         |         |
| C           | 2.6237  | -2.1220 | -1.0928 | C           | 2.6448  | -2.0524 | -      | C           | 2.6418  | -2.1127 | -1.0781 |
|             |         |         |         |             |         |         | 0.8846 |             |         |         |         |
| C           | 2.3639  | -3.6317 | -1.3480 | C           | 2.3754  | -3.5452 | -      | C           | 2.3924  | -3.6193 | -1.3553 |
|             |         |         |         |             |         |         | 1.1056 |             |         |         |         |
| C           | 4.2730  | -2.4062 | 0.8213  | C           | 4.3310  | -2.1013 | 1.0373 | C           | 4.2693  | -2.4002 | 0.8534  |
| H           | 0.1583  | 0.8760  | 2.2423  | H           | -0.0110 | 1.0671  | 2.2376 | H           | 0.1512  | 0.8665  | 2.2432  |
| H           | -3.1594 | 3.0523  | 1.0716  | H           | -3.4340 | 2.9120  | 0.8164 | H           | -3.1587 | 3.0531  | 1.0744  |
| H           | -3.9504 | 0.5787  | 1.4265  | H           | -4.0694 | 0.4245  | 1.3372 | H           | -3.9533 | 0.5777  | 1.4276  |
| H           | -4.9811 | 2.0197  | -0.3035 | H           | -5.1341 | 1.6506  | -      | H           | -4.9870 | 2.0260  | -0.2943 |
|             |         |         |         |             |         |         | 0.5334 |             |         |         |         |
| H           | -3.7572 | 1.5204  | -1.4676 | H           | -3.8388 | 1.1481  | -      | H           | -3.7660 | 1.5308  | -1.4632 |
|             |         |         |         |             |         |         | 1.6161 |             |         |         |         |
| H           | -5.7708 | -0.2988 | -0.0590 | H           | -5.7717 | -0.6913 | -      | H           | -5.7775 | -0.2935 | -0.0583 |
|             |         |         |         |             |         |         | 0.1233 |             |         |         |         |
| H           | -4.8580 | -2.1504 | -1.4006 | H           | -4.6912 | -2.5743 | -      | H           | -4.8686 | -2.1388 | -1.4118 |
|             |         |         |         |             |         |         | 1.2844 |             |         |         |         |
| H           | -3.6992 | -1.0697 | -2.1648 | H           | -3.5820 | -1.4786 | -      | H           | -3.7108 | -1.0547 | -2.1725 |
|             |         |         |         |             |         |         | 2.0993 |             |         |         |         |
| H           | -2.5958 | -2.3628 | -0.3708 | H           | -2.4542 | -2.5448 | -      | H           | -2.6048 | -2.3575 | -0.3868 |
|             |         |         |         |             |         |         | 0.1746 |             |         |         |         |
| H           | -3.7817 | -1.8206 | 0.8074  | H           | -3.7155 | -1.9977 | 0.9201 | H           | -3.7886 | -1.8204 | 0.7959  |
| H           | -1.9232 | 0.0195  | -0.7636 | H           | -1.9342 | -0.1607 | -      | H           | -1.9299 | 0.0258  | -0.7681 |
|             |         |         |         |             |         |         | 0.7404 |             |         |         |         |
| H           | 0.0715  | 0.9890  | -0.8061 | H           | -0.0251 | 0.9657  | -      | H           | 0.0745  | 0.9871  | -0.8049 |
|             |         |         |         |             |         |         | 0.8112 |             |         |         |         |
| H           | 2.3339  | 1.7389  | 1.1493  | H           | 2.1455  | 1.9653  | 1.1348 | H           | 2.3375  | 1.7273  | 1.1541  |
| H           | 1.6567  | 2.5114  | -1.7467 | H           | 1.4743  | 2.5339  | -      | H           | 1.6830  | 2.4709  | -1.7537 |
|             |         |         |         |             |         |         | 1.8096 |             |         |         |         |
| H           | 3.8509  | 3.3452  | 0.2642  | H           | 3.5802  | 3.6074  | 0.1817 | H           | 3.9049  | 3.2673  | 0.2363  |
| H           | 3.3547  | -1.7780 | -1.8380 | H           | 3.3996  | -1.7314 | -      | H           | 3.3827  | -1.7538 | -1.8062 |
|             |         |         |         |             |         |         | 1.6164 |             |         |         |         |
| H           | 1.7833  | -3.7063 | -2.2807 | H           | 1.6927  | -3.9067 | -      | H           | 1.8336  | -3.6848 | -2.3019 |
|             |         |         |         |             |         |         | 0.3261 |             |         |         |         |
| H           | 3.3236  | -4.1284 | -1.5205 | H           | 1.8780  | -3.6521 | -      | H           | 3.3565  | -4.1132 | -1.5107 |
|             |         |         |         |             |         |         | 2.0807 |             |         |         |         |
| H           | 0.9340  | -3.8318 | -0.0195 | H           | 3.4361  | -5.1771 | -      | H           | 0.9365  | -3.8309 | -0.0559 |
|             |         |         |         |             |         |         | 1.0674 |             |         |         |         |
| H           | -2.4573 | -0.1429 | 3.0433  | H           | -2.5882 | -0.0632 | 3.0485 | H           | -2.4608 | -0.1559 | 3.0385  |
| H           | -2.2680 | -1.8406 | 2.5606  | H           | -2.2584 | -1.7747 | 2.7117 | H           | -2.2738 | -1.8512 | 2.5465  |
| H           | -0.9249 | -0.9799 | 3.3209  | H           | -1.0090 | -0.7576 | 3.4358 | H           | -0.9289 | -0.9959 | 3.3096  |
| H           | 2.5994  | 4.9546  | -2.0301 | H           | 2.2700  | 5.0151  | -      | H           | 2.5635  | 4.9748  | -1.9382 |
|             |         |         |         |             |         |         | 2.2103 |             |         |         |         |
| H           | 3.9820  | 5.4694  | -1.0436 | H           | 3.6069  | 5.6627  | -      | H           | 3.9655  | 5.4671  | -0.9651 |
|             |         |         |         |             |         |         | 1.2394 |             |         |         |         |

|   |         |         |         |   |         |         |        |   |         |         |         |
|---|---------|---------|---------|---|---------|---------|--------|---|---------|---------|---------|
| H | 2.3829  | 5.2720  | -0.2945 | H | 2.0123  | 5.4117  | -      | H | 2.3980  | 5.2109  | -0.1833 |
|   |         |         |         |   |         |         | 0.4967 |   |         |         |         |
| H | -1.3327 | 4.2588  | 1.8532  | H | -1.7209 | 4.2984  | 1.5561 | H | -1.3265 | 4.2554  | 1.8517  |
| H | -0.2068 | 3.2948  | 2.8287  | H | -0.5671 | 3.4899  | 2.6348 | H | -0.1987 | 3.2894  | 2.8232  |
| H | 0.2155  | 3.7229  | 1.1776  | H | -0.1176 | 3.8228  | 0.9692 | H | 0.2172  | 3.7142  | 1.1695  |
| H | -5.5570 | 0.4879  | -3.0194 | H | -5.5113 | -0.1276 | -      | H | -5.5707 | 0.5074  | -3.0154 |
|   |         |         |         |   |         |         | 3.1306 |   |         |         |         |
| H | -6.7856 | 1.0680  | -1.8851 | H | -6.8142 | 0.4522  | -      | H | -6.7962 | 1.0826  | -1.8753 |
|   |         |         |         |   |         |         | 2.0824 |   |         |         |         |
| H | -6.7345 | -0.6427 | -2.3364 | H | -6.6318 | -1.2809 | -      | H | -6.7470 | -0.6259 | -2.3349 |
|   |         |         |         |   |         |         | 2.3918 |   |         |         |         |
| H | 4.1534  | -3.4863 | 0.9518  | H | 4.3524  | -3.1787 | 1.2144 | H | 4.1671  | -3.4843 | 0.9650  |
| H | 5.1246  | -2.2137 | 0.1607  | H | 5.1459  | -1.8470 | 0.3513 | H | 5.1263  | -2.1818 | 0.2080  |
| H | 4.4566  | -1.9459 | 1.7923  | H | 4.4666  | -1.5683 | 1.9787 | H | 4.4316  | -1.9525 | 1.8341  |
| H | 4.5829  | 2.0806  | -1.5585 | H | 4.4065  | 2.2904  | -      | H | 5.0538  | 3.5340  | -1.8211 |
|   |         |         |         |   |         |         | 1.5679 |   |         |         |         |
| N | 3.0654  | -1.8225 | 0.2627  | N | 3.0552  | -1.6903 | 0.4696 | N | 3.0598  | -1.8284 | 0.2880  |
| O | -0.3725 | -2.6339 | 0.7193  | O | -0.2312 | -2.5730 | 1.0332 | O | -0.3835 | -2.6372 | 0.6929  |
| O | 4.3664  | 3.0086  | -1.7317 | O | 4.1464  | 3.1973  | -      | O | 4.3137  | 2.9100  | -1.7802 |
|   |         |         |         |   |         |         | 1.7865 |   |         |         |         |
| O | 0.7634  | -1.0855 | -2.2662 | O | 0.7755  | -1.1208 | -      | O | 0.7846  | -1.0871 | -2.2658 |
|   |         |         |         |   |         |         | 2.1326 |   |         |         |         |
| O | 2.3681  | -0.7322 | 2.1734  | O | 2.3719  | -0.3973 | 2.2560 | O | 2.3400  | -0.7431 | 2.1934  |
| O | 1.7579  | -4.2933 | -0.2633 | O | 3.6233  | -4.2276 | -      | O | 1.7616  | -4.2940 | -0.2921 |
|   |         |         |         |   |         |         | 1.0801 |   |         |         |         |

Table S8 (continued)

| Conformer 4 |         |         |         | Conformer 5 |         |         |        | Conformer 6 |         |        |         |
|-------------|---------|---------|---------|-------------|---------|---------|--------|-------------|---------|--------|---------|
| C           | -0.2906 | -1.3291 | 1.0058  | C           | -0.2601 | -1.3373 | 0.7211 | C           | -0.2618 | -      | 0.7040  |
| C           | -1.3091 | -0.2526 | 1.3651  | C           | -1.2611 | -0.3081 | 1.2259 | C           | -1.2661 | 1.3552 | 1.2246  |
| C           | -0.4844 | 1.0641  | 1.2806  | C           | -0.4484 | 1.0208  | 1.1951 | C           | -0.4534 | 0.3367 | 1.2239  |
| C           | -1.3281 | 2.3119  | 1.1019  | C           | -1.3061 | 2.2707  | 1.1575 | C           | -1.3087 | 0.9922 | 1.2091  |
| C           | -2.6132 | 2.2365  | 0.7262  | C           | -2.6126 | 2.2124  | 0.8613 | C           | -1.3087 | 2.2438 | 1.2091  |
| C           | -3.3609 | 0.9622  | 0.4418  | C           | -2.6126 | 2.2124  | 0.8613 | C           | -2.6134 | 2.1933 | 0.9033  |
| C           | -4.3039 | 1.0827  | -0.7735 | C           | -3.3722 | 0.9562  | 0.5324 | C           | -3.3726 | 0.9442 | 0.5460  |
| C           | -5.1365 | -0.1942 | -0.9859 | C           | -4.3949 | 1.1624  | -      | C           | -4.3893 | 1.1731 | -0.5920 |
| C           | -4.2182 | -1.4266 | -1.0721 | C           | -5.2351 | -0.1008 | 0.6046 | C           | -5.2300 | -      | -0.8784 |
| C           | -3.2507 | -1.5333 | 0.1186  | C           | -4.3190 | -1.3134 | 0.8628 | C           | -4.3145 | 0.0836 | -1.1409 |
| C           | -2.4206 | -0.2451 | 0.2543  | C           | -3.2754 | -1.5051 | 1.1066 | C           | -3.2766 | 1.2928 | -0.0267 |
| C           | -1.8655 | -0.5155 | 2.7733  | C           | -2.4420 | -0.2248 | 0.0064 | C           | -2.4424 | 1.5071 | 0.1856  |
| C           | 0.5820  | 0.8134  | 0.1570  | C           | -1.7273 | -0.6875 | 0.1901 | C           | -2.4424 | -      | 0.2317  |
| C           | 1.7689  | 1.7389  | 0.1513  | C           | -1.7273 | -0.6875 | 2.6412 | C           | -1.7386 | 0.7445 | 2.6298  |
| C           | 2.2229  | 2.3811  | -0.9308 | C           | 0.5561  | 0.8550  | 0.0011 | C           | 0.5531  | 0.8508 | 0.0295  |
| C           | 3.4403  | 3.2692  | -0.9448 | C           | 1.7287  | 1.7971  | -      | C           | 1.7172  | 1.8035 | 0.0149  |
| C           | 3.1339  | 4.6783  | -1.4418 | C           | 2.0679  | 2.5313  | 0.0308 | C           | 2.0543  | 2.5393 | -1.0483 |
| C           | -0.6805 | 3.6335  | 1.4321  | C           | 3.2604  | 3.4570  | 1.0949 | C           | 3.2251  | 3.4822 | -1.1229 |
| C           | -6.0476 | -0.0786 | -2.2122 | C           | 4.2996  | 2.9541  | 1.1691 | C           | 4.1858  | 3.0918 | -2.2539 |
| C           | 2.1574  | -0.9533 | 1.2885  | C           | -0.6446 | 3.5715  | 2.1721 | C           | -0.6458 | 3.5328 | 1.6269  |
| C           | 0.9688  | -0.6828 | 0.3516  | C           | -6.2250 | 0.1030  | 1.5399 | C           | -6.2141 | 0.1435 | -2.0305 |
| C           | 1.3569  | -1.4181 | -0.9179 | C           | 2.1883  | -0.9300 | 2.0141 | C           | 2.1834  | -      | 1.0113  |
| C           | 2.6276  | -2.2197 | -0.6739 | C           | 0.9717  | -0.6415 | 1.0014 | C           | 0.9736  | 0.9469 | 0.1040  |
| C           | 2.3423  | -3.7296 | -0.8730 | C           | 1.3608  | -1.3007 | 0.0987 | C           | 1.3760  | 0.6456 | -1.2215 |
| C           | 4.2411  | -2.2787 | 1.2970  | C           | 2.6342  | -2.1180 | 1.2182 | C           | 2.6513  | 1.2781 | -1.0242 |
| H           | 0.0769  | 1.1620  | 2.2198  | C           | 2.4010  | -3.6454 | 1.0152 | C           | 2.4239  | 2.0938 | -1.2086 |
| H           | -3.1925 | 3.1577  | 0.6536  | C           | 4.2825  | -2.2297 | 1.1679 | C           | 4.2821  | 3.6184 | 0.9207  |
| H           | -4.0067 | 0.7563  | 1.3125  | C           | 0.1632  | 1.0532  | 0.9173 | C           | 0.1566  | 2.2390 | 2.1367  |
| H           | -4.9709 | 1.9438  | -0.6349 | H           | -3.1988 | 3.1316  | 2.1065 | H           | -3.1990 | 1.0059 | 2.1367  |
| H           | -3.7088 | 1.2896  | -1.6750 | H           | -3.9568 | 0.6787  | 0.8933 | H           | -3.9623 | 3.1122 | 0.9502  |
| H           | -5.7757 | -0.3192 | -0.0979 | H           | -5.0540 | 2.0041  | 1.4262 | H           | -5.0486 | 0.6499 | 1.4310  |
| H           | -4.8257 | -2.3380 | -1.1390 | H           | -3.8619 | 1.4452  | -      | H           | -5.0486 | 2.0110 | -0.3293 |
| H           | -3.6367 | -1.3725 | -2.0044 | H           | -5.8142 | -0.3018 | 0.3542 | H           | -3.8513 | 1.4725 | -1.5035 |
| H           | -2.5993 | -2.4031 | -0.0108 | H           | -4.9251 | -2.2227 | 1.5242 | H           | -5.8138 | -      | 0.0296  |
| H           | -3.8246 | -1.7054 | 1.0384  | H           | -3.8001 | -1.1801 | 0.0521 | H           | -4.9215 | 0.3012 | -1.2607 |
| H           | -1.9059 | -0.0991 | -0.7064 | H           | -2.6319 | -2.3566 | 1.2061 | H           | -3.7908 | 2.1991 | -2.0965 |
| H           | 0.0857  | 0.8762  | -0.8175 | H           | -3.7871 | -1.7541 | 2.0674 | H           | -2.6328 | 1.1420 | -0.2801 |
| H           | 2.2923  | 1.8546  | 1.0999  | H           | -1.9900 | 0.0020  | 0.2342 | H           | -3.7934 | 2.3547 | 0.9044  |
| H           | 1.7160  | 2.2651  | -1.8904 | H           | 0.0022  | 0.9560  | 0.9449 | H           | -1.9861 | 1.7732 | -0.7844 |
| H           | 3.8509  | 3.3285  | 0.0754  | H           | 0.0857  | 0.8762  | 0.7864 | H           | 0.0000  | 0.0132 | -0.7844 |
| H           | 3.4006  | -1.9260 | -1.3976 | H           | 2.2923  | 1.8546  | 0.9389 | H           | 0.0000  | 0.9624 | -0.9100 |
| H           | 3.2158  | -4.3087 | -0.5596 | H           | 1.7160  | 2.2651  | 0.8647 | H           | 2.3171  | 1.8663 | 0.9188  |
| H           | 1.4933  | -4.0224 | -0.2389 | H           | 3.8509  | 3.3285  | -      | H           | 1.4590  | 2.4826 | -1.9599 |
|             |         |         |         | H           | 3.4006  | -1.9260 | 2.0018 | H           | 2.8290  | 4.4889 | -1.3474 |
|             |         |         |         | H           | 3.2158  | -4.3087 | 1.5185 | H           | 3.3867  | -      | -1.7742 |
|             |         |         |         | H           | 1.4933  | -4.0224 | 1.7770 | H           | 1.8679  | 1.7703 | -2.1500 |
|             |         |         |         | H           | 3.3699  | -4.1387 | 2.1009 | H           | 3.3953  | 3.7504 | -1.3322 |
|             |         |         |         |             |         |         | 1.2918 |             |         | 4.1071 |         |

|   |         |         |         |   |         |         |        |   |         |        |         |
|---|---------|---------|---------|---|---------|---------|--------|---|---------|--------|---------|
| H | 1.3875  | -3.4636 | -2.5396 | H | 0.9519  | -3.7761 | 0.1483 | H | 0.9624  | -      | 0.0911  |
| H | -2.5746 | 0.2640  | 3.0644  | H | -2.4180 | 0.0621  | 3.0363 | H | -2.4305 | 3.7770 | 3.0368  |
| H | -2.3690 | -1.4835 | 2.8280  | H | -2.2256 | -1.6597 | 2.6498 | H | -2.2375 | -      | 2.6171  |
| H | -1.0531 | -0.5203 | 3.5071  | H | -0.8703 | -0.7444 | 3.3198 | H | -0.8846 | 1.7164 | 3.3108  |
| H | 2.6998  | 4.6451  | -2.4468 | H | 4.6922  | 1.9839  | -      | H | 4.6071  | 0.8152 | -2.0659 |
| H | 4.0545  | 5.2689  | -1.4849 | H | 5.1307  | 3.6626  | 1.8509 | H | 5.0088  | 2.0990 | -2.3248 |
| H | 2.4286  | 5.1815  | -0.7738 | H | 3.8571  | 2.8387  | -      | H | 3.6723  | 3.8128 | -3.2211 |
| H | -1.3900 | 4.4599  | 1.3287  | H | -1.3652 | 4.3947  | 2.2416 | H | -1.3578 | 3.0759 | -3.2211 |
| H | -0.3006 | 3.6377  | 2.4625  | H | -0.1906 | 3.5023  | 3.1662 | H | -0.2256 | 4.3638 | 1.6256  |
| H | 0.1780  | 3.8398  | 0.7838  | H | 0.1622  | 3.8359  | 1.5514 | H | 0.1885  | 3.4458 | 2.6378  |
| H | -5.4603 | 0.0492  | -3.1300 | H | -5.6997 | 0.3086  | 2.5374 | H | -5.6838 | 3.7958 | 0.9678  |
| H | -6.7237 | 0.7802  | -2.1289 | H | -6.8977 | 0.9463  | 0.8477 | H | -6.8866 | 0.3664 | -2.9647 |
| H | -6.6641 | -0.9765 | -2.3363 | H | -6.8447 | -0.7878 | -      | H | -6.8341 | 0.9838 | -1.8224 |
| H | 4.2162  | -3.3494 | 1.5228  | H | 4.1924  | -3.3006 | 1.8189 | H | 4.1933  | -      | -2.2055 |
| H | 5.0859  | -2.0773 | 0.6293  | H | 5.1287  | -2.0620 | 2.1689 | H | 5.1350  | 0.7433 | 1.1057  |
| H | 4.3727  | -1.7241 | 2.2263  | H | 4.4534  | -1.6955 | 1.1255 | H | 4.4415  | -      | 0.2594  |
| H | 4.6248  | 1.8351  | -1.5481 | H | 3.3017  | 3.9804  | 0.2433 | H | 4.6377  | 2.0548 | 1.8682  |
| N | 2.9995  | -1.8381 | 0.6817  | N | 3.0606  | -1.7199 | 1.8521 | N | 3.0650  | 1.7239 | 4.1042  |
| O | -0.3948 | -2.5210 | 1.2058  | O | -0.3838 | -2.5489 | 0.7101 | O | -0.3849 | 4.1042 | 0.0643  |
| O | 4.4309  | 2.7373  | -1.8420 | O | 3.9338  | 3.6042  | 0.0799 | O | 3.8900  | -      | 0.3211  |
| O | 0.7326  | -1.4222 | -1.9626 | O | 0.7593  | -1.2059 | -      | O | 0.7831  | 1.7202 | 0.7514  |
| O | 2.3068  | -0.4663 | 2.4045  | O | 2.3317  | -0.5134 | 2.2660 | O | 2.3156  | 2.5684 | 0.1385  |
| O | 2.1260  | -4.0187 | -2.2406 | O | 1.7877  | -4.2388 | 2.1468 | O | 1.8008  | 3.4945 | -2.2727 |
|   |         |         |         |   |         |         | 0.0478 |   |         | 1.1659 | 2.1663  |
|   |         |         |         |   |         |         |        |   |         | 0.5545 | -0.1064 |
|   |         |         |         |   |         |         |        |   |         | 4.2346 |         |

**Table S9.** Cartesian coordinates of the six lowest-energy conformers of the 3S,5'S stereoisomer of pyrenosetins E at the B3LYP/TZVP/SMD(CHCl<sub>3</sub>)/B3LYP/6-31+G(d,p)/SMD(CHCl<sub>3</sub>) level.

| Conformer 1 |         |         | Conformer 2 |   |         | Conformer 3 |         |   |         |         |         |
|-------------|---------|---------|-------------|---|---------|-------------|---------|---|---------|---------|---------|
| C           | -0.5355 | -1.1797 | 1.2984      | C | -0.5237 | -1.3175     | 1.1506  | C | -0.5095 | -1.3077 | 1.1360  |
| C           | -1.5227 | -0.0260 | 1.4371      | C | -1.4995 | -0.1742     | 1.4008  | C | -1.5146 | -0.1904 | 1.3938  |
| C           | -0.6372 | 1.2261  | 1.1898      | C | -0.6091 | 1.0917      | 1.2550  | C | -0.6555 | 1.0985  | 1.2576  |
| C           | -1.4095 | 2.4602  | 0.7629      | C | -1.3815 | 2.3616      | 0.9500  | C | -1.4576 | 2.3514  | 0.9608  |
| C           | -2.6769 | 2.3758  | 0.3339      | C | -2.6550 | 2.3195      | 0.5323  | C | -2.7298 | 2.2823  | 0.5431  |
| C           | -3.4677 | 1.1001  | 0.2174      | C | -3.4543 | 1.0631      | 0.3135  | C | -3.4987 | 1.0084  | 0.3161  |
| C           | -4.3380 | 1.0574  | -1.0562     | C | -4.3439 | 1.1379      | -0.9452 | C | -4.3905 | 1.0711  | -0.9418 |
| C           | -5.2089 | -0.2104 | -1.1187     | C | -5.2254 | -0.1140     | -1.1044 | C | -5.2415 | -0.2004 | -1.1106 |
| C           | -4.3386 | -1.4702 | -0.9575     | C | -4.3621 | -1.3882     | -1.0683 | C | -4.3477 | -1.4536 | -1.0843 |
| C           | -3.4439 | -1.4192 | 0.2921      | C | -3.4475 | -1.4527     | 0.1662  | C | -3.4315 | -1.5054 | 0.1496  |
| C           | -2.5714 | -0.1528 | 0.2748      | C | -2.5658 | -0.1947     | 0.2467  | C | -2.5801 | -0.2273 | 0.2397  |
| C           | -2.1619 | -0.0413 | 2.8325      | C | -2.1209 | -0.3105     | 2.7985  | C | -2.1327 | -0.3524 | 2.7902  |
| C           | 0.4722  | 0.7814  | 0.1763      | C | 0.4868  | 0.7284      | 0.1953  | C | 0.4454  | 0.7678  | 0.1950  |
| C           | 1.7461  | 1.5829  | 0.2389      | C | 1.7460  | 1.5529      | 0.2627  | C | 1.6885  | 1.6155  | 0.2567  |
| C           | 2.5201  | 1.8706  | -0.8106     | C | 2.4417  | 1.9739      | -0.7981 | C | 2.3879  | 2.0169  | -0.8093 |
| C           | 3.8669  | 2.5253  | -0.6755     | C | 3.7752  | 2.6719      | -0.7006 | C | 3.7353  | 2.6843  | -0.7122 |
| C           | 4.0965  | 3.6464  | -1.6856     | C | 3.8402  | 3.9424      | -1.5410 | C | 3.8650  | 3.9157  | -1.6007 |
| C           | -0.6984 | 3.7854  | 0.8769      | C | -0.6683 | 3.6703      | 1.1809  | C | -0.7725 | 3.6743  | 1.1956  |
| C           | -6.0441 | -0.2593 | -2.4022     | C | -6.0812 | -0.0455     | -2.3734 | C | -6.0988 | -0.1426 | -2.3791 |
| C           | 0.8178  | -1.6113 | -0.7813     | C | 0.9222  | -1.5989     | -0.8869 | C | 0.9682  | -1.5301 | -0.9010 |
| C           | 0.7056  | -0.7310 | 0.4734      | C | 0.7423  | -0.7940     | 0.4046  | C | 0.7433  | -0.7458 | 0.3987  |
| C           | 1.9633  | -1.1030 | 1.2580      | C | 1.9592  | -1.1947     | 1.2344  | C | 1.9647  | -1.1177 | 1.2346  |
| C           | 2.6306  | -2.3032 | 0.5916      | C | 2.6767  | -2.3549     | 0.5363  | C | 2.6738  | -2.2999 | 0.5649  |
| C           | 4.1407  | -2.0953 | 0.3050      | C | 4.1818  | -2.0898     | 0.3764  | C | 4.1924  | -2.1308 | 0.4856  |
| C           | 2.1581  | -3.5114 | -1.5973     | C | 2.2507  | -3.5207     | -1.6916 | C | 2.4179  | -3.3395 | -1.7459 |
| H           | -0.1241 | 1.4559  | 2.1354      | H | -0.0834 | 1.2350      | 2.2105  | H | -0.1331 | 1.2477  | 2.2141  |
| H           | -3.2026 | 3.2935  | 0.0672      | H | -3.1811 | 3.2592      | 0.3597  | H | -3.2775 | 3.2103  | 0.3745  |
| H           | -4.1669 | 1.0605  | 1.0703      | H | -4.1409 | 0.9506      | 1.1698  | H | -4.1821 | 0.8729  | 1.1719  |
| H           | -4.9763 | 1.9502  | -1.0942     | H | -4.9757 | 2.0346      | -0.8946 | H | -5.0439 | 1.9518  | -0.8841 |
| H           | -3.6861 | 1.0999  | -1.9409     | H | -3.7053 | 1.2541      | -1.8330 | H | -3.7552 | 1.2097  | -1.8287 |
| H           | -5.9017 | -0.1743 | -0.2632     | H | -5.9042 | -0.1487     | -0.2379 | H | -5.9193 | -0.2582 | -0.2444 |
| H           | -4.9789 | -2.3607 | -0.9207     | H | -5.0081 | -2.2748     | -1.0988 | H | -4.9722 | -2.3553 | -1.1215 |
| H           | -3.7026 | -1.5808 | -1.8478     | H | -3.7418 | -1.4243     | -1.9758 | H | -3.7270 | -1.4678 | -1.9922 |
| H           | -2.8203 | -2.3179 | 0.3355      | H | -2.8307 | -2.3558     | 0.1215  | H | -2.7932 | -2.3931 | 0.0983  |
| H           | -4.0732 | -1.4291 | 1.1918      | H | -4.0632 | -1.5367     | 1.0712  | H | -4.0450 | -1.6109 | 1.0539  |
| H           | -1.9989 | -0.1795 | -0.6626     | H | -2.0082 | -0.1414     | -0.6989 | H | -2.0240 | -0.1532 | -0.7054 |
| H           | 0.0681  | 0.8267  | -0.8401     | H | 0.0551  | 0.8196      | -0.8069 | H | 0.0092  | 0.8482  | -0.8061 |
| H           | 2.0813  | 1.8744  | 1.2332      | H | 2.1342  | 1.7557      | 1.2602  | H | 2.0713  | 1.8380  | 1.2519  |
| H           | 2.2270  | 1.5705  | -1.8171     | H | 2.0865  | 1.7638      | -1.8087 | H | 2.0411  | 1.7823  | -1.8169 |
| H           | 3.9714  | 2.9206  | 0.3451      | H | 3.9586  | 2.9308      | 0.3549  | H | 3.9060  | 2.9789  | 0.3366  |
| H           | 2.5373  | -3.1569 | 1.2807      | H | 2.5455  | -3.2626     | 1.1448  | H | 2.4797  | -3.1909 | 1.1827  |
| H           | 4.5937  | -1.6975 | 1.2236      | H | 4.5971  | -1.8712     | 1.3633  | H | 4.5511  | -1.8952 | 1.4966  |
| H           | 4.5872  | -3.0791 | 0.1216      | H | 4.6798  | -2.9880     | -0.0108 | H | 4.6462  | -3.0801 | 0.1774  |
| H           | 4.4478  | -0.3539 | -0.6045     | H | 4.1100  | -1.1419     | -1.3364 | H | 5.4491  | -1.1933 | -0.6768 |
| H           | -2.8546 | 0.7953  | 2.9568      | H | -2.8091 | 0.5137      | 3.0036  | H | -2.8413 | 0.4529  | 3.0012  |
| H           | -2.7051 | -0.9722 | 3.0108      | H | -2.6645 | -1.2525     | 2.9019  | H | -2.6528 | -1.3082 | 2.8868  |
| H           | -1.3917 | 0.0459  | 3.6060      | H | -1.3401 | -0.2923     | 3.5659  | H | -1.3528 | -0.3201 | 3.5581  |
| H           | 3.9955  | 3.2689  | -2.7085     | H | 3.6414  | 3.7161      | -2.5943 | H | 3.6679  | 3.6568  | -2.6466 |
| H           | 5.0997  | 4.0735  | -1.5726     | H | 4.8361  | 4.3912      | -1.4697 | H | 4.8787  | 4.3241  | -1.5345 |
| H           | 3.3703  | 4.4527  | -1.5385     | H | 3.1025  | 4.6743      | -1.1972 | H | 3.1571  | 4.6923  | -1.2941 |
| H           | -1.3528 | 4.6139  | 0.5895      | H | -1.3266 | 4.5216      | 0.9829  | H | -1.4488 | 4.5122  | 1.0009  |
| H           | -0.3553 | 3.9632  | 1.9050      | H | -0.3123 | 3.7486      | 2.2168  | H | -0.4170 | 3.7569  | 2.2314  |
| H           | 0.1939  | 3.8230  | 0.2409      | H | 0.2159  | 3.7689      | 0.5407  | H | 0.1086  | 3.7938  | 0.5545  |
| H           | -5.4009 | -0.2952 | -3.2902     | H | -5.4525 | -0.0093     | -3.2718 | H | -5.4713 | -0.0840 | -3.2771 |
| H           | -6.6883 | 0.6230  | -2.4948     | H | -6.7189 | 0.8461      | -2.3787 | H | -6.7580 | 0.7333  | -2.3774 |
| H           | -6.6888 | -1.1456 | -2.4245     | H | -6.7338 | -0.9218     | -2.4615 | H | -6.7300 | -1.0338 | -2.4743 |
| H           | 3.0938  | -3.2598 | -2.1064     | H | 3.2631  | -3.4309     | -2.0993 | H | 3.4103  | -3.0812 | -2.1294 |
| H           | 2.2586  | -4.4916 | -1.1196     | H | 2.1497  | -4.5029     | -1.2164 | H | 2.4408  | -4.3578 | -1.3428 |
| H           | 1.3506  | -3.5477 | -2.3289     | H | 1.5324  | -3.4377     | -2.5073 | H | 1.6977  | -3.2914 | -2.5628 |
| H           | 5.7235  | 1.8400  | -0.8000     | H | 4.7553  | 0.9754      | -0.6785 | H | 4.5584  | 0.9092  | -0.6971 |
| N           | 1.8257  | -2.5043 | -0.6056     | N | 1.9668  | -2.4644     | -0.7330 | N | 2.0002  | -2.3989 | -0.7224 |
| O           | -0.6541 | -2.2943 | 1.7635      | O | -0.6597 | -2.4759     | 1.4850  | O | -0.6181 | -2.4715 | 1.4627  |
| O           | 4.8328  | 1.4651  | -0.8737     | O | 4.8137  | 1.8066      | -1.1813 | O | 4.7497  | 1.7588  | -1.1319 |
| O           | 2.3812  | -0.5577 | 2.2574      | O | 2.3160  | -0.7066     | 2.2839  | O | 2.3249  | -0.6041 | 2.2710  |
| O           | 0.0821  | -1.5308 | -1.7611     | O | 0.2130  | -1.4995     | -1.8815 | O | 0.2980  | -1.4039 | -1.9204 |
| O           | 4.3968  | -1.3029 | -0.8289     | O | 4.4496  | -0.9617     | -0.4469 | O | 4.5131  | -1.0992 | -0.4464 |

Table S9 (continued)

| Conformer 4 |         |         | Conformer 5 |   |         | Conformer 6 |         |   |         |         |         |
|-------------|---------|---------|-------------|---|---------|-------------|---------|---|---------|---------|---------|
| C           | -0.5395 | -1.2371 | 1.2423      | C | 0.3665  | -1.5321     | -0.7966 | C | -0.5343 | -1.4961 | 0.9004  |
| C           | -1.5240 | -0.0870 | 1.4232      | C | 1.3744  | -0.5091     | -1.3070 | C | -1.5196 | -0.4076 | 1.3214  |
| C           | -0.6382 | 1.1730  | 1.2170      | C | 0.5555  | 0.8135      | -1.3446 | C | -0.6471 | 0.8824  | 1.3355  |
| C           | -1.4112 | 2.4211  | 0.8342      | C | 1.4094  | 2.0676      | -1.3395 | C | -1.4363 | 2.1714  | 1.2090  |
| C           | -2.6800 | 2.3516  | 0.4063      | C | 2.7041  | 2.0275      | -0.9926 | C | -2.7170 | 2.1699  | 0.8124  |
| C           | -3.4722 | 1.0813  | 0.2493      | C | 3.4548  | 0.7895      | -0.5829 | C | -3.5090 | 0.9435  | 0.4466  |
| C           | -4.3475 | 1.0825  | -1.0217     | C | 4.4276  | 1.0416      | 0.5881  | C | -4.4244 | 1.1738  | -0.7742 |
| C           | -5.2207 | -0.1813 | -1.1232     | C | 5.2616  | -0.2079     | 0.9239  | C | -5.2990 | -0.0547 | -1.0821 |
| C           | -4.3516 | -1.4469 | -1.0076     | C | 4.3430  | -1.4188     | 1.1690  | C | -4.4253 | -1.3137 | -1.2289 |
| C           | -3.4519 | -1.4389 | 0.2394      | C | 3.3462  | -1.6532     | 0.0216  | C | -3.4866 | -1.5301 | -0.0304 |
| C           | -2.5774 | -0.1738 | 0.2612      | C | 2.5169  | -0.3832     | -0.2350 | C | -2.6115 | -0.2856 | 0.1982  |
| C           | -2.1586 | -0.1501 | 2.8198      | C | 1.8916  | -0.9309     | -2.6908 | C | -2.1099 | -0.7424 | 2.6997  |
| C           | 0.4685  | 0.7598  | 0.1878      | C | -0.4684 | 0.7007      | -0.1619 | C | 0.4268  | 0.6656  | 0.2218  |
| C           | 1.7372  | 1.5694  | 0.2530      | C | -1.6498 | 1.6335      | -0.2180 | C | 1.6661  | 1.5194  | 0.2781  |
| C           | 2.4884  | 1.9015  | -0.8011     | C | -2.0677 | 2.3813      | 0.8097  | C | 2.2996  | 1.9800  | -0.8057 |
| C           | 3.8354  | 2.5639  | -0.6756     | C | -3.2673 | 3.2927      | 0.7705  | C | 3.6449  | 2.6589  | -0.7839 |
| C           | 4.0188  | 3.7527  | -1.6135     | C | -2.9096 | 4.7431      | 1.0801  | C | 3.6530  | 3.9851  | -1.5361 |
| C           | -0.7011 | 3.7421  | 0.9941      | C | 0.7564  | 3.3458      | -1.8026 | C | -0.7278 | 3.4470  | 1.5909  |
| C           | -6.0610 | -0.1863 | -2.4043     | C | 6.1999  | 0.0404      | 2.1093  | C | -6.1780 | 0.1723  | -2.3163 |
| C           | 0.8670  | -1.6024 | -0.8188     | C | -1.1197 | -1.3918     | 1.2466  | C | 1.1095  | -1.4741 | -1.0531 |
| C           | 0.7128  | -0.7557 | 0.4529      | C | -0.8537 | -0.8033     | -0.1447 | C | 0.7496  | -0.8554 | 0.3003  |
| C           | 1.9545  | -1.1312 | 1.2602      | C | -2.0816 | -1.2306     | -0.9312 | C | 1.9225  | -1.2587 | 1.1867  |
| C           | 2.6487  | -2.3126 | 0.5858      | C | -2.8419 | -2.2822     | -0.1304 | C | 2.7975  | -2.2602 | 0.4287  |
| C           | 4.1603  | -2.0793 | 0.3453      | C | -4.3554 | -1.9741     | -0.1340 | C | 4.2900  | -1.9136 | 0.5625  |
| C           | 2.2495  | -3.4663 | -1.6471     | C | -2.6134 | -3.0622     | 2.2871  | C | 2.7783  | -3.0204 | -2.0046 |
| H           | -0.1229 | 1.3705  | 2.1686      | H | -0.0362 | 0.8097      | -2.2714 | H | -0.1077 | 0.9065  | 2.2934  |
| H           | -3.2065 | 3.2781  | 0.1738      | H | 3.2882  | 2.9473      | -1.0419 | H | -3.2541 | 3.1182  | 0.7707  |
| H           | -4.1680 | 1.0132  | 1.1030      | H | 4.0783  | 0.4829      | -1.4402 | H | -4.1769 | 0.7114  | 1.2937  |
| H           | -4.9846 | 1.9770  | -1.0272     | H | 5.0936  | 1.8778      | 0.3372  | H | -5.0621 | 2.0493  | -0.5932 |
| H           | -3.6990 | 1.1538  | -1.9070     | H | 3.8549  | 1.3520      | 1.4742  | H | -3.8046 | 1.4137  | -1.6505 |
| H           | -5.9100 | -0.1729 | -0.2643     | H | 5.8807  | -0.4348     | 0.0418  | H | -5.9617 | -0.2103 | -0.2163 |
| H           | -4.9930 | -2.3373 | -0.9977     | H | 4.9504  | -2.3198     | 1.3225  | H | -5.0649 | -2.1953 | -1.3633 |
| H           | -3.7197 | -1.5288 | -1.9040     | H | 3.7839  | -1.2588     | 2.1025  | H | -3.8231 | -1.2247 | -2.1449 |
| H           | -2.8299 | -2.3395 | 0.2510      | H | 2.6954  | -2.4987     | 0.2652  | H | -2.8650 | -2.4140 | -0.2029 |
| H           | -4.0779 | -1.4773 | 1.1404      | H | 3.8960  | -1.9307     | -0.8872 | H | -4.0846 | -1.7362 | 0.8669  |
| H           | -2.0087 | -0.1695 | -0.6791     | H | 2.0299  | -0.1297     | 0.7170  | H | -2.0750 | -0.1021 | -0.7436 |
| H           | 0.0558  | 0.8208  | -0.8245     | H | 0.0622  | 0.8751      | 0.7798  | H | -0.0468 | 0.8070  | -0.7554 |
| H           | 2.0885  | 1.8314  | 1.2501      | H | -2.1956 | 1.6720      | -1.1602 | H | 2.1006  | 1.6893  | 1.2631  |
| H           | 2.1689  | 1.6366  | -1.8109     | H | -1.5361 | 2.3481      | 1.7621  | H | 1.8832  | 1.7981  | -1.7979 |
| H           | 3.9805  | 2.8855  | 0.3610      | H | -3.7237 | 3.2411      | -0.2307 | H | 3.9326  | 2.8429  | 0.2650  |
| H           | 2.5461  | -3.1841 | 1.2507      | H | -2.6910 | -3.2687     | -0.5941 | H | 2.6491  | -3.2616 | 0.8645  |
| H           | 4.5941  | -1.7376 | 1.2946      | H | -4.8726 | -2.6662     | 0.5367  | H | 4.6152  | -2.2095 | 1.5660  |
| H           | 4.6201  | -3.0439 | 0.1042      | H | -4.5159 | -0.9536     | 0.2484  | H | 4.8705  | -2.4938 | -0.1593 |
| H           | 4.4602  | -0.2780 | -0.4385     | H | -4.4013 | -1.5814     | -2.0231 | H | 4.3642  | -0.0502 | 1.1325  |
| H           | -2.8513 | 0.6813  | 2.9746      | H | 2.6003  | -0.1969     | -3.0833 | H | -2.8000 | 0.0387  | 3.0298  |
| H           | -2.7005 | -1.0870 | 2.9681      | H | 2.3850  | -1.9048     | -2.6508 | H | -2.6445 | -1.6950 | 2.6830  |
| H           | -1.3856 | -0.0887 | 3.5929      | H | 1.0622  | -1.0071     | -3.4016 | H | -1.3134 | -0.8211 | 3.4470  |
| H           | 3.8805  | 3.4503  | -2.6590     | H | -2.4271 | 4.8187      | 2.0604  | H | 3.3452  | 3.8365  | -2.5767 |
| H           | 5.0228  | 4.1744  | -1.5050     | H | -3.8159 | 5.3568      | 1.0951  | H | 4.6610  | 4.4123  | -1.5351 |
| H           | 3.2864  | 4.5361  | -1.3926     | H | -2.2288 | 5.1458      | 0.3243  | H | 2.9696  | 4.7013  | -1.0693 |
| H           | -1.3568 | 4.5795  | 0.7371      | H | 1.4706  | 4.1746      | -1.8148 | H | -1.3976 | 4.3094  | 1.5213  |
| H           | -0.3569 | 3.8835  | 2.0274      | H | 0.3482  | 3.2336      | -2.8160 | H | -0.3459 | 3.3945  | 2.6192  |
| H           | 0.1905  | 3.8031  | 0.3590      | H | -0.0831 | 3.6304      | -1.1590 | H | 0.1381  | 3.6387  | 0.9464  |
| H           | -5.4214 | -0.1939 | -3.2956     | H | 5.6330  | 0.2739      | 3.0191  | H | -5.5659 | 0.3350  | -3.2120 |
| H           | -6.7039 | 0.6996  | -2.4651     | H | 6.8763  | 0.8809      | 1.9153  | H | -6.8237 | 1.0495  | -2.1922 |
| H           | -6.7073 | -1.0703 | -2.4533     | H | 6.8165  | -0.8409     | 2.3208  | H | -6.8243 | -0.6918 | -2.5096 |
| H           | 3.1909  | -3.1872 | -2.1312     | H | -3.5978 | -2.7783     | 2.6727  | H | 3.7734  | -2.6804 | -2.3086 |
| H           | 2.3578  | -4.4564 | -1.1924     | H | -2.6463 | -4.1087     | 1.9654  | H | 2.8396  | -4.0707 | -1.6978 |
| H           | 1.4580  | -3.4982 | -2.3963     | H | -1.8773 | -2.9512     | 3.0836  | H | 2.0999  | -2.9306 | -2.8532 |
| H           | 4.9083  | 1.3892  | -1.8434     | H | -4.4447 | 1.9704      | 1.6037  | H | 4.5749  | 0.9457  | -0.9881 |
| N           | 1.8785  | -2.4907 | -0.6380     | N | -2.2086 | -2.2099     | 1.1804  | N | 2.2509  | -2.2071 | -0.9223 |
| O           | -0.6665 | -2.3712 | 1.6549      | O | 0.4432  | -2.7389     | -0.8848 | O | -0.6774 | -2.6942 | 1.0281  |
| O           | 4.8842  | 1.5840  | -0.8925     | O | -4.2249 | 2.8992      | 1.7679  | O | 4.6133  | 1.8162  | -1.4230 |
| O           | 2.3456  | -0.5994 | 2.2774      | O | -2.4420 | -0.8013     | -2.0127 | O | 2.1678  | -0.8498 | 2.3032  |
| O           | 0.1593  | -1.5023 | -1.8172     | O | -0.4387 | -1.1726     | 2.2409  | O | 0.4633  | -1.3215 | -2.0835 |
| O           | 4.4283  | -1.2085 | -0.7298     | O | -4.9034 | -2.1586     | -1.4238 | O | 4.5828  | -0.5383 | 0.3255  |

**Table S10.** Cartesian coordinates of the six lowest-energy conformers of the 3'R,5'R stereoisomer of pyrenosetins F at the B3LYP/TZVP/SMD(CHCl<sub>3</sub>)/B3LYP/6-31+G(d,p)/SMD(CHCl<sub>3</sub>) level.

|   | Conformer 1 |         |         |   | Conformer 2 |         |         |   | Conformer 3 |         |         |
|---|-------------|---------|---------|---|-------------|---------|---------|---|-------------|---------|---------|
| C | 0.3840      | -1.4239 | -0.9371 | C | -0.4042     | -1.3530 | 1.0723  | C | 0.3873      | -1.4767 | -0.8976 |
| C | 1.3948      | -0.3426 | -1.3064 | C | -1.3941     | -0.2305 | 1.3584  | C | 1.4035      | -0.4127 | -1.3008 |
| C | 0.5632      | 0.9701  | -1.2263 | C | -0.5318     | 1.0528  | 1.1978  | C | 0.5692      | 0.9005  | -1.2950 |
| C | 1.3984      | 2.2245  | -1.0563 | C | -1.3376     | 2.3123  | 0.9431  | C | 1.4000      | 2.1632  | -1.1744 |
| C | 2.6866      | 2.1595  | -0.6895 | C | -2.6235     | 2.2515  | 0.5679  | C | 2.6807      | 2.1190  | -0.7791 |
| C | 3.4451      | 0.8914  | -0.4054 | C | -3.4064     | 0.9839  | 0.3555  | C | 3.4354      | 0.8675  | -0.4200 |
| C | 4.3962      | 1.0243  | 0.8023  | C | -4.3410     | 1.0590  | -0.8699 | C | 4.3611      | 1.0582  | 0.7997  |
| C | 5.2373      | -0.2469 | 1.0168  | C | -5.2061     | -0.2062 | -1.0129 | C | 5.2010      | -0.1988 | 1.0892  |
| C | 4.3263      | -1.4838 | 1.1175  | C | -4.3207     | -1.4656 | -1.0237 | C | 4.2923      | -1.4341 | 1.2252  |
| C | 3.3516      | -1.6032 | -0.0659 | C | -3.3612     | -1.5291 | 0.1765  | C | 3.3423      | -1.6094 | 0.0288  |
| C | 2.5135      | -0.3205 | -0.2039 | C | -2.4990     | -0.2570 | 0.2420  | C | 2.5031      | -0.3372 | -0.1818 |
| C | 1.9433      | -0.6102 | -2.7169 | C | -1.9635     | -0.3900 | 2.7761  | C | 1.9756      | -0.7444 | -2.6879 |
| C | -0.4940     | 0.7152  | -0.0929 | C | 0.5253      | 0.7107  | 0.0867  | C | -0.5014     | 0.6973  | -0.1630 |
| C | -1.6902     | 1.6216  | -0.0979 | C | 1.7537      | 1.5749  | 0.0928  | C | -1.6886     | 1.6108  | -0.2206 |
| C | -2.1273     | 2.2923  | 0.9808  | C | 2.2771      | 2.1516  | -1.0013 | C | -2.1333     | 2.3428  | 0.8133  |
| C | -3.3263     | 3.1630  | 1.0163  | C | 3.4979      | 2.9922  | -1.0159 | C | -3.3289     | 3.2216  | 0.6924  |
| C | -4.1570     | 3.3465  | -0.2376 | C | 4.2489      | 3.2475  | 0.2767  | C | -3.7410     | 3.9664  | 1.9433  |
| C | 0.7360      | 3.5398  | -1.3825 | C | -0.6476     | 3.6311  | 1.1873  | C | 0.7438      | 3.4574  | -1.5860 |
| C | 6.1562      | -0.1186 | 2.2358  | C | -6.1085     | -0.1376 | -2.2492 | C | 6.0923      | -0.0127 | 2.3213  |
| C | -1.2322     | -1.5187 | 1.0086  | C | 1.0648      | -1.6085 | -0.9578 | C | -1.2545     | -1.4850 | 1.0260  |
| C | -0.8706     | -0.7781 | -0.2675 | C | 0.8399      | -0.7948 | 0.3102  | C | -0.8766     | -0.8022 | -0.2762 |
| C | -2.0593     | -1.1033 | -1.1906 | C | 2.0638      | -1.1404 | 1.1697  | C | -2.0536     | -1.1696 | -1.1996 |
| C | -2.3236     | -2.5401 | 0.6923  | C | 2.2180      | -2.5859 | -0.7238 | C | -2.3339     | -2.5273 | 0.7393  |
| C | -3.4203     | -2.5755 | 1.7669  | C | 3.2439      | -2.5273 | -1.8643 | C | -3.4243     | -2.5473 | 1.8197  |
| C | -3.9071     | -2.7309 | -1.2984 | C | 3.8319      | -2.8615 | 1.2309  | C | -3.9085     | -2.7925 | -1.2506 |
| H | -0.0041     | 1.0591  | -2.1627 | H | 0.0330      | 1.1880  | 2.1307  | H | 0.0126      | 0.9434  | -2.2407 |
| H | 3.2591      | 3.0852  | -0.6224 | H | -3.1747     | 3.1831  | 0.4350  | H | 3.2518      | 3.0476  | -0.7483 |
| H | 4.0852      | 0.6852  | -1.2801 | H | -4.0607     | 0.8476  | 1.2335  | H | 4.0941      | 0.6234  | -1.2709 |
| H | 5.0576      | 1.8879  | 0.6534  | H | -4.9858     | 1.9436  | -0.7850 | H | 5.0233      | 1.9166  | 0.6258  |
| H | 3.8067      | 1.2338  | 1.7068  | H | -3.7370     | 1.1975  | -1.7785 | H | 3.7523      | 1.3063  | 1.6815  |
| H | 5.8707      | -0.3743 | 0.1250  | H | -5.8522     | -0.2630 | -0.1228 | H | 5.8545      | -0.3632 | 0.2183  |
| H | 4.9393      | -2.3914 | 1.1858  | H | -4.9522     | -2.3629 | -1.0417 | H | 4.9069      | -2.3351 | 1.3458  |
| H | 2.7060      | -2.4761 | 0.0725  | H | -2.7316     | -2.4214 | 0.1000  | H | 2.6967      | -2.4780 | 0.1922  |
| H | 3.9202      | -1.7773 | -0.9885 | H | -3.9425     | -1.6339 | 1.1017  | H | 3.9301      | -1.8214 | -0.8736 |
| H | 2.0051      | -0.1696 | 0.7597  | H | -1.9769     | -0.1795 | -0.7225 | H | 1.9781      | -0.1454 | 0.7655  |
| H | 0.0019      | 0.7973  | 0.8800  | H | 0.0468      | 0.7837  | -0.8952 | H | -0.0133     | 0.8186  | 0.8099  |
| H | -1.5954     | 2.2262  | 1.9286  | H | 1.8076      | 2.0270  | -1.9752 | H | -1.6225     | 2.3180  | 1.7741  |
| H | -2.2312     | 1.6905  | -1.0386 | H | 2.2402      | 1.6984  | 1.0574  | H | -2.2358     | 1.6609  | -1.1598 |
| H | -1.8608     | -3.5384 | 0.6390  | H | 1.8129      | -3.6073 | -0.6584 | H | -1.8587     | -3.5213 | 0.7137  |
| H | 3.7511      | -1.4268 | 2.0535  | H | -3.7339     | -1.4803 | -1.9539 | H | 3.6979      | -1.3390 | 2.1460  |
| H | -4.1595     | -3.3380 | 1.5049  | H | 4.0311      | -3.2753 | -1.6958 | H | -4.1742     | -3.3018 | 1.5654  |
| H | -2.9495     | -2.8800 | 2.7104  | H | 2.7270      | -2.7893 | -2.7916 | H | -2.9496     | -2.8562 | 2.7602  |
| H | -3.5658     | -0.7317 | 2.3852  | H | 4.3034      | -1.0084 | -1.2598 | H | -3.5282     | -0.6942 | 2.4088  |
| H | 2.4510      | -1.5761 | -2.7691 | H | -2.4914     | -1.3400 | 2.8871  | H | 2.4847      | -1.7110 | -2.6869 |
| H | 1.1265      | -0.6232 | -3.4457 | H | -1.1553     | -0.3706 | 3.5143  | H | 1.1711      | -0.7918 | -3.4288 |
| H | 2.6467      | 0.1710  | -3.0167 | H | -2.6541     | 0.4231  | 3.0145  | H | 2.6835      | 0.0231  | -3.0116 |
| H | -4.5354     | 2.3849  | -0.6007 | H | 3.6152      | 3.7793  | 0.9950  | H | -3.9421     | 3.2601  | 2.7580  |
| H | -3.5575     | 3.7859  | -1.0425 | H | 5.1316      | 3.8516  | 0.0611  | H | -4.6314     | 4.5666  | 1.7494  |
| H | -4.9976     | 4.0052  | -0.0140 | H | 4.5567      | 2.3083  | 0.7487  | H | -2.9250     | 4.6166  | 2.2819  |
| H | -0.1158     | 3.7441  | -0.7240 | H | -1.3320     | 4.4708  | 1.0348  | H | 1.4393      | 4.2982  | -1.5059 |
| H | 1.4398      | 4.3721  | -1.2889 | H | -0.2612     | 3.6891  | 2.2137  | H | 0.3915      | 3.4046  | -2.6247 |
| H | 0.3447      | 3.5387  | -2.4086 | H | 0.2116      | 3.7725  | 0.5217  | H | -0.1354     | 3.6859  | -0.9735 |
| H | 6.8272      | 0.7431  | 2.1422  | H | -6.7611     | 0.7426  | -2.2200 | H | 6.7138      | -0.8976 | 2.5007  |
| H | 6.7783      | -1.0124 | 2.3613  | H | -6.7488     | -1.0241 | -2.3245 | H | 5.4900      | 0.1572  | 3.2225  |
| H | 5.5748      | 0.0122  | 3.1569  | H | -5.5138     | -0.0793 | -3.1692 | H | 6.7628      | 0.8465  | 2.2040  |
| H | -3.9511     | -2.3441 | -2.3166 | H | 3.9823      | -2.4072 | 2.2103  | H | -4.8507     | -2.5555 | -0.7466 |
| H | -3.7775     | -3.8179 | -1.3286 | H | 3.5732      | -3.9188 | 1.3568  | H | -3.9552     | -2.4307 | -2.2778 |
| H | -4.8457     | -2.4957 | -0.7863 | H | 4.7634      | -2.7942 | 0.6597  | H | -3.7660     | -3.8786 | -1.2543 |
| N | -2.7785     | -2.1092 | -0.6277 | N | 2.7496      | -2.1530 | 0.5667  | N | -2.7897     | -2.1393 | -0.5937 |
| O | 0.4848      | -2.6149 | -1.1403 | O | -0.5126     | -2.5184 | 1.3886  | O | 0.4916      | -2.6758 | -1.0439 |
| O | -3.6317     | 3.7227  | 2.0658  | O | 3.8848      | 3.4761  | -2.0756 | O | -3.9466     | 3.3406  | -0.3601 |
| O | -0.7722     | -1.3145 | 2.1120  | O | 0.4413      | -1.5072 | -1.9906 | O | -0.8182     | -1.2236 | 2.1275  |
| O | -2.2791     | -0.5690 | -2.2740 | O | 2.3433      | -0.6201 | 2.2451  | O | -2.2513     | -0.6937 | -2.3128 |
| O | -4.1198     | -1.3486 | 1.8850  | O | 3.7757      | -1.2255 | -2.0423 | O | -4.1100     | -1.3133 | 1.9444  |

Table S10 (continued)

| Conformer 4 |         |         |         | Conformer 5 |         |         |         | Conformer 6 |         |         |         |
|-------------|---------|---------|---------|-------------|---------|---------|---------|-------------|---------|---------|---------|
| C           | 0.4189  | -1.4745 | -0.9060 | C           | 0.4557  | -1.4889 | -0.8865 | C           | 0.3269  | -1.1845 | -1.2234 |
| C           | 1.4232  | -0.3973 | -1.3035 | C           | 1.4465  | -0.4033 | -1.2953 | C           | 1.3514  | -0.0712 | -1.4045 |
| C           | 0.5731  | 0.9051  | -1.2911 | C           | 0.5801  | 0.8882  | -1.3008 | C           | 0.5320  | 1.2196  | -1.1214 |
| C           | 1.3869  | 2.1776  | -1.1594 | C           | 1.3742  | 2.1736  | -1.1725 | C           | 1.3782  | 2.4211  | -0.7464 |
| C           | 2.6678  | 2.1472  | -0.7636 | C           | 2.6550  | 2.1644  | -0.7756 | C           | 2.6592  | 2.2816  | -0.3754 |
| C           | 3.4378  | 0.9027  | -0.4127 | C           | 3.4423  | 0.9332  | -0.4166 | C           | 3.3992  | 0.9744  | -0.2853 |
| C           | 4.3607  | 1.0975  | 0.8085  | C           | 4.3638  | 1.1515  | 0.8017  | C           | 4.3275  | 0.8980  | 0.9450  |
| C           | 5.2153  | -0.1511 | 1.0914  | C           | 5.2348  | -0.0830 | 1.0959  | C           | 5.1522  | -0.4016 | 0.9654  |
| C           | 4.3209  | -1.3976 | 1.2205  | C           | 4.3564  | -1.3392 | 1.2391  | C           | 4.2287  | -1.6278 | 0.8453  |
| C           | 3.3739  | -1.5776 | 0.0225  | C           | 3.4108  | -1.5435 | 0.0439  | C           | 3.2757  | -1.5404 | -0.3583 |
| C           | 2.5198  | -0.3145 | -0.1822 | C           | 2.5405  | -0.2937 | -0.1737 | C           | 2.4524  | -0.2424 | -0.2971 |
| C           | 2.0012  | -0.7148 | -2.6912 | C           | 2.0303  | -0.7300 | -2.6786 | C           | 1.9178  | -0.1140 | -2.8317 |
| C           | -0.4988 | 0.6849  | -0.1643 | C           | -0.4960 | 0.6688  | -0.1808 | C           | -0.5353 | 0.8066  | -0.0461 |
| C           | -1.7016 | 1.5775  | -0.2325 | C           | -1.7178 | 1.5338  | -0.2728 | C           | -1.7331 | 1.7073  | 0.0528  |
| C           | -2.1990 | 2.2602  | 0.8103  | C           | -2.2814 | 2.1595  | 0.7719  | C           | -2.2164 | 2.1896  | 1.2092  |
| C           | -3.4171 | 3.1044  | 0.6820  | C           | -3.5335 | 2.9510  | 0.6288  | C           | -3.4177 | 3.0485  | 1.3390  |
| C           | -3.9095 | 3.7632  | 1.9522  | C           | -4.1109 | 3.5188  | 1.9060  | C           | -4.1819 | 3.4628  | 0.0973  |
| C           | 0.7114  | 3.4669  | -1.5548 | C           | 0.6763  | 3.4514  | -1.5659 | C           | 0.7330  | 3.7792  | -0.8656 |
| C           | 6.1043  | 0.0390  | 2.3245  | C           | 6.1228  | 0.1310  | 2.3258  | C           | 6.0456  | -0.4850 | 2.2071  |
| C           | -1.1974 | -1.5114 | 1.0334  | C           | -1.1710 | -1.5071 | 1.0585  | C           | -1.2078 | -1.5736 | 0.7432  |
| C           | -0.8503 | -0.8223 | -0.2772 | C           | -0.8254 | -0.8479 | -0.2692 | C           | -0.9086 | -0.6520 | -0.4243 |
| C           | -2.0296 | -1.1993 | -1.1894 | C           | -1.9943 | -1.2524 | -1.1795 | C           | -2.1314 | -0.8531 | -1.3365 |
| C           | -2.3368 | -2.5026 | 0.7827  | C           | -2.3787 | -2.4256 | 0.8647  | C           | -2.3464 | -2.5105 | 0.3609  |
| C           | -3.4310 | -2.3991 | 1.8416  | C           | -3.4742 | -2.1424 | 1.9035  | C           | -3.3763 | -2.6214 | 1.5062  |
| C           | -3.9179 | -2.7829 | -1.1959 | C           | -3.8590 | -2.8696 | -1.1635 | C           | -3.9775 | -2.4702 | -1.5994 |
| H           | 0.0187  | 0.9472  | -2.2384 | H           | 0.0333  | 0.9151  | -2.2531 | H           | -0.0267 | 1.4625  | -2.0359 |
| H           | 3.2261  | 3.0833  | -0.7231 | H           | 3.1982  | 3.1094  | -0.7366 | H           | 3.2398  | 3.1773  | -0.1520 |
| H           | 4.0997  | 0.6716  | -1.2648 | H           | 4.1061  | 0.7033  | -1.2675 | H           | 4.0545  | 0.9034  | -1.1701 |
| H           | 5.0126  | 1.9647  | 0.6398  | H           | 5.0042  | 2.0256  | 0.6238  | H           | 4.9998  | 1.7660  | 0.9505  |
| H           | 3.7484  | 1.3332  | 1.6914  | H           | 3.7494  | 1.3878  | 1.6829  | H           | 3.7219  | 0.9652  | 1.8606  |
| H           | 5.8708  | -0.3031 | 0.2196  | H           | 5.8911  | -0.2355 | 0.2249  | H           | 5.8037  | -0.3897 | 0.0776  |
| H           | 4.9460  | -2.2919 | 1.3370  | H           | 4.9928  | -2.2244 | 1.3640  | H           | 4.8325  | -2.5412 | 0.7748  |
| H           | 2.7381  | -2.4542 | 0.1811  | H           | 2.7863  | -2.4263 | 0.2123  | H           | 2.6198  | -2.4166 | -0.3753 |
| H           | 3.9648  | -1.7783 | -0.8805 | H           | 4.0037  | -1.7461 | -0.8574 | H           | 3.8594  | -1.5677 | -1.2874 |
| H           | 1.9903  | -0.1354 | 0.7649  | H           | 2.0074  | -0.1120 | 0.7709  | H           | 1.9305  | -0.2454 | 0.6708  |
| H           | -0.0188 | 0.8143  | 0.8116  | H           | -0.0273 | 0.8210  | 0.7974  | H           | -0.0513 | 0.7576  | 0.9345  |
| H           | -1.7253 | 2.2064  | 1.7884  | H           | -1.8469 | 2.0844  | 1.7663  | H           | -1.7271 | 1.9606  | 2.1544  |
| H           | -2.2193 | 1.6461  | -1.1870 | H           | -2.1983 | 1.6198  | -1.2457 | H           | -2.2355 | 1.9340  | -0.8845 |
| H           | -1.9235 | -3.5225 | 0.8141  | H           | -2.0535 | -3.4722 | 0.9674  | H           | -1.9399 | -3.5139 | 0.1647  |
| H           | 3.7246  | -1.3140 | 2.1411  | H           | 3.7599  | -1.2536 | 2.1593  | H           | 3.6358  | -1.7184 | 1.7674  |
| H           | -4.1853 | -3.1810 | 1.6731  | H           | -4.3050 | -2.8486 | 1.7669  | H           | -3.7342 | -1.6146 | 1.7705  |
| H           | -2.9593 | -2.5913 | 2.8153  | H           | -3.0478 | -2.3153 | 2.8955  | H           | -4.2373 | -3.2052 | 1.1683  |
| H           | -4.6254 | -1.0037 | 2.4904  | H           | -4.3402 | -0.6383 | 1.0173  | H           | -2.0433 | -2.7947 | 2.8917  |
| H           | 1.1983  | -0.7681 | -3.4335 | H           | 2.7192  | 0.0530  | -3.0066 | H           | 2.4190  | -1.0637 | -3.0318 |
| H           | 2.7006  | 0.0624  | -3.0105 | H           | 2.5640  | -1.6832 | -2.6698 | H           | 1.1116  | -0.0018 | -3.5637 |
| H           | 2.5215  | -1.6755 | -2.6945 | H           | 1.2289  | -0.8034 | -3.4207 | H           | 2.6312  | 0.6984  | -2.9927 |
| H           | -4.1196 | 3.0042  | 2.7154  | H           | -5.0222 | 4.0804  | 1.6941  | H           | -4.5302 | 2.5872  | -0.4610 |
| H           | -4.8112 | 4.3444  | 1.7521  | H           | -3.3791 | 4.1716  | 2.3970  | H           | -3.5434 | 4.0453  | -0.5760 |
| H           | -3.1322 | 4.4190  | 2.3633  | H           | -4.3313 | 2.7054  | 2.6084  | H           | -5.0398 | 4.0685  | 0.3933  |
| H           | 1.3958  | 4.3163  | -1.4694 | H           | 1.3484  | 4.3112  | -1.4870 | H           | -0.1268 | 3.8842  | -0.1941 |
| H           | 0.3539  | 3.4203  | -2.5919 | H           | 0.3109  | 3.3980  | -2.6000 | H           | 1.4426  | 4.5777  | -0.6296 |
| H           | -0.1674 | 3.6768  | -0.9347 | H           | -0.2002 | 3.6498  | -0.9383 | H           | 0.3571  | 3.9480  | -1.8836 |
| H           | 6.7646  | 0.9067  | 2.2119  | H           | 5.5177  | 0.2899  | 3.2270  | H           | 6.7264  | 0.3720  | 2.2685  |
| H           | 6.7362  | -0.8394 | 2.4993  | H           | 6.7716  | 1.0061  | 2.2036  | H           | 6.6565  | -1.3951 | 2.1979  |
| H           | 5.5000  | 0.1969  | 3.2265  | H           | 6.7664  | -0.7373 | 2.5083  | H           | 5.4454  | -0.4982 | 3.1254  |
| H           | -4.8450 | -2.4788 | -0.6991 | H           | -3.6663 | -3.9474 | -1.1205 | H           | -3.8027 | -3.5347 | -1.7888 |
| H           | -3.9518 | -2.4611 | -2.2369 | H           | -4.8260 | -2.6657 | -0.6921 | H           | -4.9159 | -2.3565 | -1.0481 |
| H           | -3.8282 | -3.8736 | -1.1557 | H           | -3.8987 | -2.5499 | -2.2049 | H           | -4.0586 | -1.9422 | -2.5497 |
| N           | -2.7668 | -2.1587 | -0.5691 | N           | -2.7853 | -2.1390 | -0.5089 | N           | -2.8593 | -1.9020 | -0.8627 |
| O           | 0.5375  | -2.6718 | -1.0595 | O           | 0.5896  | -2.6861 | -1.0246 | O           | 0.4013  | -2.3207 | -1.6377 |
| O           | -3.9939 | 3.2623  | -0.3887 | O           | -4.0757 | 3.1244  | -0.4580 | O           | -3.7778 | 3.4136  | 2.4545  |
| O           | -0.6695 | -1.3163 | 2.1058  | O           | -0.5972 | -1.3321 | 2.1105  | O           | -0.6708 | -1.5447 | 1.8348  |
| O           | -2.2296 | -0.7412 | -2.3102 | O           | -2.1546 | -0.8737 | -2.3347 | O           | -2.3741 | -0.1983 | -2.3448 |
| O           | -3.9929 | -1.0978 | 1.7642  | O           | -3.9126 | -0.7942 | 1.8723  | O           | -2.8216 | -3.3049 | 2.6127  |



**Table S11.** Cartesian coordinates of the six lowest-energy conformers of the 3'S,5'R stereoisomer of pyrenosetins F at the B3LYP/TZVP/SMD(CHCl<sub>3</sub>)/B3LYP/6-31+G(d,p)/SMD(CHCl<sub>3</sub>) level

|   | Conformer 1 |         |         |   | Conformer 2 |         |         |   | Conformer 3 |         |         |
|---|-------------|---------|---------|---|-------------|---------|---------|---|-------------|---------|---------|
| C | 0.1944      | -1.3147 | -0.8536 | C | 0.1452      | -1.3537 | -0.8089 | C | 0.1868      | -1.1975 | -1.0020 |
| C | 1.2177      | -0.2857 | -1.3039 | C | 1.2492      | -0.4178 | -1.2878 | C | 1.1858      | -0.1129 | -1.3612 |
| C | 0.4053      | 1.0420  | -1.2917 | C | 0.5597      | 0.9767  | -1.2901 | C | 0.3512      | 1.1905  | -1.2061 |
| C | 1.2616      | 2.2913  | -1.2147 | C | 1.5227      | 2.1470  | -1.2367 | C | 1.1890      | 2.4416  | -1.0220 |
| C | 2.5512      | 2.2287  | -0.8523 | C | 2.8058      | 1.9761  | -0.8866 | C | 2.4842      | 2.3662  | -0.6834 |
| C | 3.2929      | 0.9687  | -0.4955 | C | 3.4372      | 0.6604  | -0.5193 | C | 3.2488      | 1.0905  | -0.4534 |
| C | 4.2555      | 1.1589  | 0.6954  | C | 4.4263      | 0.7821  | 0.6586  | C | 4.2178      | 1.1829  | 0.7439  |
| C | 5.0804      | -0.1098 | 0.9775  | C | 5.1409      | -0.5495 | 0.9512  | C | 5.0638      | -0.0939 | 0.8991  |
| C | 4.1538      | -1.3261 | 1.1575  | C | 4.1135      | -1.6773 | 1.1576  | C | 4.1574      | -1.3365 | 0.9695  |
| C | 3.1667      | -1.5010 | -0.0085 | C | 3.1018      | -1.7806 | 0.0040  | C | 3.1631      | -1.4163 | -0.2012 |
| C | 2.3473      | -0.2153 | -0.2124 | C | 2.3937      | -0.4318 | -0.2110 | C | 2.3239      | -0.1296 | -0.2759 |
| C | 1.7495      | -0.6443 | -2.6997 | C | 1.7295      | -0.8455 | -2.6830 | C | 1.7093      | -0.3211 | -2.7894 |
| C | -0.6253     | 0.8805  | -0.1204 | C | -0.4762     | 0.9210  | -0.1128 | C | -0.6577     | 0.9049  | -0.0384 |
| C | -1.8146     | 1.7928  | -0.1694 | C | -1.5635     | 1.9527  | -0.1523 | C | -1.8851     | 1.7710  | -0.0315 |
| C | -2.2647     | 2.5057  | 0.8748  | C | -1.9242     | 2.7128  | 0.8935  | C | -2.3690     | 2.3798  | 1.0632  |
| C | -3.4710     | 3.3723  | 0.7681  | C | -3.0304     | 3.7042  | 0.7947  | C | -3.5967     | 3.2105  | 1.1041  |
| C | -3.8748     | 4.1127  | 2.0232  | C | -3.3263     | 4.5018  | 2.0452  | C | -4.3944     | 3.4346  | -0.1652 |
| C | 0.6135      | 3.5914  | -1.6197 | C | 0.9891      | 3.4943  | -1.6547 | C | 0.5142      | 3.7642  | -1.2860 |
| C | 6.0107      | 0.0763  | 2.1805  | C | 6.0968      | -0.4284 | 2.1423  | C | 6.0002      | -0.0072 | 2.1085  |
| C | -2.2546     | -1.0306 | -0.9470 | C | -2.2684     | -0.8074 | -0.9782 | C | -2.2814     | -1.0189 | -0.8561 |
| C | -1.0056     | -0.6293 | -0.1539 | C | -1.0088     | -0.5387 | -0.1516 | C | -0.9775     | -0.6173 | -0.1596 |
| C | -1.2788     | -1.2221 | 1.2378  | C | -1.3699     | -1.1119 | 1.2226  | C | -1.0871     | -1.3270 | 1.2023  |
| C | -3.0822     | -2.0005 | -0.1058 | C | -3.1828     | -1.7415 | -0.1878 | C | -2.9791     | -2.0915 | -0.0218 |
| C | -3.1467     | -3.4294 | -0.7128 | C | -3.3282     | -3.1039 | -0.9000 | C | -3.0513     | -3.4705 | -0.7343 |
| C | -2.9356     | -2.6849 | 2.3369  | C | -3.1805     | -2.3913 | 2.2903  | C | -2.5595     | -2.9533 | 2.3322  |
| H | -0.1783     | 1.0817  | -2.2223 | H | -0.0250     | 1.0561  | -2.2172 | H | -0.2481     | 1.3087  | -2.1205 |
| H | 3.1386      | 3.1476  | -0.8475 | H | 3.4718      | 2.8396  | -0.9010 | H | 3.0569      | 3.2902  | -0.5970 |
| H | 3.9229      | 0.7009  | -1.3608 | H | 4.0314      | 0.3262  | -1.3868 | H | 3.8759      | 0.9157  | -1.3443 |
| H | 4.9276      | 2.0028  | 0.4909  | H | 5.1669      | 1.5614  | 0.4356  | H | 4.8757      | 2.0526  | 0.6157  |
| H | 3.6761      | 1.4290  | 1.5903  | H | 3.8828      | 1.1137  | 1.5554  | H | 3.6414      | 1.3581  | 1.6639  |
| H | 5.7051      | -0.2976 | 0.0902  | H | 5.7371      | -0.8033 | 0.0608  | H | 5.6843      | -0.1869 | -0.0060 |
| H | 4.7553      | -2.2366 | 1.2731  | H | 4.6343      | -2.6353 | 1.2810  | H | 4.7736      | -2.2440 | 0.9948  |
| H | 2.5091      | -2.3532 | 0.1906  | H | 2.3753      | -2.5701 | 0.2193  | H | 2.5195      | -2.2933 | -0.0771 |
| H | 3.7231      | -1.7396 | -0.9241 | H | 3.6259      | -2.0772 | -0.9139 | H | 3.7142      | -1.5598 | -1.1395 |
| H | 1.8510      | -0.0053 | 0.7452  | H | 1.9277      | -0.1657 | 0.7484  | H | 1.8331      | -0.0200 | 0.7007  |
| H | -0.1067     | 1.0310  | 0.8316  | H | 0.0595      | 1.0136  | 0.8374  | H | -0.1386     | 1.0242  | 0.9172  |
| H | -1.7542     | 2.4688  | 1.8351  | H | -1.4100     | 2.6256  | 1.8485  | H | -1.8611     | 2.2855  | 2.0214  |
| H | -2.3611     | 1.8609  | -1.1085 | H | -2.1105     | 2.0754  | -1.0855 | H | -2.4061     | 1.8718  | -0.9808 |
| H | -4.1089     | -1.6112 | -0.0563 | H | -4.1820     | -1.2912 | -0.1125 | H | -4.0105     | -1.7571 | 0.1606  |
| H | 3.5871      | -1.2076 | 2.0926  | H | 3.5699      | -1.4964 | 2.0966  | H | 3.5957      | -1.3155 | 1.9147  |
| H | -3.9866     | -3.9638 | -0.2587 | H | -3.6924     | -2.9036 | -1.9129 | H | -3.8161     | -4.0779 | -0.2410 |
| H | -3.3705     | -3.3166 | -1.7850 | H | -2.3458     | -3.5839 | -0.9738 | H | -3.3930     | -3.2854 | -1.7646 |
| H | -1.2081     | -3.7194 | -0.7718 | H | -3.8227     | -4.4645 | 0.4068  | H | -1.1243     | -3.6611 | -1.0271 |
| H | 0.9269      | -0.6895 | -3.4207 | H | 0.9001      | -0.8153 | -3.3971 | H | 0.8807      | -0.3096 | -3.5048 |
| H | 2.4598      | 0.1088  | -3.0502 | H | 2.5109      | -0.1750 | -3.0502 | H | 2.4036      | 0.4752  | -3.0692 |
| H | 2.2450      | -1.6177 | -2.6992 | H | 2.1218      | -1.8651 | -2.6719 | H | 2.2210      | -1.2809 | -2.8898 |
| H | -4.0617     | 3.4029  | 2.8382  | H | -2.4370     | 5.0663  | 2.3514  | H | -3.7856     | 3.9376  | -0.9245 |
| H | -4.7710     | 4.7077  | 1.8401  | H | -3.5744     | 3.8286  | 2.8748  | H | -5.2638     | 4.0520  | 0.0659  |
| H | -3.0589     | 4.7665  | 2.3548  | H | -4.1548     | 5.1895  | 1.8687  | H | -4.7284     | 2.4833  | -0.5932 |
| H | 0.2271      | 3.5346  | -2.6460 | H | 1.7732      | 4.2570  | -1.6284 | H | 0.0988      | 3.7990  | -2.3020 |
| H | -0.2414     | 3.8405  | -0.9808 | H | 0.5844      | 3.4572  | -2.6747 | H | -0.3223     | 3.9404  | -0.5999 |
| H | 1.3243      | 4.4215  | -1.5703 | H | 0.1699      | 3.8304  | -1.0090 | H | 1.2167      | 4.5959  | -1.1785 |
| H | 5.4382      | 0.2686  | 3.0963  | H | 6.8478      | 0.3524  | 1.9750  | H | 6.6264      | -0.9030 | 2.1922  |
| H | 6.6929      | 0.9214  | 2.0319  | H | 6.6296      | -1.3693 | 2.3226  | H | 5.4316      | 0.0878  | 3.0418  |
| H | 6.6211      | -0.8176 | 2.3535  | H | 5.5531      | -0.1745 | 3.0607  | H | 6.6674      | 0.8596  | 2.0368  |
| H | -2.3542     | -2.3979 | 3.2132  | H | -4.2594     | -2.2219 | 2.2500  | H | -3.6026     | -2.7815 | 2.6170  |
| H | -3.9905     | -2.4451 | 2.5058  | H | -2.9933     | -3.4691 | 2.3491  | H | -2.4233     | -4.0082 | 2.0746  |
| H | -2.8316     | -3.7618 | 2.1719  | H | -2.7686     | -1.9229 | 3.1857  | H | -1.9097     | -2.7009 | 3.1702  |
| N | -2.4301     | -1.9441 | 1.1942  | N | -2.5453     | -1.7923 | 1.1259  | N | -2.2017     | -2.1047 | 1.2085  |
| O | 0.2556      | -2.5163 | -1.0533 | O | 0.1181      | -2.5613 | -0.9276 | O | 0.2431      | -2.3639 | -1.3538 |
| O | -4.1039     | 3.4802  | -0.2767 | O | -3.6667     | 3.8692  | -0.2407 | O | -3.9521     | 3.7050  | 2.1698  |
| O | -2.5372     | -0.6775 | -2.0709 | O | -2.5043     | -0.3909 | -2.0919 | O | -2.6979     | -0.5854 | -1.9083 |
| O | -0.5694     | -1.0427 | 2.2217  | O | -0.7016     | -0.9677 | 2.2408  | O | -0.2925     | -1.1872 | 2.1255  |
| O | -1.9971     | -4.2024 | -0.4640 | O | -4.2824     | -3.9420 | -0.2646 | O | -1.8519     | -4.2035 | -0.6707 |

Table S11 (continued)

|   | Conformer 4 |         |         |   | Conformer 5 |         |         |   | Conformer 6 |         |         |
|---|-------------|---------|---------|---|-------------|---------|---------|---|-------------|---------|---------|
| C | 0.1392      | -1.2804 | -0.9006 | C | 0.1949      | -1.4464 | -0.6662 | C | 0.1437      | -1.3468 | -0.8341 |
| C | 1.2370      | -0.3109 | -1.3206 | C | 1.2363      | -0.4954 | -1.2443 | C | 1.2501      | -0.4083 | -1.3011 |
| C | 0.5427      | 1.0770  | -1.2198 | C | 0.4840      | 0.8648  | -1.3044 | C | 0.5620      | 0.9866  | -1.2915 |
| C | 1.5042      | 2.2441  | -1.1013 | C | 1.3935      | 2.0772  | -1.3616 | C | 1.5273      | 2.1547  | -1.2291 |
| C | 2.7914      | 2.0537  | -0.7779 | C | 2.6953      | 1.9842  | -1.0539 | C | 2.8091      | 1.9788  | -0.8768 |
| C | 3.4285      | 0.7190  | -0.5012 | C | 3.3999      | 0.7228  | -0.6335 | C | 3.4371      | 0.6595  | -0.5168 |
| C | 4.4258      | 0.7674  | 0.6752  | C | 4.4269      | 0.9611  | 0.4932  | C | 4.4217      | 0.7702  | 0.6659  |
| C | 5.1442      | -0.5789 | 0.8770  | C | 5.2122      | -0.3172 | 0.8374  | C | 5.1329      | -0.5650 | 0.9505  |
| C | 4.1204      | -1.7200 | 1.0181  | C | 4.2465      | -1.4739 | 1.1530  | C | 4.1031      | -1.6930 | 1.1438  |
| C | 3.1002      | -1.7516 | -0.1325 | C | 3.1977      | -1.6932 | 0.0499  | C | 3.0955      | -1.7853 | -0.0145 |
| C | 2.3895      | -0.3929 | -0.2552 | C | 2.4207      | -0.3923 | -0.2165 | C | 2.3908      | -0.4334 | -0.2208 |
| C | 1.7090      | -0.6391 | -2.7450 | C | 1.6816      | -0.9880 | -2.6296 | C | 1.7341      | -0.8234 | -2.6987 |
| C | -0.4792     | 0.9411  | -0.0362 | C | -0.5028     | 0.8420  | -0.0848 | C | -0.4722     | 0.9235  | -0.1130 |
| C | -1.5809     | 1.9618  | -0.0158 | C | -1.6408     | 1.8161  | -0.1507 | C | -1.5608     | 1.9541  | -0.1484 |
| C | -1.9465     | 2.6474  | 1.0797  | C | -2.0049     | 2.6278  | 0.8540  | C | -1.9213     | 2.7115  | 0.8993  |
| C | -3.0473     | 3.6384  | 1.1396  | C | -3.1642     | 3.5541  | 0.7286  | C | -3.0280     | 3.7026  | 0.8033  |
| C | -3.8365     | 3.9613  | -0.1136 | C | -3.4644     | 4.4167  | 1.9337  | C | -3.3247     | 4.4962  | 2.0561  |
| C | 0.9640      | 3.6157  | -1.4205 | C | 0.7830      | 3.3711  | -1.8388 | C | 0.9972      | 3.5057  | -1.6395 |
| C | 6.1079      | -0.5322 | 2.0671  | C | 6.2050      | -0.0806 | 1.9800  | C | 6.0843      | -0.4551 | 2.1463  |
| C | -2.2884     | -0.7536 | -0.9262 | C | -2.2491     | -1.0084 | -0.7496 | C | -2.2705     | -0.8061 | -0.9623 |
| C | -0.9945     | -0.5217 | -0.1461 | C | -0.9680     | -0.6416 | -0.0066 | C | -1.0022     | -0.5372 | -0.1540 |
| C | -1.2795     | -1.1967 | 1.2009  | C | -1.2401     | -1.1330 | 1.4195  | C | -1.3377     | -1.1224 | 1.2224  |
| C | -3.1532     | -1.7524 | -0.1602 | C | -3.1531     | -1.8101 | 0.1775  | C | -3.1743     | -1.7425 | -0.1580 |
| C | -3.3414     | -3.0587 | -0.9604 | C | -3.4195     | -3.2139 | -0.4218 | C | -3.3523     | -3.0854 | -0.8753 |
| C | -2.9981     | -2.6153 | 2.2461  | C | -2.9912     | -2.3567 | 2.6587  | C | -3.1193     | -2.4466 | 2.2977  |
| H | -0.0533     | 1.2153  | -2.1332 | H | -0.1382     | 0.8603  | -2.2104 | H | -0.0234     | 1.0743  | -2.2175 |
| H | 3.4554      | 2.9182  | -0.7429 | H | 3.3201      | 2.8731  | -1.1477 | H | 3.4768      | 2.8412  | -0.8836 |
| H | 4.0172      | 0.4428  | -1.3926 | H | 3.9751      | 0.3616  | -1.5031 | H | 4.0343      | 0.3309  | -1.3845 |
| H | 5.1638      | 1.5607  | 0.4972  | H | 5.1221      | 1.7562  | 0.1927  | H | 5.1646      | 1.5500  | 0.4521  |
| H | 3.8880      | 1.0401  | 1.5949  | H | 3.9034      | 1.3248  | 1.3895  | H | 3.8752      | 1.0955  | 1.5632  |
| H | 5.7349      | -0.7741 | -0.0318 | H | 5.7862      | -0.5998 | -0.0590 | H | 5.7323      | -0.8125 | 0.0604  |
| H | 4.6440      | -2.6826 | 1.0761  | H | 4.8152      | -2.3986 | 1.3128  | H | 4.6220      | -2.6526 | 1.2613  |
| H | 2.3758      | -2.5540 | 0.0387  | H | 2.5169      | -2.4985 | 0.3426  | H | 2.3665      | -2.5750 | 0.1924  |
| H | 3.6173      | -1.9891 | -1.0713 | H | 3.6994      | -2.0233 | -0.8689 | H | 3.6222      | -2.0758 | -0.9327 |
| H | 1.9315      | -0.1898 | 0.7229  | H | 1.9810      | -0.0883 | 0.7438  | H | 1.9221      | -0.1749 | 0.7392  |
| H | 0.0634      | 0.9941  | 0.9127  | H | 0.0618      | 1.0225  | 0.8354  | H | 0.0647      | 1.0141  | 0.8365  |
| H | -1.4279     | 2.4979  | 2.0252  | H | -1.4551     | 2.6328  | 1.7930  | H | -1.4066     | 2.6223  | 1.8540  |
| H | -2.1116     | 2.1152  | -0.9528 | H | -2.2246     | 1.8494  | -1.0696 | H | -2.1086     | 2.0789  | -1.0809 |
| H | -4.1479     | -1.3142 | 0.0019  | H | -4.1210     | -1.2991 | 0.2797  | H | -4.1660     | -1.2788 | -0.0554 |
| H | 3.5832      | -1.6009 | 1.9704  | H | 3.7308      | -1.2592 | 2.1005  | H | 3.5561      | -1.5190 | 2.0820  |
| H | -3.7373     | -2.7839 | -1.9435 | H | -2.4583     | -3.7006 | -0.6412 | H | -3.6552     | -2.8723 | -1.9108 |
| H | -2.3691     | -3.5443 | -1.1021 | H | -3.9476     | -3.8253 | 0.3158  | H | -2.3903     | -3.6131 | -0.8953 |
| H | -3.8201     | -4.4853 | 0.2816  | H | -3.8201     | -2.5325 | -2.1923 | H | -4.3573     | -4.7206 | -0.5465 |
| H | 0.8733      | -0.5698 | -3.4491 | H | 2.4139      | -0.3063 | -3.0701 | H | 2.1255      | -1.8434 | -2.6958 |
| H | 2.4808      | 0.0621  | -3.0730 | H | 2.1237      | -1.9854 | -2.5726 | H | 0.9069      | -0.7860 | -3.4150 |
| H | 2.1108      | -1.6531 | -2.8057 | H | 0.8242      | -1.0419 | -3.3084 | H | 2.5171      | -0.1502 | -3.0576 |
| H | -3.1827     | 4.3764  | -0.8886 | H | -2.5932     | 5.0347  | 2.1830  | H | -2.4357     | 5.0600  | 2.3645  |
| H | -4.6105     | 4.6901  | 0.1317  | H | -3.6657     | 3.7868  | 2.8088  | H | -3.5730     | 3.8204  | 2.8835  |
| H | -4.3037     | 3.0617  | -0.5285 | H | -4.3254     | 5.0571  | 1.7359  | H | -4.1533     | 5.1843  | 1.8812  |
| H | 0.1632      | 3.9107  | -0.7328 | H | 0.3406      | 3.2522  | -2.8367 | H | 0.1757      | 3.8380  | -0.9947 |
| H | 1.7503      | 4.3742  | -1.3641 | H | -0.0246     | 3.7122  | -1.1811 | H | 1.7820      | 4.2672  | -1.6046 |
| H | 0.5354      | 3.6446  | -2.4312 | H | 1.5319      | 4.1668  | -1.8926 | H | 0.5965      | 3.4765  | -2.6615 |
| H | 6.6435      | -1.4815 | 2.1835  | H | 6.7869      | -0.9842 | 2.1955  | H | 6.8372      | 0.3258  | 1.9884  |
| H | 5.5697      | -0.3386 | 3.0033  | H | 5.6844      | 0.2057  | 2.9023  | H | 6.6148      | -1.3983 | 2.3211  |
| H | 6.8564      | 0.2593  | 1.9452  | H | 6.9125      | 0.7205  | 1.7362  | H | 5.5372      | -0.2078 | 3.0645  |
| H | -2.7836     | -3.6889 | 2.1920  | H | -3.0638     | -3.4476 | 2.6114  | H | -4.1216     | -2.0366 | 2.4632  |
| H | -2.5443     | -2.2210 | 3.1566  | H | -2.3386     | -2.0803 | 3.4871  | H | -3.2063     | -3.5254 | 2.1536  |
| H | -4.0808     | -2.4709 | 2.2834  | H | -3.9908     | -1.9418 | 2.8284  | H | -2.4924     | -2.2366 | 3.1646  |
| N | -2.4445     | -1.8956 | 1.1088  | N | -2.4221     | -1.8117 | 1.4368  | N | -2.5062     | -1.8153 | 1.1383  |
| O | 0.1016      | -2.4728 | -1.1232 | O | 0.2115      | -2.6578 | -0.7147 | O | 0.1077      | -2.5514 | -0.9769 |
| O | -3.3042     | 4.1876  | 2.2070  | O | -3.8396     | 3.6154  | -0.2932 | O | -3.6641     | 3.8704  | -0.2318 |
| O | -2.5874     | -0.2593 | -1.9926 | O | -2.4971     | -0.7784 | -1.9187 | O | -2.5250     | -0.3859 | -2.0701 |
| O | -0.5628     | -1.1157 | 2.1923  | O | -0.5038     | -0.9361 | 2.3794  | O | -0.6489     | -0.9778 | 2.2272  |
| O | -4.2878     | -3.9257 | -0.3533 | O | -4.2567     | -3.1238 | -1.5576 | O | -4.3508     | -3.8240 | -0.1817 |

**Table S12.** Cartesian coordinates of the six lowest-energy conformers of the 3'R,5'S stereoisomer of pyrenosetins F at the B3LYP/TZVP/SMD(CHCl<sub>3</sub>)/B3LYP/6-31+G(d,p)/SMD(CHCl<sub>3</sub>) level

|   | Conformer 1 |         |         |   | Conformer 2 |         |         |   | Conformer 3 |         |         |
|---|-------------|---------|---------|---|-------------|---------|---------|---|-------------|---------|---------|
| C | -0.1945     | -1.3040 | 0.7829  | C | -0.1884     | -1.3781 | 0.6661  | C | -0.1610     | -1.3171 | 0.8571  |
| C | -1.1852     | -0.2585 | 1.2691  | C | -1.1945     | -0.3791 | 1.2186  | C | -1.2436     | -0.3376 | 1.2977  |
| C | -0.3720     | 1.0659  | 1.1848  | C | -0.3938     | 0.9563  | 1.2396  | C | -0.5273     | 1.0416  | 1.2296  |
| C | -1.2254     | 2.3174  | 1.1209  | C | -1.2569     | 2.2022  | 1.2549  | C | -1.4683     | 2.2265  | 1.1313  |
| C | -2.5343     | 2.2528  | 0.8377  | C | -2.5648     | 2.1467  | 0.9652  | C | -2.7587     | 2.0649  | 0.8044  |
| C | -3.2994     | 0.9889  | 0.5539  | C | -3.3190     | 0.8987  | 0.5948  | C | -3.4201     | 0.7466  | 0.5059  |
| C | -4.3291     | 1.1610  | -0.5825 | C | -4.3550     | 1.1425  | -0.5225 | C | -4.4217     | 0.8333  | -0.6645 |
| C | -5.1750     | -0.1074 | -0.7932 | C | -5.1894     | -0.1154 | -0.8217 | C | -5.1651     | -0.4960 | -0.8871 |
| C | -4.2651     | -1.3316 | -1.0011 | C | -4.2677     | -1.3101 | -1.1249 | C | -4.1623     | -1.6521 | -1.0534 |
| C | -3.2141     | -1.4891 | 0.1103  | C | -3.2108     | -1.5394 | -0.0315 | C | -3.1378     | -1.7220 | 0.0915  |
| C | -2.3759     | -0.2059 | 0.2421  | C | -2.3846     | -0.2616 | 0.1963  | C | -2.4015     | -0.3790 | 0.2366  |
| C | -1.6368     | -0.5901 | 2.7002  | C | -1.6457     | -0.8197 | 2.6210  | C | -1.7145     | -0.6908 | 2.7173  |
| C | 0.6066      | 0.8664  | -0.0269 | C | 0.6026      | 0.8458  | 0.0310  | C | 0.4988      | 0.9078  | 0.0481  |
| C | 1.7911      | 1.7878  | -0.0643 | C | 1.7613      | 1.7964  | 0.0447  | C | 1.6034      | 1.9209  | 0.0237  |
| C | 2.1706      | 2.4779  | -1.1519 | C | 2.1180      | 2.5693  | -0.9928 | C | 1.9359      | 2.6520  | -1.0518 |
| C | 3.3568      | 3.3640  | -1.2282 | C | 3.2973      | 3.4758  | -0.9246 | C | 3.0619      | 3.6250  | -1.0199 |
| C | 4.2336      | 3.5501  | -0.0062 | C | 3.5843      | 4.2929  | -2.1647 | C | 3.3245      | 4.3844  | -2.3016 |
| C | -0.5525     | 3.6255  | 1.4541  | C | -0.5960     | 3.4883  | 1.6838  | C | -0.9061     | 3.5806  | 1.4854  |
| C | -6.1700     | 0.0612  | -1.9458 | C | -6.1943     | 0.1273  | -1.9522 | C | -6.1337     | -0.4110 | -2.0711 |
| C | 1.2923      | -1.3282 | -1.2546 | C | 1.4293      | -1.2475 | -1.2782 | C | 1.3994      | -1.2163 | -1.1450 |
| C | 1.0086      | -0.6340 | 0.0741  | C | 1.0380      | -0.6468 | 0.0672  | C | 1.0120      | -0.5537 | 0.1715  |
| C | 2.2786      | -0.9310 | 0.8958  | C | 2.2598      | -0.9645 | 0.9544  | C | 2.2579      | -0.7714 | 1.0466  |
| C | 2.5547      | -2.1755 | -1.1180 | C | 2.7012      | -2.0739 | -1.1085 | C | 2.6766      | -2.0259 | -0.9388 |
| C | 2.2839      | -3.7010 | -1.2293 | C | 2.4735      | -3.5938 | -1.3309 | C | 2.4046      | -3.5367 | -1.1057 |
| C | 4.3228      | -2.2980 | 0.7048  | C | 4.3495      | -2.2666 | 0.8181  | C | 4.3985      | -1.9784 | 0.9594  |
| H | 0.2584      | 1.1230  | 2.0824  | H | 0.2253      | 0.9557  | 2.1461  | H | 0.0699      | 1.1504  | 2.1447  |
| H | -3.1177     | 3.1741  | 0.8451  | H | -3.1562     | 3.0602  | 1.0357  | H | -3.4083     | 2.9409  | 0.7883  |
| H | -3.8781     | 0.7423  | 1.4603  | H | -3.8922     | 0.5820  | 1.4827  | H | -4.0094     | 0.4644  | 1.3950  |
| H | -4.9840     | 2.0125  | -0.3553 | H | -5.0167     | 1.9690  | -0.2319 | H | -5.1445     | 1.6363  | -0.4689 |
| H | -3.8015     | 1.4118  | -1.5143 | H | -3.8339     | 1.4652  | -1.4359 | H | -3.8836     | 1.1131  | -1.5821 |
| H | -5.7497     | -0.2750 | 0.1310  | H | -5.7560     | -0.3574 | 0.0911  | H | -5.7546     | -0.6971 | 0.0211  |
| H | -4.8754     | -2.2412 | -1.0647 | H | -4.8683     | -2.2191 | -1.2548 | H | -4.7028     | -2.6043 | -1.1260 |
| H | -2.5754     | -2.3507 | -0.1063 | H | -2.5640     | -2.3757 | -0.3133 | H | -2.4293     | -2.5350 | -0.0950 |
| H | -3.7190     | -1.7037 | 1.0610  | H | -3.7110     | -1.8301 | 0.9012  | H | -3.6556     | -1.9658 | 1.0281  |
| H | -1.9331     | -0.0148 | -0.7460 | H | -1.9434     | 0.0081  | -0.7743 | H | -1.9444     | -0.1638 | -0.7400 |
| H | 0.0459      | 0.9756  | -0.9609 | H | 0.0465      | 0.9811  | -0.9030 | H | -0.0460     | 0.9602  | -0.9004 |
| H | 1.5999      | 2.4153  | -2.0769 | H | 1.5466      | 2.5570  | -1.9190 | H | 1.3833      | 2.5541  | -1.9843 |
| H | 2.3722      | 1.8523  | 0.8526  | H | 2.3649      | 1.8377  | 0.9497  | H | 2.1875      | 2.0469  | 0.9333  |
| H | 3.2405      | -1.8984 | -1.9309 | H | 3.4325      | -1.7327 | -1.8547 | H | 3.4236      | -1.7308 | -1.6879 |
| H | -3.7523     | -1.2338 | -1.9694 | H | -3.7604     | -1.1339 | -2.0850 | H | -3.6282     | -1.5255 | -2.0068 |
| H | 1.6424      | -3.8519 | -2.1114 | H | 1.9041      | -3.7015 | -2.2673 | H | 1.6584      | -3.8567 | -0.3698 |
| H | 3.2320      | -4.2113 | -1.4245 | H | 3.4446      | -4.0748 | -1.4824 | H | 1.9861      | -3.6821 | -2.1071 |
| H | 0.9504      | -3.7865 | 0.2064  | H | 1.0326      | -3.7942 | -0.0158 | H | 3.7292      | -4.5532 | -0.1004 |
| H | -0.7740     | -0.6215 | 3.3730  | H | -2.1366     | -1.7952 | 2.5933  | H | -2.1344     | -1.6986 | 2.7568  |
| H | -2.3271     | 0.1699  | 3.0755  | H | -0.7827     | -0.8972 | 3.2897  | H | -0.8733     | -0.6518 | 3.4167  |
| H | -2.1314     | -1.5630 | 2.7454  | H | -2.3386     | -0.0920 | 3.0515  | H | -2.4718     | 0.0169  | 3.0650  |
| H | 3.6624      | 3.9896  | 0.8190  | H | 4.4647      | 4.9187  | -2.0106 | H | 3.5325      | 3.6853  | -3.1208 |
| H | 5.0633      | 4.2113  | -0.2611 | H | 2.7210      | 4.9236  | -2.4100 | H | 4.1695      | 5.0628  | -2.1735 |
| H | 4.6280      | 2.5909  | 0.3458  | H | 3.7468      | 3.6314  | -3.0244 | H | 2.4338      | 4.9552  | -2.5914 |
| H | 0.2536      | 3.8627  | 0.7506  | H | 0.2194      | 3.7766  | 1.0110  | H | -0.0840     | 3.8711  | 0.8217  |
| H | -1.2668     | 4.4539  | 1.4373  | H | -1.3150     | 4.3123  | 1.7145  | H | -1.6754     | 4.3566  | 1.4294  |
| H | -0.0963     | 3.5897  | 2.4523  | H | -0.1517     | 3.3864  | 2.6828  | H | -0.4961     | 3.5803  | 2.5040  |
| H | -5.6487     | 0.2325  | -2.8958 | H | -6.8703     | 0.9571  | -1.7154 | H | -6.8677     | 0.3911  | -1.9308 |
| H | -6.8383     | 0.9133  | -1.7759 | H | -6.8097     | -0.7611 | -2.1355 | H | -6.6863     | -1.3486 | -2.2018 |
| H | -6.7939     | -0.8319 | -2.0669 | H | -5.6817     | 0.3744  | -2.8902 | H | -5.5971     | -0.2097 | -3.0066 |
| H | 4.5617      | -1.7634 | 1.6242  | H | 5.1955      | -2.0652 | 0.1531  | H | 4.6734      | -1.2273 | 1.7013  |
| H | 4.2204      | -3.3651 | 0.9245  | H | 4.5181      | -1.7750 | 1.7764  | H | 4.3710      | -2.9565 | 1.4521  |
| H | 5.1299      | -2.1534 | -0.0206 | H | 4.2618      | -3.3460 | 0.9764  | H | 5.1495      | -2.0035 | 0.1661  |
| N | 3.0774      | -1.7651 | 0.1789  | N | 3.1259      | -1.7342 | 0.2431  | N | 3.1047      | -1.6174 | 0.3979  |
| O | -0.3027     | -2.5106 | 0.9208  | O | -0.3000     | -2.5921 | 0.6882  | O | -0.1615     | -2.5190 | 1.0247  |
| O | 3.6134      | 3.9350  | -2.2842 | O | 3.9985      | 3.5574  | 0.0780  | O | 3.7403      | 3.8043  | -0.0141 |
| O | 0.6242      | -1.2344 | -2.2605 | O | 0.8319      | -1.0994 | -2.3218 | O | 0.7942      | -1.1286 | -2.1916 |
| O | 2.5146      | -0.4804 | 2.0129  | O | 2.4073      | -0.5837 | 2.1112  | O | 2.4425      | -0.2774 | 2.1545  |
| O | 1.7553      | -4.2703 | -0.0553 | O | 1.8698      | -4.2422 | -0.2371 | O | 3.5946      | -4.3079 | -1.0259 |

Table S12 (continued)

| Conformer 4 |         |         | Conformer 5 |   |         | Conformer 6 |         |   |         |         |         |
|-------------|---------|---------|-------------|---|---------|-------------|---------|---|---------|---------|---------|
| C           | -0.1668 | -1.2380 | 0.9643      | C | -0.2233 | -1.1760     | 1.1037  | C | -0.1690 | -1.2343 | 0.9651  |
| C           | -1.2421 | -0.2229 | 1.3324      | C | -1.2237 | -0.0613     | 1.3842  | C | -1.2441 | -0.2180 | 1.3316  |
| C           | -0.5162 | 1.1420  | 1.1632      | C | -0.3997 | 1.2317      | 1.1269  | C | -0.5174 | 1.1464  | 1.1614  |
| C           | -1.4509 | 2.3233  | 0.9875      | C | -1.2442 | 2.4610      | 0.8514  | C | -1.4510 | 2.3280  | 0.9820  |
| C           | -2.7429 | 2.1469  | 0.6747      | C | -2.5426 | 2.3551      | 0.5333  | C | -2.7429 | 2.1520  | 0.6687  |
| C           | -3.4109 | 0.8150  | 0.4647      | C | -3.3039 | 1.0627      | 0.4128  | C | -3.4118 | 0.8201  | 0.4615  |
| C           | -4.4101 | 0.8281  | -0.7111     | C | -4.2907 | 1.0597      | -0.7736 | C | -4.4111 | 0.8318  | -0.7143 |
| C           | -5.1588 | -0.5100 | -0.8460     | C | -5.1339 | -0.2273     | -0.8184 | C | -5.1605 | -0.5061 | -0.8471 |
| C           | -4.1610 | -1.6790 | -0.9334     | C | -4.2233 | -1.4686     | -0.8053 | C | -4.1633 | -1.6758 | -0.9326 |
| C           | -3.1392 | -1.6776 | 0.2161      | C | -3.2130 | -1.4543     | 0.3541  | C | -3.1416 | -1.6731 | 0.2169  |
| C           | -2.3976 | -0.3310 | 0.2731      | C | -2.3755 | -0.1644     | 0.3200  | C | -2.3993 | -0.3269 | 0.2721  |
| C           | -1.7188 | -0.4686 | 2.7719      | C | -1.7275 | -0.1663     | 2.8316  | C | -1.7214 | -0.4620 | 2.7712  |
| C           | 0.5010  | 0.9208  | -0.0129     | C | 0.6100  | 0.8549      | -0.0158 | C | 0.5015  | 0.9235  | -0.0126 |
| C           | 1.6231  | 1.9150  | -0.0949     | C | 1.8016  | 1.7586      | -0.1504 | C | 1.6253  | 1.9159  | -0.0932 |
| C           | 1.9669  | 2.5639  | -1.2194     | C | 2.2052  | 2.2985      | -1.3119 | C | 1.9799  | 2.5546  | -1.2203 |
| C           | 3.0884  | 3.5251  | -1.3420     | C | 3.3925  | 3.1699      | -1.4822 | C | 3.1058  | 3.5105  | -1.3423 |
| C           | 3.9366  | 3.8481  | -0.1283     | C | 4.2398  | 3.5280      | -0.2779 | C | 3.9397  | 3.8478  | -0.1226 |
| C           | -0.8805 | 3.6959  | 1.2433      | C | -0.5773 | 3.8041      | 1.0145  | C | -0.8792 | 3.7008  | 1.2335  |
| C           | -6.1251 | -0.5000 | -2.0348     | C | -6.0875 | -0.2373     | -2.0175 | C | -6.1269 | -0.4975 | -2.0359 |
| C           | 1.3045  | -1.3016 | -1.0914     | C | 1.2749  | -1.4893     | -0.9137 | C | 1.3048  | -1.2982 | -1.0905 |
| C           | 0.9929  | -0.5404 | 0.1896      | C | 0.9952  | -0.6201     | 0.3010  | C | 0.9918  | -0.5380 | 0.1911  |
| C           | 2.2728  | -0.7232 | 1.0214      | C | 2.2463  | -0.8246     | 1.1709  | C | 2.2715  | -0.7218 | 1.0233  |
| C           | 2.5853  | -2.1115 | -0.8906     | C | 2.5447  | -2.2945     | -0.6798 | C | 2.5800  | -2.1130 | -0.8866 |
| C           | 2.3007  | -3.6161 | -0.9586     | C | 2.2276  | -3.8103     | -0.7146 | C | 2.2866  | -3.6280 | -0.9436 |
| C           | 4.3829  | -1.9939 | 0.9237      | C | 4.2895  | -2.2098     | 1.1742  | C | 4.3760  | -2.0040 | 0.9284  |
| H           | 0.0870  | 1.3098  | 2.0660      | H | 0.2057  | 1.4221      | 2.0237  | H | 0.0842  | 1.3154  | 2.0650  |
| H           | -3.3875 | 3.0233  | 0.5992      | H | -3.1210 | 3.2675      | 0.3845  | H | -3.3867 | 3.0287  | 0.5905  |
| H           | -4.0033 | 0.5962  | 1.3695      | H | -3.9177 | 0.9555      | 1.3234  | H | -4.0044 | 0.6033  | 1.3666  |
| H           | -5.1299 | 1.6453  | -0.5705     | H | -4.9499 | 1.9349      | -0.7035 | H | -5.1303 | 1.6497  | -0.5752 |
| H           | -3.8692 | 1.0441  | -1.6440     | H | -3.7287 | 1.1655      | -1.7130 | H | -3.8700 | 1.0460  | -1.6476 |
| H           | -5.7507 | -0.6478 | 0.0724      | H | -5.7415 | -0.2525     | 0.0997  | H | -5.7524 | -0.6421 | 0.0716  |
| H           | -4.7059 | -2.6315 | -0.9442     | H | -4.8357 | -2.3774     | -0.7522 | H | -4.7086 | -2.6279 | -0.9419 |
| H           | -2.4334 | -2.5038 | 0.0846      | H | -2.5687 | -2.3370     | 0.2942  | H | -2.4365 | -2.5000 | 0.0869  |
| H           | -3.6595 | -1.8574 | 1.1657      | H | -3.7523 | -1.5234     | 1.3075  | H | -3.6622 | -1.8511 | 1.1667  |
| H           | -1.9369 | -0.1842 | -0.7143     | H | -1.8974 | -0.1261     | -0.6695 | H | -1.9380 | -0.1819 | -0.7154 |
| H           | -0.0459 | 0.9326  | -0.9612     | H | 0.0735  | 0.8375      | -0.9699 | H | -0.0436 | 0.9353  | -0.9619 |
| H           | 1.4126  | 2.4055  | -2.1429     | H | 1.6532  | 2.1129      | -2.2318 | H | 1.4330  | 2.3893  | -2.1471 |
| H           | 2.1876  | 2.0723  | 0.8211      | H | 2.3646  | 1.9419      | 0.7618  | H | 2.1829  | 2.0795  | 0.8259  |
| H           | 3.2982  | -1.8640 | -1.6899     | H | 3.2697  | -2.0852     | -1.4788 | H | 3.2913  | -1.8639 | -1.6881 |
| H           | -3.6242 | -1.6179 | -1.8916     | H | -3.6760 | -1.5186     | -1.7582 | H | -3.6264 | -1.6165 | -1.8909 |
| H           | 1.6688  | -3.9019 | -0.1082     | H | 3.1133  | -4.3718     | -0.4041 | H | 1.6515  | -3.9003 | -0.0969 |
| H           | 1.7427  | -3.8067 | -1.8869     | H | 1.4195  | -4.0270     | -0.0016 | H | 1.7330  | -3.8268 | -1.8715 |
| H           | 3.3608  | -5.2459 | -0.8563     | H | 1.1650  | -3.6913     | -2.3332 | H | 3.9564  | -4.3168 | -1.6745 |
| H           | -2.4689 | 0.2700  | 3.0664      | H | -2.4234 | 0.6445      | 3.0627  | H | -2.1524 | -1.4597 | 2.8825  |
| H           | -2.1497 | -1.4664 | 2.8823      | H | -2.2313 | -1.1194     | 3.0082  | H | -0.8814 | -0.3825 | 3.4687  |
| H           | -0.8786 | -0.3896 | 3.4692      | H | -0.8885 | -0.0978     | 3.5315  | H | -2.4714 | 0.2771  | 3.0646  |
| H           | 3.3268  | 4.2944  | 0.6650      | H | 5.0681  | 4.1604      | -0.6011 | H | 4.3899  | 2.9473  | 0.3087  |
| H           | 4.7193  | 4.5508  | -0.4183     | H | 4.6369  | 2.6287      | 0.2053  | H | 3.3212  | 4.3069  | 0.6565  |
| H           | 4.3952  | 2.9431  | 0.2843      | H | 3.6463  | 4.0642      | 0.4708  | H | 4.7284  | 4.5440  | -0.4123 |
| H           | -0.0698 | 3.9389  | 0.5471      | H | 0.2525  | 3.9379      | 0.3113  | H | -1.6468 | 4.4742  | 1.1350  |
| H           | -1.6488 | 4.4688  | 1.1469      | H | -1.2873 | 4.6210      | 0.8548  | H | -0.4538 | 3.7704  | 2.2435  |
| H           | -0.4556 | 3.7627  | 2.2538      | H | -0.1545 | 3.9130      | 2.0221  | H | -0.0686 | 3.9410  | 0.5361  |
| H           | -6.6821 | -1.4416 | -2.1033     | H | -6.7106 | -1.1391     | -2.0232 | H | -6.8567 | 0.3162  | -1.9525 |
| H           | -5.5861 | -0.3645 | -2.9807     | H | -5.5324 | -0.2123     | -2.9635 | H | -6.6844 | -1.4388 | -2.1028 |
| H           | -6.8554 | 0.3131  | -1.9501     | H | -6.7575 | 0.6301      | -2.0033 | H | -5.5878 | -0.3639 | -2.9820 |
| H           | 5.1581  | -1.7784 | 0.1804      | H | 4.2545  | -3.2514     | 1.5081  | H | 5.1585  | -1.7705 | 0.1973  |
| H           | 4.5625  | -1.4003 | 1.8203      | H | 5.0882  | -2.1013     | 0.4325  | H | 4.5482  | -1.4282 | 1.8379  |
| H           | 4.4229  | -3.0575 | 1.1670      | H | 4.5008  | -1.5701     | 2.0313  | H | 4.4144  | -3.0721 | 1.1508  |
| N           | 3.0742  | -1.6302 | 0.3996      | N | 3.0171  | -1.7953     | 0.6050  | N | 3.0717  | -1.6302 | 0.4010  |
| O           | -0.1638 | -2.4204 | 1.2364      | O | -0.3088 | -2.3336     | 1.4536  | O | -0.1671 | -2.4165 | 1.2373  |
| O           | 3.3159  | 4.0480  | -2.4294     | O | 3.6731  | 3.5904      | -2.6009 | O | 3.3486  | 4.0174  | -2.4341 |
| O           | 0.6482  | -1.2837 | -2.1095     | O | 0.5742  | -1.5792     | -1.9040 | O | 0.6514  | -1.2778 | -2.1110 |
| O           | 2.5115  | -0.1508 | 2.0814      | O | 2.4902  | -0.2220     | 2.2116  | O | 2.5115  | -0.1500 | 2.0832  |
| O           | 3.5475  | -4.3007 | -0.9506     | O | 1.9184  | -4.2242     | -2.0311 | O | 3.4592  | -4.4204 | -0.8494 |

**Table S13.** Cartesian coordinates of the six lowest-energy conformers of the 3'S,5'S stereoisomer of pyrenosetins F at the B3LYP/TZVP/SMD(CHCl<sub>3</sub>)/B3LYP/6-31+G(d,p)/SMD(CHCl<sub>3</sub>) level.

| Conformer 1 |         |         |         | Conformer 2 |         |         | Conformer 3 |   |         |         |         |
|-------------|---------|---------|---------|-------------|---------|---------|-------------|---|---------|---------|---------|
| C           | 0.4335  | -1.4802 | -0.9098 | C           | -0.3659 | -1.2852 | 1.0911      | C | 0.3274  | -1.4586 | -0.8155 |
| C           | 1.3995  | -0.3732 | -1.3200 | C           | -1.3603 | -0.1659 | 1.3733      | C | 1.3290  | -0.4186 | -1.3052 |
| C           | 0.5201  | 0.9097  | -1.2666 | C           | -0.5190 | 1.1233  | 1.1566      | C | 0.5190  | 0.9092  | -1.2626 |
| C           | 1.3076  | 2.1988  | -1.1336 | C           | -1.3469 | 2.3644  | 0.8814      | C | 1.3762  | 2.1593  | -1.2134 |
| C           | 2.5970  | 2.1918  | -0.7654 | C           | -2.6401 | 2.2765  | 0.5384      | C | 2.6792  | 2.0973  | -0.9032 |
| C           | 3.4036  | 0.9607  | -0.4523 | C           | -3.4112 | 0.9937  | 0.3829      | C | 3.4347  | 0.8372  | -0.5783 |
| C           | 4.3479  | 1.1562  | 0.7524  | C           | -4.3755 | 1.0208  | -0.8216     | C | 4.4431  | 1.0279  | 0.5739  |
| C           | 5.2404  | -0.0750 | 0.9914  | C           | -5.2273 | -0.2585 | -0.9062     | C | 5.2794  | -0.2398 | 0.8248  |
| C           | 4.3819  | -1.3470 | 1.1139  | C           | -4.3260 | -1.5065 | -0.9014     | C | 4.3612  | -1.4569 | 1.0387  |
| C           | 3.4125  | -1.5279 | -0.0660 | C           | -3.3376 | -1.5228 | 0.2767      | C | 3.3306  | -1.6318 | -0.0890 |
| C           | 2.5220  | -0.2832 | -0.2242 | C           | -2.4908 | -0.2387 | 0.2837      | C | 2.5010  | -0.3477 | -0.2606 |
| C           | 1.9516  | -0.6553 | -2.7259 | C           | -1.8967 | -0.2923 | 2.8072      | C | 1.8050  | -0.7803 | -2.7205 |
| C           | -0.5158 | 0.6429  | -0.1169 | C           | 0.5207  | 0.7618  | 0.0378      | C | -0.4746 | 0.7431  | -0.0598 |
| C           | -1.7288 | 1.5235  | -0.1093 | C           | 1.7264  | 1.6573  | -0.0190     | C | -1.6459 | 1.6796  | -0.0461 |
| C           | -2.1608 | 2.2032  | 0.9645  | C           | 2.2337  | 2.1613  | -1.1560     | C | -2.0517 | 2.3664  | 1.0332  |
| C           | -3.3840 | 3.0499  | 0.9148  | C           | 3.4244  | 3.0398  | -1.2419     | C | -3.2410 | 3.2613  | 0.9878  |
| C           | -3.7892 | 3.7146  | 2.2124  | C           | 4.1494  | 3.4495  | 0.0256      | C | -3.5940 | 3.9704  | 2.2762  |
| C           | 0.5970  | 3.4775  | -1.5011 | C           | -0.6680 | 3.6986  | 1.0660      | C | 0.7126  | 3.4604  | -1.5893 |
| C           | 6.1507  | 0.1135  | 2.2092  | C           | -6.1595 | -0.2377 | -2.1219     | C | 6.2536  | -0.0528 | 1.9924  |
| C           | -2.0127 | -1.2529 | -1.1703 | C           | 2.0981  | -1.0882 | 1.0947      | C | -2.1227 | -1.1306 | -0.9044 |
| C           | -0.8460 | -0.8667 | -0.2616 | C           | 0.8556  | -0.7319 | 0.2876      | C | -0.8794 | -0.7538 | -0.1121 |
| C           | -1.1680 | -1.5847 | 1.0503  | C           | 1.0398  | -1.5760 | -0.9850     | C | -1.1345 | -1.4061 | 1.2526  |
| C           | -2.8360 | -2.3421 | -0.4762 | C           | 2.6574  | -2.4040 | 0.5488      | C | -2.8778 | -2.2178 | -0.1480 |
| C           | -4.3305 | -1.9899 | -0.4667 | C           | 4.1917  | -2.4317 | 0.5094      | C | -4.3903 | -1.9028 | -0.1110 |
| C           | -2.6872 | -3.3557 | 1.8594  | C           | 2.3646  | -3.5192 | -1.7283     | C | -2.6236 | -3.1188 | 2.2255  |
| H           | -0.0565 | 0.9564  | -2.2006 | H           | 0.0594  | 1.2974  | 2.0758      | H | -0.0964 | 0.9526  | -2.1723 |
| H           | 3.1346  | 3.1398  | -0.7237 | H           | -3.2054 | 3.1970  | 0.3885      | H | 3.2655  | 3.0168  | -0.9193 |
| H           | 4.0523  | 0.7618  | -1.3225 | H           | -4.0429 | 0.8759  | 1.2798      | H | 4.0303  | 0.5709  | -1.4682 |
| H           | 4.9734  | 2.0433  | 0.5869  | H           | -5.0293 | 1.8998  | -0.7472     | H | 5.1061  | 1.8723  | 0.3436  |
| H           | 3.7494  | 1.3584  | 1.6527  | H           | -3.7948 | 1.1393  | -1.7479     | H | 3.8986  | 1.2980  | 1.4906  |
| H           | 5.8807  | -0.1919 | 0.1031  | H           | -5.8514 | -0.2966 | 0.0005      | H | 5.8709  | -0.4269 | -0.0851 |
| H           | 5.0324  | -2.2267 | 1.1975  | H           | -4.9459 | -2.4117 | -0.8779     | H | 4.9674  | -2.3669 | 1.1313  |
| H           | 2.8030  | -2.4231 | 0.0902  | H           | -2.6984 | -2.4087 | 0.2100      | H | 2.6826  | -2.4854 | 0.1323  |
| H           | 3.9870  | -1.6949 | -0.9864 | H           | -3.8954 | -1.6075 | 1.2184      | H | 3.8524  | -1.8673 | -1.0256 |
| H           | 2.0122  | -0.1385 | 0.7388  | H           | -1.9916 | -0.1850 | -0.6940     | H | 2.0416  | -0.1383 | 0.7158  |
| H           | -0.0067 | 0.7428  | 0.8473  | H           | 0.0217  | 0.7899  | -0.9361     | H | 0.0783  | 0.8632  | 0.8775  |
| H           | -1.6230 | 2.1509  | 1.9092  | H           | 1.7703  | 1.9409  | -2.1160     | H | -1.5166 | 2.2872  | 1.9774  |
| H           | -2.3063 | 1.6007  | -1.0287 | H           | 2.2045  | 1.8796  | 0.9318      | H | -2.2168 | 1.7899  | -0.9661 |
| H           | -2.6960 | -3.2916 | -1.0149 | H           | 2.3199  | -3.2155 | 1.2136      | H | -2.7398 | -3.1796 | -0.6641 |
| H           | 3.8042  | -1.2984 | 2.0486  | H           | -3.7608 | -1.5416 | -1.8442     | H | 3.8304  | -1.3392 | 1.9948  |
| H           | -4.6596 | -1.8931 | -1.5049 | H           | 4.5514  | -2.3022 | 1.5384      | H | -4.8978 | -2.6279 | 0.5316  |
| H           | -4.9007 | -2.8100 | -0.0082 | H           | 4.5239  | -3.4156 | 0.1657      | H | -4.5417 | -0.9028 | 0.3234  |
| H           | -4.3513 | -0.8325 | 1.1001  | H           | 4.6940  | -0.6082 | 0.0357      | H | -4.4885 | -1.3947 | -1.9714 |
| H           | 2.6303  | 0.1399  | -3.0456 | H           | -1.0748 | -0.2371 | 3.5286      | H | 2.5123  | -0.0367 | -3.0970 |
| H           | 2.4887  | -1.6061 | -2.7580 | H           | -2.5956 | 0.5164  | 3.0362      | H | 2.2874  | -1.7603 | -2.7380 |
| H           | 1.1345  | -0.7092 | -3.4526 | H           | -2.4065 | -1.2467 | 2.9574      | H | 0.9565  | -0.8140 | -3.4118 |
| H           | -4.7017 | 4.2959  | 2.0705  | H           | 4.4878  | 2.5746  | 0.5909      | H | -4.4830 | 4.5876  | 2.1372  |
| H           | -2.9851 | 4.3714  | 2.5664  | H           | 3.4872  | 4.0246  | 0.6823      | H | -2.7560 | 4.5985  | 2.6026  |
| H           | -3.9484 | 2.9609  | 2.9931  | H           | 5.0115  | 4.0629  | -0.2410     | H | -3.7711 | 3.2400  | 3.0750  |
| H           | -0.2778 | 3.6592  | -0.8669 | H           | -0.2525 | 3.7934  | 2.0782      | H | 0.2842  | 3.4056  | -2.5989 |
| H           | 1.2633  | 4.3408  | -1.4131 | H           | 0.1685  | 3.8316  | 0.3703      | H | -0.1148 | 3.7097  | -0.9153 |
| H           | 0.2271  | 3.4371  | -2.5342 | H           | -1.3683 | 4.5243  | 0.9088      | H | 1.4256  | 4.2899  | -1.5680 |
| H           | 5.5621  | 0.2352  | 3.1271  | H           | -5.5874 | -0.1991 | -3.0571     | H | 6.9286  | 0.7934  | 1.8189  |
| H           | 6.7847  | 1.0012  | 2.1017  | H           | -6.8231 | 0.6346  | -2.1027     | H | 6.8713  | -0.9457 | 2.1425  |
| H           | 6.8098  | -0.7508 | 2.3512  | H           | -6.7893 | -1.1343 | -2.1559     | H | 5.7153  | 0.1387  | 2.9289  |
| H           | -2.6650 | -4.3730 | 1.4534  | H           | 1.6598  | -3.4548 | -2.5575     | H | -1.8712 | -3.0617 | 3.0125  |
| H           | -2.0091 | -3.2913 | 2.7106  | H           | 3.3784  | -3.3595 | -2.1087     | H | -3.5955 | -2.8386 | 2.6438  |
| H           | -3.7049 | -3.1356 | 2.1990  | H           | 2.3020  | -4.5151 | -1.2767     | H | -2.6810 | -4.1465 | 1.8513  |
| N           | -2.2415 | -2.4031 | 0.8562  | N           | 2.0096  | -2.4998 | -0.7569     | N | -2.2237 | -2.2185 | 1.1557  |
| O           | 0.5811  | -2.6729 | -1.0715 | O           | -0.4574 | -2.4435 | 1.4393      | O | 0.3974  | -2.6609 | -0.9509 |
| O           | -4.0272 | 3.2066  | -0.1170 | O           | 3.8059  | 3.4321  | -2.3406     | O | -3.8994 | 3.4168  | -0.0351 |
| O           | -2.2542 | -0.8027 | -2.2685 | O           | 2.5889  | -0.4529 | 2.0045      | O | -2.4917 | -0.6406 | -1.9558 |
| O           | -0.5379 | -1.4544 | 2.0935  | O           | 0.3870  | -1.4399 | -2.0135     | O | -0.4433 | -1.2329 | 2.2493  |
| O           | -4.5848 | -0.7465 | 0.1642  | O           | 4.7484  | -1.4803 | -0.3807     | O | -4.9592 | -2.0233 | -1.3995 |

Table S13 (continued)

| Conformer 4 |         |         |         | Conformer 5 |         |         |         | Conformer 6 |         |         |         |
|-------------|---------|---------|---------|-------------|---------|---------|---------|-------------|---------|---------|---------|
| C           | 0.3163  | -1.3876 | -0.9344 | C           | 0.3230  | -1.3718 | -0.9648 | C           | 0.3149  | -1.3655 | -0.9138 |
| C           | 1.3797  | -0.3683 | -1.3299 | C           | 1.3849  | -0.3441 | -1.3401 | C           | 1.3129  | -0.2922 | -1.3315 |
| C           | 0.6233  | 0.9891  | -1.2504 | C           | 0.6237  | 1.0093  | -1.2435 | C           | 0.5073  | 1.0295  | -1.1770 |
| C           | 1.5275  | 2.1973  | -1.1001 | C           | 1.5236  | 2.2181  | -1.0724 | C           | 1.3698  | 2.2695  | -1.0372 |
| C           | 2.8130  | 2.0642  | -0.7427 | C           | 2.8079  | 2.0836  | -0.7114 | C           | 2.6764  | 2.1795  | -0.7503 |
| C           | 3.5028  | 0.7580  | -0.4559 | C           | 3.5004  | 0.7755  | -0.4399 | C           | 3.4307  | 0.8958  | -0.5335 |
| C           | 4.4705  | 0.8464  | 0.7427  | C           | 4.4617  | 0.8497  | 0.7648  | C           | 4.4543  | 0.9940  | 0.6168  |
| C           | 5.2441  | -0.4669 | 0.9570  | C           | 5.2376  | -0.4645 | 0.9648  | C           | 5.2876  | -0.2925 | 0.7578  |
| C           | 4.2694  | -1.6528 | 1.0725  | C           | 4.2657  | -1.6546 | 1.0587  | C           | 4.3656  | -1.5179 | 0.8928  |
| C           | 3.2779  | -1.7261 | -0.1010 | C           | 3.2806  | -1.7141 | -0.1209 | C           | 3.3191  | -1.6030 | -0.2309 |
| C           | 2.5093  | -0.4005 | -0.2379 | C           | 2.5092  | -0.3887 | -0.2430 | C           | 2.4947  | -0.3059 | -0.2957 |
| C           | 1.8984  | -0.6775 | -2.7427 | C           | 1.9116  | -0.6302 | -2.7547 | C           | 1.7748  | -0.5422 | -2.7753 |
| C           | -0.4284 | 0.8040  | -0.1005 | C           | -0.4318 | 0.8057  | -0.0999 | C           | -0.4813 | 0.7765  | 0.0148  |
| C           | -1.5641 | 1.7832  | -0.0895 | C           | -1.5736 | 1.7779  | -0.0884 | C           | -1.6644 | 1.7003  | 0.0809  |
| C           | -1.9858 | 2.4403  | 1.0024  | C           | -2.0113 | 2.4194  | 1.0063  | C           | -2.0892 | 2.2930  | 1.2087  |
| C           | -3.1411 | 3.3776  | 0.9528  | C           | -3.1699 | 3.3528  | 0.9537  | C           | -3.2708 | 3.1824  | 1.3113  |
| C           | -3.5084 | 4.0555  | 2.2540  | C           | -3.5645 | 4.0031  | 2.2609  | C           | -4.0899 | 3.4884  | 0.0731  |
| C           | 0.9335  | 3.5435  | -1.4311 | C           | 0.9268  | 3.5671  | -1.3862 | C           | 0.7068  | 3.5998  | -1.2931 |
| C           | 6.1790  | -0.3813 | 2.1677  | C           | 6.1658  | -0.3933 | 2.1817  | C           | 6.2800  | -0.1987 | 1.9210  |
| C           | -2.1090 | -0.9503 | -1.1177 | C           | -2.1064 | -0.9531 | -1.1249 | C           | -2.1382 | -1.0669 | -0.8911 |
| C           | -0.8886 | -0.6710 | -0.2476 | C           | -0.8815 | -0.6713 | -0.2612 | C           | -0.8722 | -0.7188 | -0.1241 |
| C           | -1.2321 | -1.3749 | 1.0690  | C           | -1.2074 | -1.3934 | 1.0503  | C           | -1.0652 | -1.4673 | 1.2029  |
| C           | -2.9555 | -2.0285 | -0.4363 | C           | -2.9466 | -2.0336 | -0.4419 | C           | -2.8233 | -2.2412 | -0.1999 |
| C           | -4.4390 | -1.6596 | -0.4620 | C           | -4.4381 | -1.6515 | -0.4300 | C           | -4.3460 | -2.0040 | -0.0988 |
| C           | -2.8335 | -3.0521 | 1.9062  | C           | -2.7953 | -3.0841 | 1.8867  | C           | -2.4729 | -3.2856 | 2.1025  |
| H           | 0.0508  | 1.1053  | -2.1813 | H           | 0.0543  | 1.1372  | -2.1748 | H           | -0.1124 | 1.1463  | -2.0778 |
| H           | 3.4360  | 2.9576  | -0.6868 | H           | 3.4279  | 2.9780  | -0.6400 | H           | 3.2652  | 3.0960  | -0.6996 |
| H           | 4.1232  | 0.5121  | -1.3346 | H           | 4.1259  | 0.5439  | -1.3189 | H           | 4.0140  | 0.6959  | -1.4485 |
| H           | 5.1758  | 1.6727  | 0.5835  | H           | 5.1657  | 1.6799  | 0.6206  | H           | 5.1182  | 1.8511  | 0.4430  |
| H           | 3.9007  | 1.0912  | 1.6510  | H           | 3.8867  | 1.0805  | 1.6734  | H           | 3.9231  | 1.1947  | 1.5585  |
| H           | 5.8624  | -0.6323 | 0.0607  | H           | 5.8612  | -0.6158 | 0.0698  | H           | 5.8642  | -0.4124 | -0.1728 |
| H           | 4.8338  | -2.5914 | 1.1402  | H           | 4.8324  | -2.5925 | 1.1163  | H           | 4.9675  | -2.4352 | 0.9085  |
| H           | 2.5868  | -2.5608 | 0.0511  | H           | 2.5907  | -2.5525 | 0.0161  | H           | 2.6692  | -2.4678 | -0.0647 |
| H           | 3.8268  | -1.9368 | -1.0280 | H           | 3.8347  | -1.9105 | -1.0479 | H           | 3.8271  | -1.7708 | -1.1894 |
| H           | 2.0183  | -0.2216 | 0.7292  | H           | 2.0131  | -0.2248 | 0.7240  | H           | 2.0455  | -0.1686 | 0.6980  |
| H           | 0.0864  | 0.8551  | 0.8644  | H           | 0.0781  | 0.8529  | 0.8678  | H           | 0.0697  | 0.8489  | 0.9578  |
| H           | -1.4886 | 2.3040  | 1.9607  | H           | -1.5255 | 2.2732  | 1.9689  | H           | -1.5617 | 2.1396  | 2.1485  |
| H           | -2.0961 | 1.9511  | -1.0240 | H           | -2.0963 | 1.9545  | -1.0268 | H           | -2.2037 | 1.8587  | -0.8498 |
| H           | -2.8285 | -2.9744 | -0.9852 | H           | -2.8269 | -2.9716 | -1.0079 | H           | -2.6561 | -3.1541 | -0.7909 |
| H           | 3.7063  | -1.5609 | 2.0129  | H           | 3.6974  | -1.5773 | 1.9972  | H           | 3.8481  | -1.4694 | 1.8620  |
| H           | -4.6094 | -0.7880 | 0.1866  | H           | -4.5851 | -0.7873 | 0.2251  | H           | -4.8009 | -2.8009 | 0.4960  |
| H           | -4.6884 | -1.3723 | -1.4925 | H           | -4.7144 | -1.3564 | -1.4504 | H           | -4.5313 | -1.0505 | 0.4195  |
| H           | -6.1217 | -2.5351 | -0.0249 | H           | -5.2922 | -3.3950 | -0.5911 | H           | -4.5101 | -1.3659 | -0.1935 |
| H           | 2.6481  | 0.0550  | -3.0533 | H           | 2.6600  | 0.1096  | -3.0506 | H           | 0.9195  | -0.5242 | -3.4586 |
| H           | 2.3431  | -1.6741 | -2.7924 | H           | 2.3602  | -1.6243 | -2.8172 | H           | 2.4769  | 0.2303  | -3.0996 |
| H           | 1.0775  | -0.6426 | -3.4663 | H           | 1.0941  | -0.5874 | -3.4817 | H           | 2.2585  | -1.5167 | -2.8740 |
| H           | -3.7329 | 3.3060  | 3.0225  | H           | -3.8059 | 3.2367  | 3.0074  | H           | -3.4773 | 3.9857  | -0.6869 |
| H           | -4.3718 | 4.7072  | 2.1109  | H           | -4.4249 | 4.6577  | 2.1135  | H           | -4.9203 | 4.1402  | 0.3486  |
| H           | -2.6601 | 4.6438  | 2.6249  | H           | -2.7243 | 4.5824  | 2.6628  | H           | -4.4835 | 2.5698  | -0.3755 |
| H           | 0.5452  | 3.5600  | -2.4581 | H           | 0.5420  | 3.5973  | -2.4143 | H           | -0.0965 | 3.8017  | -0.5752 |
| H           | 0.0897  | 3.7922  | -0.7773 | H           | 0.0800  | 3.8039  | -0.7320 | H           | 1.4273  | 4.4205  | -1.2287 |
| H           | 1.6781  | 4.3397  | -1.3371 | H           | 1.6687  | 4.3640  | -1.2782 | H           | 0.2492  | 3.6268  | -2.2911 |
| H           | 6.7537  | -1.3062 | 2.2933  | H           | 5.5942  | -0.2416 | 3.1058  | H           | 6.9571  | 0.6551  | 1.8015  |
| H           | 5.6129  | -0.2151 | 3.0926  | H           | 6.8790  | 0.4345  | 2.0933  | H           | 6.8949  | -1.1032 | 1.9936  |
| H           | 6.8940  | 0.4431  | 2.0638  | H           | 6.7424  | -1.3183 | 2.2975  | H           | 5.7568  | -0.0760 | 2.8774  |
| H           | -2.8472 | -4.0711 | 1.5055  | H           | -3.7902 | -2.8139 | 2.2469  | H           | -3.4404 | -3.0625 | 2.5631  |
| H           | -2.1484 | -3.0022 | 2.7529  | H           | -2.8396 | -4.0966 | 1.4710  | H           | -2.5093 | -4.2891 | 1.6655  |
| H           | -3.8437 | -2.7954 | 2.2321  | H           | -2.0859 | -3.0627 | 2.7144  | H           | -1.7008 | -3.2536 | 2.8716  |
| N           | -2.3567 | -2.1212 | 0.8935  | N           | -2.3269 | -2.1476 | 0.8755  | N           | -2.1308 | -2.3070 | 1.0822  |
| O           | 0.3449  | -2.5836 | -1.1310 | O           | 0.3517  | -2.5636 | -1.1872 | O           | 0.3738  | -2.5516 | -1.1553 |
| O           | -3.7631 | 3.5908  | -0.0826 | O           | -3.7730 | 3.5840  | -0.0890 | O           | -3.5712 | 3.6597  | 2.4016  |
| O           | -2.3813 | -0.4231 | -2.1749 | O           | -2.3865 | -0.4261 | -2.1805 | O           | -2.5725 | -0.4996 | -1.8775 |
| O           | -0.5713 | -1.2853 | 2.0984  | O           | -0.5385 | -1.3112 | 2.0750  | O           | -0.3486 | -1.3385 | 2.1878  |
| O           | -5.1881 | -2.7909 | -0.0373 | O           | -5.2745 | -2.6841 | 0.0671  | O           | -4.9466 | -2.0491 | -1.3783 |
